1 **Title: Stimulus-responsive Self-Assembly of Protein-Based Fractals by Computational**  
2 **Design**

3 **Authors:**

4 **Nancy E. Hernández<sup>1,2†</sup>, William A. Hansen<sup>2†</sup>, Denzel Zhu<sup>3</sup>, Maria E. Shea<sup>4</sup>, Marium**  
5 **Khalid<sup>5</sup>, Viacheslav Manichev<sup>1,6</sup>, Matthew Putnins<sup>2,5</sup>, Muyuan Chen<sup>7</sup>, Anthony G. Dodge<sup>8</sup>,**  
6 **Lu Yang<sup>1</sup>, Ileana Marrero-Berríos<sup>5</sup>, Melissa Banal<sup>9</sup>, Phillip Rechani<sup>10</sup>, Torgny**  
7 **Gustafsson<sup>6,10</sup>, Leonard C. Feldman<sup>6,10</sup>, Sang-Hyuk Lee<sup>2,10</sup>, Lawrence P. Wackett<sup>8,11</sup>, Wei**  
8 **Dai<sup>2,9</sup> and Sagar D. Khare<sup>1,2\*</sup>.**

9 **Affiliations:**

10 <sup>1</sup>Department of Chemistry & Chemical Biology, Rutgers University, Piscataway, NJ.

11 <sup>2</sup>Institute for Quantitative Biomedicine, Rutgers University, Piscataway, NJ.

12 <sup>3</sup>Department of Biochemistry and Microbiology, Rutgers University, New Brunswick, NJ.

13 <sup>4</sup>Department of Molecular Biology & Biochemistry, Rutgers University, Piscataway, NJ.

14 <sup>5</sup>Department of Biomedical Engineering, Rutgers University, Piscataway, NJ.

15 <sup>6</sup>Institute of Advanced Materials, Devices, and Nanotechnology, Rutgers University, Piscataway NJ.

16 <sup>7</sup>Program in Structural and Computational Biology and Molecular Biophysics, Verna and Marrs McLean

17 Department of Biochemistry and Molecular Biology, Baylor College of Medicine, Houston, TX

18 <sup>8</sup>BioTechnology Institute, University of Minnesota, St. Paul, MN

19 <sup>9</sup>Department of Cell Biology and Neuroscience, Rutgers, University, Piscataway, NJ.

20 <sup>10</sup>Department of Physics and Astronomy, Rutgers University, Piscataway, NJ.

21 <sup>11</sup>Department of Biochemistry, Molecular Biology, and Biophysics, University of Minnesota, St. Paul,

22 MN

23 **\*Corresponding author: [sagar.khare@rutgers.edu](mailto:sagar.khare@rutgers.edu)**

24 **†Contributed equally to this work**

1 **Abstract:** Fractal topologies, which are statistically self-similar over multiple length scales, are  
2 pervasive in nature. The recurrence of patterns at increasing length scales in fractal-shaped  
3 branched objects, *e.g.*, trees, lungs, and sponges, results in high effective surface areas, and  
4 provides key functional advantages, *e.g.*, for molecular trapping and exchange. Mimicking these  
5 topologies in designed protein-based assemblies will provide access to novel classes of  
6 functional biomaterials for wide ranging applications. Here we describe a computational design  
7 approach for the reversible self-assembly of proteins into tunable supramolecular fractal-like  
8 topologies in response to phosphorylation. Computationally-guided atomic-resolution modeling  
9 of fusions of symmetric, oligomeric proteins with Src homology 2 (SH2) binding domain and its  
10 phosphorylatable ligand peptide was used to design iterative branching leading to assembly  
11 formation by two enzymes of the atrazine degradation pathway. Structural characterization using  
12 various microscopy techniques and Cryo-electron tomography revealed a variety of dendritic,  
13 hyperbranched, and sponge-like topologies which are self-similar over three decades (~10nm-  
14 10 $\mu$ m) of length scale, in agreement with models from multi-scale computational simulations.  
15 Control over assembly topology and formation dynamics is demonstrated. Owing to their  
16 sponge-like structure on the nanoscale, fractal assemblies are capable of efficient and  
17 phosphorylation-dependent reversible macromolecular capture. The described design framework  
18 should enable the construction of a variety of novel, spatiotemporally responsive biomaterials  
19 featuring fractal topologies.

20

21 **One Sentence Summary:** We report a computationally-guided bottom up design approach for  
22 constructing fractal-shaped protein assemblies for efficient molecular capture.

1 **Main Text:**

2 Fractional-dimensional (fractal) geometry – a property of shapes that are invariant or nearly  
3 invariant to scale magnification or contraction across many length scales – is a common feature of  
4 many natural objects<sup>1,2</sup>. Fractal forms are ubiquitous in geology, *e.g.*, in the architecture of  
5 mountain ranges, coastlines, snowflakes, and in physiology, *e.g.*, neuronal and capillary networks,  
6 and nasal membranes, where highly efficient molecular exchange occurs due to a fractal-induced  
7 high surface area:volume ratio<sup>3</sup>. Fabrication of fractal-like nanomaterials affords high physical  
8 connectivity within patterned objects<sup>4</sup>, ultrasensitive detection of target binding moieties by  
9 patterned nanosensors<sup>5</sup>, and rapid exchange and dispersal of energy and matter<sup>6</sup>. An intimate link  
10 between structural fractal properties of designed, nanotextured materials and functional advantages  
11 (e.g., detection sensitivity) has been demonstrated<sup>5</sup>, and synthetic fractal materials are finding  
12 applications in sensing, molecular electronics, high-performance filtration, sunlight collection,  
13 surface charge storage, and catalysis, among myriad other uses<sup>7,8</sup>. Many fractal fabrication efforts  
14 have relied on top-down patterning of surfaces<sup>9</sup>. The bottom-up design of supramolecular fractal  
15 topologies – both deterministic (e.g., Sierpinski’s triangles)<sup>10,11</sup> and stochastic fractals (e.g.,  
16 arborols)<sup>12,13</sup>– has been performed with small molecule building blocks such as inorganic metal-  
17 ligand complexes or synthetic dendritic polymers utilizing co-ordinate or covalent bonds,  
18 respectively. Self-similar quasi-fractal shapes built with DNA origami have been reported<sup>14-16</sup>,  
19 however, fractal topologies have not been designed with proteins, which possess a wide range of  
20 functionality, biocompatibility, and whose properties are dynamically controllable by reversible  
21 post-translational modifications<sup>17</sup>. While fractal-like topologies have been detected as  
22 intermediates in the formation of natural protein-based biomaterials such as biosilica and silk<sup>18,19</sup>,  
23 and observed in peptide assemblies<sup>20-22</sup>, their tunable construction by utilizing reversible non-

1 covalent interactions between protein building blocks under mild conditions remains a  
2 fundamental design challenge.

3 Self-assembly of engineered proteins<sup>23</sup> provides a general framework for the controllable  
4 and bottom-up fabrication of novel biomaterials with chosen supramolecular topologies but these  
5 approaches have, thus far, been applied to the design of integer (two or three)-dimensional ordered  
6 patterns such as layers, lattices, and polyhedra<sup>24-30</sup>. While external triggers such as metal ions and  
7 redox conditions have been used to trigger synthetic protein and peptide assemblies<sup>20,21,31-34</sup>,  
8 phosphorylation – a common biological stimulus used for dynamic control over protein function  
9 – has yet to be utilized for controlling protein assembly formation.

10 Among stochastic fractals, an arboreal (tree-like) shape is an elementary topology that can  
11 be generated using stochastic branching algorithms, *e.g.*, L-systems<sup>35,36</sup>, in which the probability  
12 of branching, length and number of branches, and branching angle ranges at each iteration  
13 determine the emergent topology (Fig. 1A). Theoretical and simulation studies on the self-  
14 assembly of ‘patchy’ colloidal particles<sup>37,38</sup> have shown that a variety of topologies, including  
15 fractal-like topologies<sup>39-41</sup>, can result from stochastic self-assembly processes involving strong,  
16 anisotropic short-range forces<sup>42-46</sup>. Under conditions where inter-molecular interaction energy is  
17 much larger (more negative) than thermal energy, emergent large-scale aggregates are expected to  
18 be out-of-equilibrium kinetically trapped states rather than (usually crystalline) globally stable  
19 thermodynamic minima. As reorganization of aggregate morphologies, once formed, is expected  
20 to be unfavorable, we reasoned that these kinetic traps can be utilized to produce an elaborate,  
21 tunable and responsive structural (and, thus, functional) diversity of self-assembled protein-based  
22 systems<sup>47</sup>.

1           To implement a general approach for tunably designing arboreal fractal morphologies  
2 using triggerable self-assembly of protein building blocks, we envisioned the need for: (a) a set of  
3 branching components whose binding to each other would lead to propagation of the assembly  
4 (Fig. 1A), (b) a modular system for connecting, with high affinity, these components reversibly in  
5 response to a chosen chemical trigger, and (c) degeneracy of protein-protein binding modes  
6 (geometries), such that stochastic but anisotropic, directional propagation of multiple branching  
7 geometries leads to emergent fractal-like supramolecular topologies (Fig. S1). We chose (a) the  
8 oligomeric enzymes AtzA (hexameric) and AtzC (tetrameric) of the atrazine biodegradation  
9 pathway<sup>48</sup> featuring dihedral ( $D_3$  and  $D_2$ , respectively) symmetry (Fig. 1B), (b) a phosphorylatable  
10 peptide (pY) tag with its corresponding engineered high-affinity “superbinder” Src homology 2  
11 (SH2) domain<sup>49</sup>, and (c) linker segments that can stabilize multiple binding orientations,  
12 respectively, as design elements encoding these properties (Fig. 1B,C,D). We have previously  
13 utilized a similar binding domain-peptide fusion strategy to design non-propagating multi-  
14 component enzyme complexes<sup>50</sup>.

15           The sequences of the designed protein components were obtained using a procedure  
16 implemented in the Rosetta macromolecular modeling program<sup>51</sup> aimed at making a maximum of  
17 three divalent connections between each AtzA and AtzC mediated by SH2 domain-  
18 phosphopeptide binding (Fig. 1C,D). Divalent connections between components were sought to  
19 enable avidity leading to strong, directional, short-range interactions (“aeolotropic interactions”<sup>44</sup>)  
20 that would promote fractal growth (Fig. 1E,F). We also reasoned that geometric degeneracy in the  
21 form of multiple propagatable (but still anisotropic) binding modes would favor fractal structures  
22 (Fig. S1). In the first step of the design procedure, one of the  $C_2$  axes of the crystallographic  
23 structures of the two components were aligned. (Fig. 1B). Two alignments (Fig. 1E,F), obtained

1 by rotating AtzA (hexamer) by  $180^\circ$  about its  $C_3$  axis, were considered, and the remaining two  
2 symmetry-compatible degrees of freedom for placement – the inter-component center-of-mass  
3 distance  $d$  and rotation angle  $\theta$  about the aligned axis of symmetry – were sampled (Fig. 1B,E,F).  
4 For every value of  $d$  we sampled several discrete values of  $\theta$  that, if uniformly adopted, were  
5 predicted to lead to an infinitely propagatable integer-dimensional lattice (Fig. S1). The resulting  
6 propagatable placements were evaluated using RosettaMatch<sup>31</sup> for geometrically feasible fusion  
7 to the SH2 domain and phosphopeptide with the C-terminal AtzC and N-terminal of AtzA,  
8 respectively (Fig. S2A,B). Loop closure of successful SH2 domain and phosphopeptide  
9 placements was performed using Rosetta Kinematic Loop Closure (Fig. S2C). Next, optimization  
10 of the new intra- and inter-component interfaces was performed using RosettaDesign (SI 1.3, Fig.  
11 S3). Five AtzA-AtzC fusion protein pairs were chosen for experimental characterization based on  
12 removal of steric clashes (as reflected by calculated Rosetta energy, Table S1), tight interface  
13 packing between SH2 domain and AtzC, and visual examination of design models (Fig. S3). We  
14 found that short, flexible linker sequences (eg. Gly-Gly-Ser) between the SH2 domain and AtzC  
15 led to the most efficient interface packing in designs (Fig. S3) while still potentially allowing  
16 multiple binding modes: several mutations were common among design models obtained at  
17 different (single) values of  $(d, \theta)$  suggesting geometric degeneracy in binding by each variant  
18 (Table S1) would be feasible. Indeed, several other values from the propagatable angle set are  
19 energetically feasible for each designed AtzC-SH2 variant (Table S1).

20 To fully evaluate the predicted geometric degeneracy and anisotropy of binding in designed  
21 inter-component interactions, the conformational landscape over all  $(d, \theta)$  pairs (Fig. 1E,F) was  
22 constructed using Rosetta SymmetricFastRelax simulations for a designed hexamer-tetramer

1 complex, and the calculated energies (Figs. 1E,F) were Boltzmann-weighted (using a simulation  
2 temperature parameter,  $T$ ) to obtain a probability distribution  $P(d, \theta)$  for branching geometry. This  
3 distribution, in turn, was used as input for a coarse-grained stochastic chain-growth tree generation  
4 algorithm for predicting ensembles of emergent topologies on the micrometer length scale (SI 1.6).  
5 Similar hierarchical approaches have previously been developed for modeling protein  
6 crystallization<sup>52</sup>, and colloidal particle<sup>43</sup> and protein self-assembly<sup>45</sup>. In our approach, preferred  
7 inter-component interaction modes at the sub-nanometer scale (Fig. 1G,H) guide the emergence  
8 of higher order structures on the nanometer (Fig. 1I,J) and micrometer length scales (Fig. 1K). For  
9 comparison with experiments, ~100s of emergent structures in the resulting ensemble were  
10 analyzed to determine fractal dimension ( $D_F$ ) using the box counting image processing technique  
11 (Fig. 1L). The fractal dimension of an object is a measure of how its mass or shape scales as a  
12 function of length scale (Fig. S4): an object is considered fractal if this scaling exponent is non-  
13 integer and typically less than the Euclidean dimension in which the object is placed on a set of  
14 length scales (SI 5.4). For example, the  $D_F$  of vasculature patterns on the two-dimensional surface  
15 of human retina<sup>53</sup> is 1.7, and a diffusion-limited aggregation cluster in three-dimensional space has  
16 a  $D_F$  is 2.3<sup>54</sup>. In our simulations, a variety of assembly sizes and fractal dimensions,  $D_F$ , could be  
17 obtained by varying three parameters: (1) the fraction of growth sites selected at each growing  
18 layer allowed to continue propagation ( $c_{\text{frac}}$ ) which reflects the stoichiometry of the two  
19 components, (2) the probability of termination at any chosen propagatable branching point ( $P_{\text{term}}$ ),  
20 which reflects the affinity of interactions (lower the affinity, higher the the  $P_{\text{term}}$ ), and (3) the  
21 Boltzmann factor ( $k_B T$ ), which determines the sampling of inter-component conformational  
22 diversity calculated from Rosetta simulations (Fig 1M-P, Fig. S5, S6).

1 Genes encoding the designed AtzA and AtzC variants and the corresponding fusions of  
2 wild type domains were constructed and cloned into an *E. coli* BL21(DE3) strain harboring a  
3 second plasmid for the inducible expression of GroEL/ES chaperones to aid protein yields.  
4 Purified AtzA designs were each phosphorylated using Src kinase and the presence of  
5 phosphotyrosine was confirmed using ELISA assays (Fig. S7); binding and assembly formation  
6 with purified AtzC-SH2 domain fusions was assessed using Biolayer Interferometry and Dynamic  
7 Light Scattering, respectively. Phosphorylation, binding and complete conversion of monomers  
8 into 1-10  $\mu\text{m}$ -sized particles upon mixing was best detected with the proteins pY-AtzAM1 and  
9 AtzCM1 (Fig. S8, S9, S10). Either phosphorylation levels were lower (Fig. S9A) or inter-  
10 component binding was weaker (Fig. S9D) with other designs, therefore, we chose pY-  
11 AtzAM1:AtzCM1 design pair for further characterization of assembly-disassembly processes (Fig.  
12 2A). Apart from fusion of pY-tag and SH2 domain, these proteins feature 2 and 3 substitutions  
13 compared to their wild type parent, respectively (Table S1; Fig. S11 and S12).

14 Assembly formation by a mixture of the two components and Src kinase enzyme was ATP  
15 dependent (Fig. 2B), was accompanied by the visible and spectrophotometrically measurable (Fig.  
16 S13) appearance of turbidity, which could be reversed by adding a phosphatase (YopH) enzyme.  
17 The resulting distribution of particle sizes was detected by measuring hydrodynamic radii using  
18 Dynamic Light Scattering (DLS) (Fig. 2C). Upon completion of assembly formation, the apparent  
19 size of the particles as measured by DLS was between 1-10  $\mu\text{m}$ ; however, this range represents  
20 the upper limit of measurement for the instrument; actual particle sizes were expected to be larger.  
21 Addition of monovalent competitive inhibitors, *i.e.* isolated SH2 domain or SH2 domain fused to  
22 an unrelated monovalent protein (SH2-DhaA) inhibited assembly formation in a concentration-



1 dependent manner, demonstrating that the SH2-pYtag binding interaction underlies assembly  
2 formation. The apparent  $IC_{50}$  for the observed inhibition was  $\sim 2 \times [AtzA-pY]$  (measured as  
3 monomers) at two different concentrations of the components (Fig. 2D, S14 to S16), and in each  
4 case  $\sim 3 \times [AtzA-pY]$  was required for complete inhibition. According to our design model, each  
5 pY-AtzA (hexamer) makes at least two and at most three divalent connections for assembly  
6 propagation (Fig. 1E,F); thus, the observed inhibition stoichiometries are consistent with the  
7 existence of the designed divalent connections between AtzA-pY and AtzC-SH2 in the assemblies.

8 As the phosphorylation reaction requires ATP, assembly formation rates could be  
9 controlled by varying the concentration of added ATP. For  $[AtzA-pY]$  and  $[AtzC-SH2]$  of  $3 \mu M$   
10 and  $2 \mu M$ , respectively,  $[ATP] > 250 \mu M$  led to complete conversion of monomers to assemblies  
11 within 5 minutes, whereas significantly slower rates of conversion were observed with lower  
12  $[ATP]$  (Fig. 2E, S17, Table S2. Visualization of assemblies using optical and fluorescence  
13 microscopy (with Alexa-647-labeled AtzC-SH2) revealed the existence of large ( $>10 \mu m$ )  
14 dendritic structures (Fig. 2F, G), whose formation could be observed in real time by adding kinase  
15 and ATP to a mixture of the two component proteins (Movie S1, Fig. S18).

16 Apparent hydrodynamic radius (Fig. 2F, G) and polydispersity measured with DLS (Fig.  
17 S19 and S20) could be controlled by varying the relative stoichiometry of the two components,  
18 and by using a weaker binding affinity variant of the SH2 domain fused to AtzC. A comparison of  
19 assembly formation trends for the lower (Fig. 2F) and higher affinity (Fig. 2G) SH2-domain-  
20 containing constructs shows that robust assembly formation is observed at nearly equal  
21 concentrations of the two components. Assemblies can be formed at concentrations as low as  $50$   
22 nM (Dissociation constant,  $K_D$ , for the weaker and tighter interactions were measured as  $\sim 40$  and

1 ~7 nM, respectively; Fig. S10), whereas when one component is present in excess, assembly  
2 formation is inhibited, as expected from our branch propagation design model (Fig. 1). Assembly  
3 formation by non-stoichiometric concentration combinations with the higher affinity SH2 domain  
4 variant (Fig. 2F, G) indicates that the inhibition caused by an excess of the binding partner is  
5 dynamic. Inhibition of assembly formation due to stoichiometric excess can also be overcome in  
6 an affinity-dependent manner: the zone of stoichiometries where assembly formation occurs is  
7 larger for the higher affinity SH2 domain variant (Fig. 2G) compared to the lower affinity variant  
8 (Fig. 2F). These results highlight the importance of high affinity in stabilizing the designed  
9 kinetically trapped aggregate state: under conditions of uneven stoichiometry (e.g. 250 nM AtzA-  
10 pY; 1000 nM AtzC-SH2) and in the absence of kinetic traps, all AtzA components should be bound  
11 by an excess of AtzC-SH2 domains, and no assemblies should result (expected particle size is <50  
12 nm). This behavior is observed for the weaker-affinity SH2 variant at this stoichiometry (Fig. 2F).  
13 In stark contrast, for the high affinity SH2 variant (Fig. 2G), we observe micrometer-sized  
14 assemblies indicating the presence of aeolotropic kinetic trapping<sup>44</sup> and network formation by  
15 clusters of tightly bound AtzA-pY-AtzC-SH2 assemblies (Movie S1).

16 We next investigated if the dynamic and dendritic structures observed in solution by optical  
17 and fluorescence microscopy (Fig. 2H, I) could form fractals on solid surfaces, and if the topology  
18 of the surface-adsorbed assemblies could be controlled by varying component stoichiometry. Due  
19 to the substantial increase of surface area derived from fractal patterns, surface-adsorbed fractals  
20 at the nanometer-micrometer scale are attractive design targets for applications in many fields like  
21 catalysis, fractal electronics, and the creation of nanopatterned sensors<sup>4,5</sup>. Assemblies with a  
22 chosen stoichiometry of components were generated in buffer, dropped on the surface of a silicon  
23 (or mica) chip, and the solvent was evaporated at room temperature (298 K) under a dry air

1 atmosphere. Visualization of these coated surfaces using Helium Ion and Atomic Force  
2 microscopy reveals striking, intricately textured patterns that coat up to 100  $\mu\text{m}^2$  areas (Fig. 3A-  
3 E). Various morphologies on the micron scale including rod-like, tree-like, fern-like, and petal-  
4 like were observed (Fig. 3A-E); image analysis revealed fractal dimensions between 1.4-1.5 (Fig.  
5 3A,B) to the more Diffusion Limited Aggregation (DLA)-like 1.78 (Figs.3C,D, S21, and S22).  
6 Assembly sizes and fractal dimensions could be tuned by varying the stoichiometry of components  
7 (Fig. 3F), although some heterogeneity in morphologies was present in each sample. At 1:1  
8 stoichiometry of the two components, DLA-like topologies with  $\sim 10 \mu\text{m}$  size were observed,  
9 whereas more dendritic assemblies were observed when unequal stoichiometry samples were used  
10 (Fig. 3F). Similarly, smaller assembly sizes resulted when the concentration of one component  
11 became limiting.

12 Fractal patterns were not observed at any component stoichiometry without addition of  
13 ATP and Src kinase, with unphosphorylated proteins, or upon drying the buffer (to preclude  
14 precipitation-induced assembly formation by the salt in the buffer) demonstrating that fractal  
15 structures are formed by designed components (Fig. S23). Similarly, fractal topologies were not  
16 detected when long ((GSS)<sub>10</sub>), conformationally flexible Gly-Ser-rich linkers were used to fuse the  
17 SH2 domain and pY tag to AtzC, and AtzA, respectively. In mixtures of these proteins, a densely  
18 packed globular topology was detected with HIM, typical of amorphous precipitates (Fig. 3G,H,  
19 S24). Thus, the surface-induced patterns observed with designed AtzC and AtzA are selectively  
20 formed upon inter-component association in the designed geometries but not upon isotropic,  
21 random association as expected for the highly flexible Gly-Ser-rich linker-containing variants.

1 Transmission electron microscopy of designed AtzA-AtzC proteins also revealed  
2 branching, dendritic networks reminiscent of fractal intermediates observed in biosilica  
3 formation<sup>14</sup> (Fig. S25). To further investigate the conformations of designed assemblies in solution  
4 and to obtain sufficiently high-resolution structures to test the validity of our design approach, we  
5 characterized the assemblies using cryo-electron tomography (cryo-ET; Fig. 4A-F, S26, Movies  
6 S2, S3). Assemblies generated by mixing 3  $\mu$ M pY-AtzA and 2  $\mu$ M AtzC-SH2 (or corresponding  
7 AtzA and AtzC fusions with Gly-Ser-rich linkers as controls) were blotted on a grid, frozen, and  
8 visualized on a cryo-electron microscope. Due to the increased image contrast from Volt phase  
9 plates in our microscope setup, pY-AtzA and AtzC-SH2 complexes in assembly tomograms were  
10 easily identified as density clusters. In contrast, constructs with Gly-Ser-rich linkers connecting  
11 pY and SH2 domain with AtzA and AtzC did not form porous clusters but instead (~90% of the  
12 sample) formed large, dense globular clumps (Fig S26B) where individual components were not  
13 resolvable (SI. 5.3). These large topology changes on the micron scale (as observed by both cryo-  
14 ET and HIM) upon conformational flexibility changes at the nanometer scale, further re-inforce  
15 the importance of directional association in our modular fractal assembly design framework.

16 Computational annotation of the density clusters formed by designed components in cryo-  
17 ET-derived images was performed based on individual molecular envelopes of components  
18 derived from Rosetta models of pY-AtzA and AtzC-SH2, respectively, to identify inter-component  
19 connections along assembly branches (Fig. 4A-C). The topology of the largest, nearly fully  
20 interconnected assembly based on electron density (Fig. 4D-F), consisting of approximately 6000  
21 individual protein components, was further analyzed, and compared with an ensemble of simulated  
22 structures with approximately the same number of components. We compared the observed  
23 distributions of nearest-neighbor counts for AtzA-pY (Fig. 4G, Fig.S27), relative numbers of

1 component types incorporated (Fig. 4H), angular distribution (C-A-C connections, Fig. S28), and  
2 the observed fractal dimension (Fig. 4I) of the assemblies with ensembles of structures generated  
3 using computational modeling (Fig. 4J) and found good agreement between the data and our  
4 simulations performed at specific parameter values ( $P_{\text{term}}$ : 0.1,  $C_{\text{frac}}$ : 1.0, and  $kT$ : 9.0). The observed  
5 nearest neighbor distribution for the AtzA-pY component shows that a large majority of these  
6 proteins are connected to 1, 2, or 3 neighboring AtzC-SH2, in agreement with the divalent  
7 connections envisioned in the design model and implemented in the simulated assemblies (Fig. 1).  
8 Additionally, a small but significant number of AtzA-pY proteins have 4 AtzC neighbors in both  
9 the computational ensemble and the cryo-ET images, which indicates physically unconnected  
10 components being proximal to each other in space due to the packing in the assembly, although a  
11 small number of monovalent connections cannot be definitively ruled out in the cryo-ET images  
12 (Fig. 4G). We found that the fractal dimensions from the cryo-ET images and simulations (2.1)  
13 show good agreement (Fig. 4I, J). The expected fractal dimension for a DLA-like cluster, which  
14 results from isotropic interactions, is 2.3 and the observed decreased fractal dimension (2.1)  
15 indicates the anisotropic nature<sup>32-34</sup> of the underlying protein-protein interactions as encoded in  
16 the design approach (Fig. 1). Particle counting (and volume estimation) in a convex hull enclosing  
17 the largest assembly component yields an approximate local concentration of the proteins as ~600-  
18 700  $\mu\text{M}$ , a ~125-fold increase compared to their bulk concentration (3  $\mu\text{M}$  AtzA-pY and 2  $\mu\text{M}$   
19 AtzC-SH2). Particle density in the fractal assembly is ~70,000 particles/ $\mu\text{m}^3$  whereas calculated  
20 density of 2D and 3D crystalline lattices of similar volumes is estimated to be ~4000 and ~40,000  
21 particles/ $\mu\text{m}^3$  (Fig. S1). The high particle density in the fractal while maintaining porosity leads to  
22 a high effective surface area, a characteristic feature of macroscopic fractal objects such as trees,  
23 and sponges. Although we could assign individual density clusters to individual components, the

1 thickness of the ice in this region of the sample lowers resolvability and precludes direct  
2 measurement of orientation of the AtzA-pY and AtzC-SH2 components with respect to each other  
3 for comparison with Rosetta-calculated landscapes (Fig. 1). While there is significant  
4 heterogeneity in assembly sizes (~60% of the proteins adsorbed on the cryo-ET grid are parts of  
5 smaller assemblies) and topologies (Fig. S29), the observed increase in the effective concentrations  
6 concomitant with a high effective surface area with numerous solvent channels (Fig. 4A-F)  
7 indicates that induced fractal-like structure formation is a viable strategy to engineer protein  
8 assemblies with favorable sponge-like properties.

9 We next investigated if the observed textured, sponge-like topology, resulting in a high  
10 surface area:volume in the fractal assembly, endows it with similar enhanced material capture  
11 (“soaking up”) properties on the nanoscale as observed for macroscopic sponges. We reasoned  
12 that the lacunarity (“gappiness”) of the fractal structure and use of an excess AtzA-pY component  
13 under fractal-forming stoichiometries (Fig. 2F,G), would lead to several phosphopeptide sites on  
14 AtzA being open and accessible. The observed large pore sizes (Fig.4D-F) would enable access  
15 to these sites for molecular capture of nanometer-sized, macromolecular moieties bearing SH2  
16 domains. In contrast, due to their dense, globular structure, amorphous assemblies generated with  
17 Gly-Ser-rich linker-containing components would have less available binding sites resulting in a  
18 lower loading capacity (Fig. S24, S26). To test the molecular capture properties of assemblies, we  
19 first used two fusion proteins in which macromolecular cargo proteins were fused to an SH2  
20 domain: SH2-GFP, SH2-DhaA (an engineered DhaA enzyme for the degradation of the  
21 groundwater pollutant 1,2,3-trichloropropane (TCP)), and measured the amount of cargo proteins  
22 captured by fractal and globular assemblies generated using identical amounts of component  
23 proteins (Fig. 5). Indeed, fractal assemblies captured greater amounts of cargo, as evidenced by

1 fluorescence (GFP) and enzymatic activity (DhaA) measurements, respectively (Fig. 5C).  
2 Fluorescence microscopy of SH2-GFP containing assemblies revealed that, as anticipated from  
3 cryo-ET studies, the immobilized cargo protein was distributed throughout the assembly, and  
4 localized to the surface, for fractal and globular assemblies, respectively (Fig. 5D-G). To develop  
5 a more broadly applicable approach for exploiting the efficient molecular capture properties of  
6 fractal assemblies, we generated and utilized a SH2-Protein A fusion protein to capture a  
7 fluorescent IgG antibody. As observed for SH2-GFP and SH2-DhaA, fractal assemblies can  
8 efficiently capture this antibody (Fig. 5H-K, S30). Furthermore, incubation of antibody-loaded  
9 assemblies with YopH phosphatase enzyme permits release of captured cargo antibodies (Fig. 5A-  
10 C). As all full-length IgG antibodies universally have the binding sites for Protein A (their Fc-  
11 domains), antibody-loaded fractal assemblies should enable **(a)** efficient molecular capture of a  
12 variety of macromolecular and small-molecule antigens, and **(b)** phosphorylation-dependent  
13 antibody purification<sup>55-57</sup>.

14 In our design framework, fractal loading capacity is determined by the number and  
15 accessibility of open phosphopeptide binding sites in the assembly. Thus, assemblies formed by 3  
16 (AtzA-pY):1 (SH2-AtzC) are expected to have a greater loading capacity compared to those  
17 formed by 3 (AtzA-pY):2 (SH2-AtzC). Indeed, as anticipated, more antibody was captured and  
18 released by the former compared to the latter (Fig. 5C), demonstrating that customized  
19 optimization of molecular capture-and-release of specific nanoscale objects should be possible by  
20 varying component stoichiometry to obtain the fractal properties on the nano-micrometer scales.  
21 Finally, we asked if the observed functional advantages of fractal topology over a globular one  
22 would extend to the capture and transport of small molecules within the assembly by measuring  
23 the efficacy of atrazine degradation. We incorporated as cargo AtzB – the third pathway enzyme,

1 apart from AtzA and AtzC, required to convert atrazine to the relatively benign metabolite cyanuric  
2 acid (Fig. S31-S34). While both the fractal and globular assemblies appear to be more robustly  
3 active under harsh reactions compared to unassembled enzymes (Fig.S35), and when immobilized  
4 on a Basotect® polymer foam (Fig. S36), both globular and fractal assemblies are equally active  
5 (Fig. S37). The significantly small size of atrazine ( $R_g < 1\text{nm}$ ) and other metabolic pathway  
6 intermediates likely allows them to diffuse equally efficiently in either assembly as the smaller  
7 solvent channel size in the globular assembly may not be an impediment for small molecule guest  
8 as opposed to macromolecular guest molecules. Constructing fractal-like shapes with smaller sized  
9 proteins may allow access to smaller solvent channels.

10 In conclusion, our results demonstrate an approach by which fusion proteins may be  
11 designed to self-assemble into fractal-like morphologies on the 10 nm-10  $\mu\text{m}$  length scale. The  
12 design strategy is conceptually simple, modular, and should be applicable to any set of oligomeric  
13 proteins featuring cyclic, dihedral, and other symmetries, such that multivalent connections,  
14 anisotropy and geometric degeneracy of binding can be used to controllably generate a broad range  
15 of sizes and morphologies of fractal shapes with proteins. In contrast with computational design  
16 of integer-dimensional protein assemblies where considerable remodeling of protein surfaces is  
17 necessary to meet the exacting geometric requirements for inter-component binding<sup>24,25</sup>, our  
18 design approach to obtain fractal-like morphologies involves few substitutions on protein surfaces.  
19 Instead, design goals are encoding high affinity via fusion of binding domains, binding anisotropy  
20 and geometric degeneracy via short, flexible loops (SI 5.1). Although we used SH2 domain-pY  
21 peptide fusions as the high-affinity modular connecting elements to endow phosphorylation  
22 responsiveness, the same design strategy should be applicable for the incorporation of other  
23 peptide recognition domains, responsive to other chemical or physical stimuli. The combination



1 of multivalency and chain flexibility is a key determinant of other recently discovered phases  
2 formed by proteins, including droplets formed by liquid-liquid phase separation<sup>58</sup>. Our results  
3 show that this rich phase behavior of proteins<sup>44</sup> also includes fractal-like morphologies that form  
4 colloidal particles with constituent microscopic molecular networks which may be visualized at  
5 high resolution using cryo-ET. Given the wide-ranging applications of fractal-like nanomaterials  
6 for molecular capture, further development in the design of protein-based fractals described here  
7 is expected to enable the production of novel classes of bionanomaterials and devices.

8

9 **Acknowledgments:** The authors declare that all data supporting the findings of this study are  
10 available within the paper and its supplementary information files. Code used for coarse-grained  
11 simulations of assembly formation is available upon request. SDK and LWP acknowledge  
12 support from NSF (grant #1330760). NEH acknowledges the NSF Graduate Research  
13 Fellowship (#DGE-1433187). MC acknowledges grant #R01GM080139. Cryoelectron  
14 microscopy was supported by the Rutgers New Jersey CryoEM/ET Core Facility. We thank H.  
15 Cho, M. Liu, A. Permaul, O. Dineen, I. Patel, and R. Patel, for experimental assistance; K-B Lee,  
16 G. Montelione, and V. Nanda for technical advice, and D. Baker, V. Nanda for helpful  
17 discussions.

18 **Supplementary Information:**

19 Methods

20 Supplementary Discussion

21 Supplementary References

1 Figures S1-S37

2 Table S1 to S3

3 Movies S1-S3

4 **Author Contributions.** NEH, WAH, and SDK, designed the research. WAH designed proteins  
5 using Rosetta, developed fractal growth simulation methods and analyzed microscopy images.  
6 NEH, DZ, MES, and MK expressed and purified all the proteins used in the study, performed  
7 enzyme activity and assembly formation assays. NEH, VM, TG, LPF performed Helium Ion  
8 Microscopy. NEH, MP, PR and S.-H, Lee performed fluorescence microscopy and bright-field  
9 microscopy. DZ performed the DLS experiments. MK performed the BLI experiments. LY  
10 performed the TEM experiments. IMB performed confocal microscopy (DIC and fluorescence).  
11 AGD, LWP performed the polymer foam immobilization and activity assays. WD and MB  
12 performed the Cryo-electron tomography experiments and analyses. WAH and MC performed  
13 computational analyses of the Cryo-ET data. SDK, NEH and WAH wrote the manuscript. All  
14 authors commented on the manuscript.

15

16

17

18

19

20

21

22

1 **Figure Legends**

2 **Figure 1: Multi-scale Computational Design Approach for fractal assembly design with**

3 **pY-AtzA and AtzC-SH2.** (A) Cartoon representations of an ordered self-similar scaling fractal,

4 an unordered self-similar scaling fractal—note concentric circles are self-similar at different

5 scales—and an unordered statistically self-similar fractal. (B) Two-component library of AtzC

6 (tan) and AtzA (blue) positions was generated by varying the rigid body degrees of freedom

7 along paired  $C_2$  symmetry axes. (C and D) Design and modeling of assembly at the molecular

8 scale was performed by fusing an SH2 binding domain and its corresponding phosphorylatable

9 peptide to AtzC (C) and AtzA (D) respectively. Linker between the SH2 domain and AtzC was

10 designed to ensure symmetric binding between the hexamer and tetramer leading to propagation.

11 (E and F) Flexibility analysis was performed by evaluation of the Rosetta energy landscape of

12 symmetrical connections and the probability of observing different connection distances and

13 angles were calculated using the Boltzmann distribution for two binding modes: vertex (E) and

14 Edge (F). Boltzmann weighted connection probabilities were utilized in a stochastic chain-

15 growth program with a coarse-grained protein model to generate emergent structures. Atomic

16 interactions that stabilized novel interfaces formed from physically connected components (G

17 and H) dictate the rotation along the C-symmetric axis between components (I and J) which

18 ultimately produce combinations of orientations that lead to fractal-like topologies (K) on the

19 micrometer scale. (L) Representation of expected fractal dimension (slope) for fractals analyzed

20 in solution and on surfaces. (M to P) Examples of fractal simulation output across varying

21 termination probabilities ( $P_{\text{term}}$ ) and fraction of components ( $C_{\text{frac}}$ ) at fixed  $kT$ .

22

1 **Figure 2: Assembly Formation, Dissolution and Inhibition *in vitro*.** (A) Using Src kinase, the  
2 AtzAM1 can be phosphorylated (pY-AtzAM1) and incubated with AtzCM1-SH2 to form an  
3 assembly. The phosphatase (YOP) enzyme can be used for disassembly. (B and C) Assemblies  
4 were expected to form (B) and dissolve (C), respectively, as confirmed by DLS measurements.  
5 (D) Incubation of assembling components with various concentrations of free SH2 domain and a  
6 different (monovalent) SH2 fusion protein led to robust inhibition. (E) ATP concentration was  
7 shown to control the rate of assembly formation (highest concentration of ATP to lowest, starting  
8 from top to bottom at time 0) (F and G) Assembly formation is highly sensitive to  
9 stoichiometry of the components. Varying the stoichiometry (F and G) and the use of a weaker-  
10 binding SH2-peptide interaction (F) leads to a perturbation of the assembly formation zone  
11 compared to the “superbinder” SH2 (G). (H) The fractal-like structure observed by light  
12 microscopy. (I) Fluorescence microscopy image of assembly formed by Alexa Fluor 647<sup>TM</sup>-  
13 labeled AtzCM1-SH2 and pY-AtzAM1.

14  
15 **Figure 3: Assembly formation and characterization with Helium Ion Microscopy (HIM),**  
16 **Atomic Force Microscopy (AFM), and Transmission Electron Microscopy (TEM),** all reveal  
17 fractal-like topologies on a surface, (A to G) Longer fractal-like structures, branch-like, and  
18 flower-like structures are seen in HIM (A to C) and AFM (D). (E) Representative HIM images  
19 for assemblies obtained at different concentrations of pY-AtzAM1 (250 nM- 3  $\mu$ M) while  
20 maintaining a fixed concentration of AtzCM1-SH2 (2  $\mu$ M). Increasing concentrations of pY-  
21 AtzAM1 result in larger assemblies with higher fractal dimensions. (F)  $D_f$  and  $\lambda$ , the fractal  
22 dimension and lacunarity of the images, are similar for images obtained from different  
23 microscopy techniques. HIM images show fractal-like assembly formation with pY-AtzAM1 and

1 AtzCM1-SH2 (**G**), while the Gly-Ser-rich linker-containing variants form globular assemblies  
2 under these conditions (**H**).

3

4 **Figure 4: Assembly characterization with Cryo-electron Tomography**, observed topologies  
5 in solution for a small (**A-C**) and large assembly (**D-F**), in which the subtomograms were  
6 extracted and fit with the Rosetta models. For the small assemblies, atomic resolution models of  
7 pY-AtzAM1 (blue) and AtzCM1-SH2 (tan) were fit to reveal the intercomponent connections  
8 along assembly branches. For the large assembly, due to the lower resolvability in this region of  
9 the sample, only geometric centers of density were used to assign to individual components (blue  
10 and tan spheres; SI 3.6) (**G**) Spatially proximal neighbor distribution from the Cryo-ET-derived  
11 images compared to simulated assemblies. (**H**) The relative component distribution in the cryo-  
12 ET image and from simulations. (**I**) Image analysis (2D), using a box counting method, of the  
13 Cryo-ET tomography subtomograms converted into 2D projections show similar fractal  
14 dimension. Standard deviation in simulation is calculated from 100 simulations comprised of  
15 ~5000 components. 3D box counting revealed similar fractal dimension (slope) between the  
16 experimentally observed and simulated assemblies. (**J**) Parameters for the simulation that match  
17 the experimental data are:  $P_{\text{term}}$ : 0.1,  $C_{\text{frac}}$ : 1.0, and  $kT$ : 9.0; two representative 2D projections  
18 with the matching parameters are shown.

19

20 **Figure 5: Fractal assemblies capture and release greater amounts of cargo compared to**  
21 **globular assemblies.** Scheme for the envisioned reversible capture of cargo proteins for the (**A**)  
22 fractal and (**B**) globular structures. The red stars denote an example cargo protein (antibody). (**C**)  
23 % protein capture was measured for 3:2 fractal (assemblies obtained with 3 AtzA-pY: 2 AtzC-

1 SH2), 3:2 GS linker (globular assemblies obtained at the same stoichiometry with fusion proteins  
2 containing long GS-rich linkers), and 3:1 fractal (assemblies obtained with 3 AtzA-pY: 1 AtzC-  
3 SH2). The 3:2 fractal captured more IgG antibody (red bars) and GFP-SH2 (green bars), and  
4 degraded more substrate TCP (purple bar; reflecting the higher capture efficiency of enzyme  
5 DhaA-Sh2) than the 3:2 GS linker assemblies. In addition, 3:2 fractal released more captured  
6 antibody compared to the 3:2 GS linker when incubated with YopH phosphatase (blue bars). **(D,**  
7 **E)** Confocal fluorescence microscopy images of the 3-component assembly with GFP-SH2  
8 showing the topology of incorporation of GFP-SH2 in fractal and **(F-G)** the incorporation of  
9 GFP-SH2 into the globular assemblies. **(H-I)** the IgG antibody Alexa Fluor 568 incorporation  
10 into the fractal assembly and **(J-K)** the incorporation into the globular assembly.

11  
12  
13  
14  
15  
16  
17  
18  
19  
20  
21  
22  
23  
24  
25  
26  
27  
28  
29  
30  
31  
32  
33  
34  
35

1 **Figures**

2

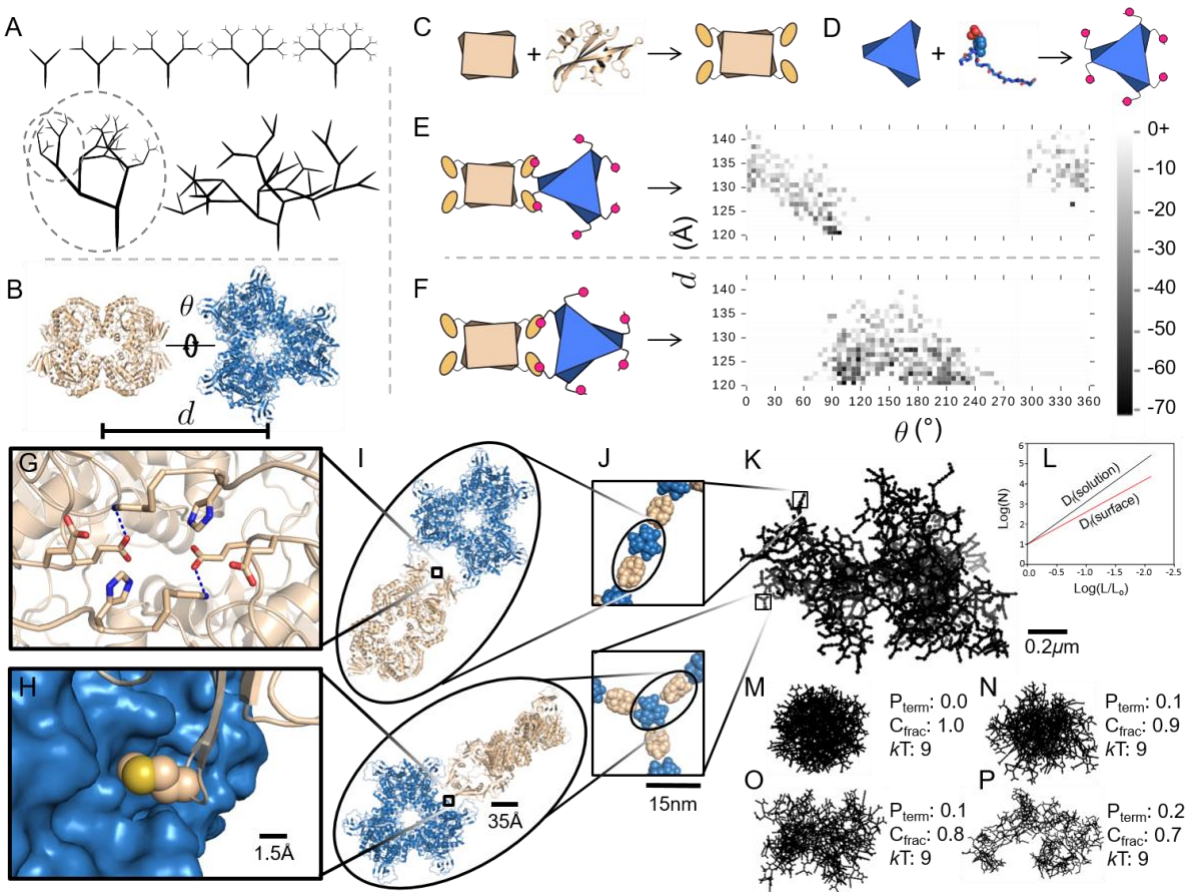

3

4

5 **Figure 1**

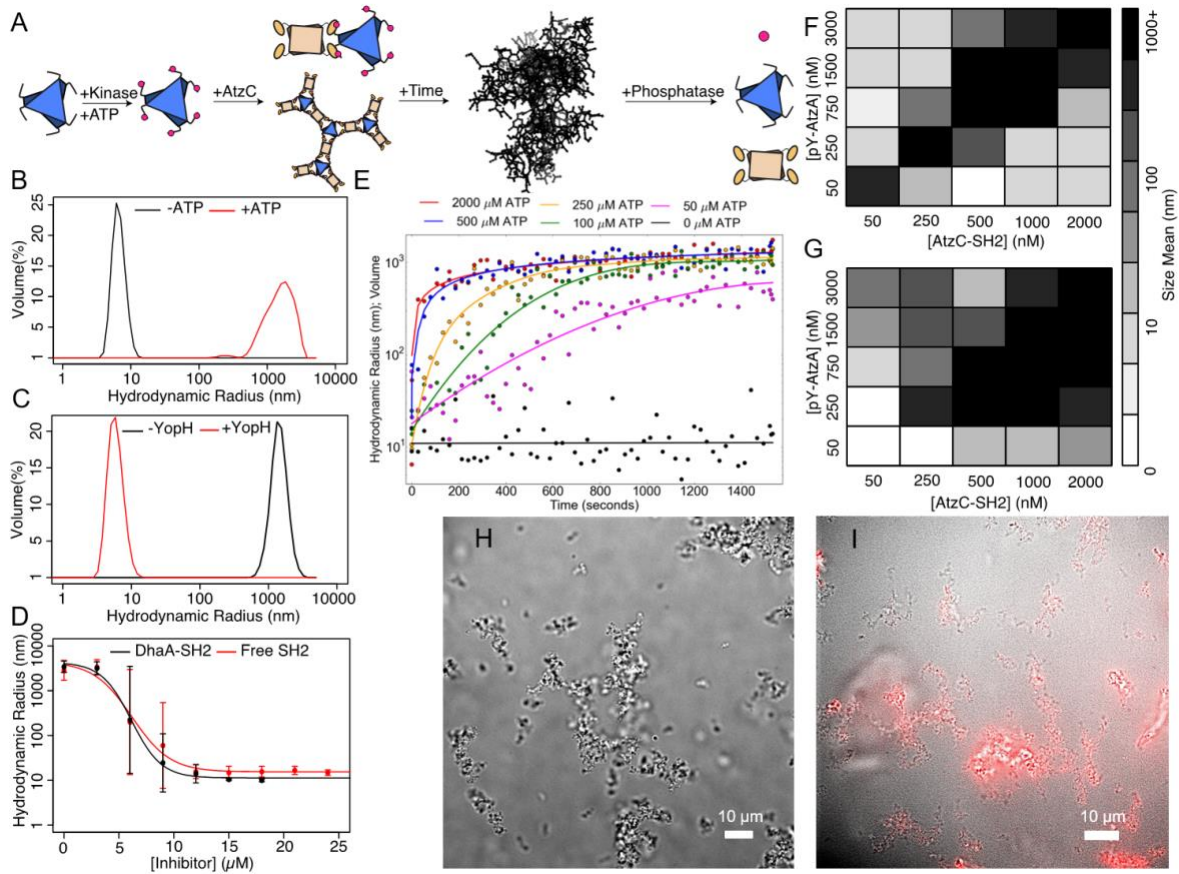

1  
2 Figure 2



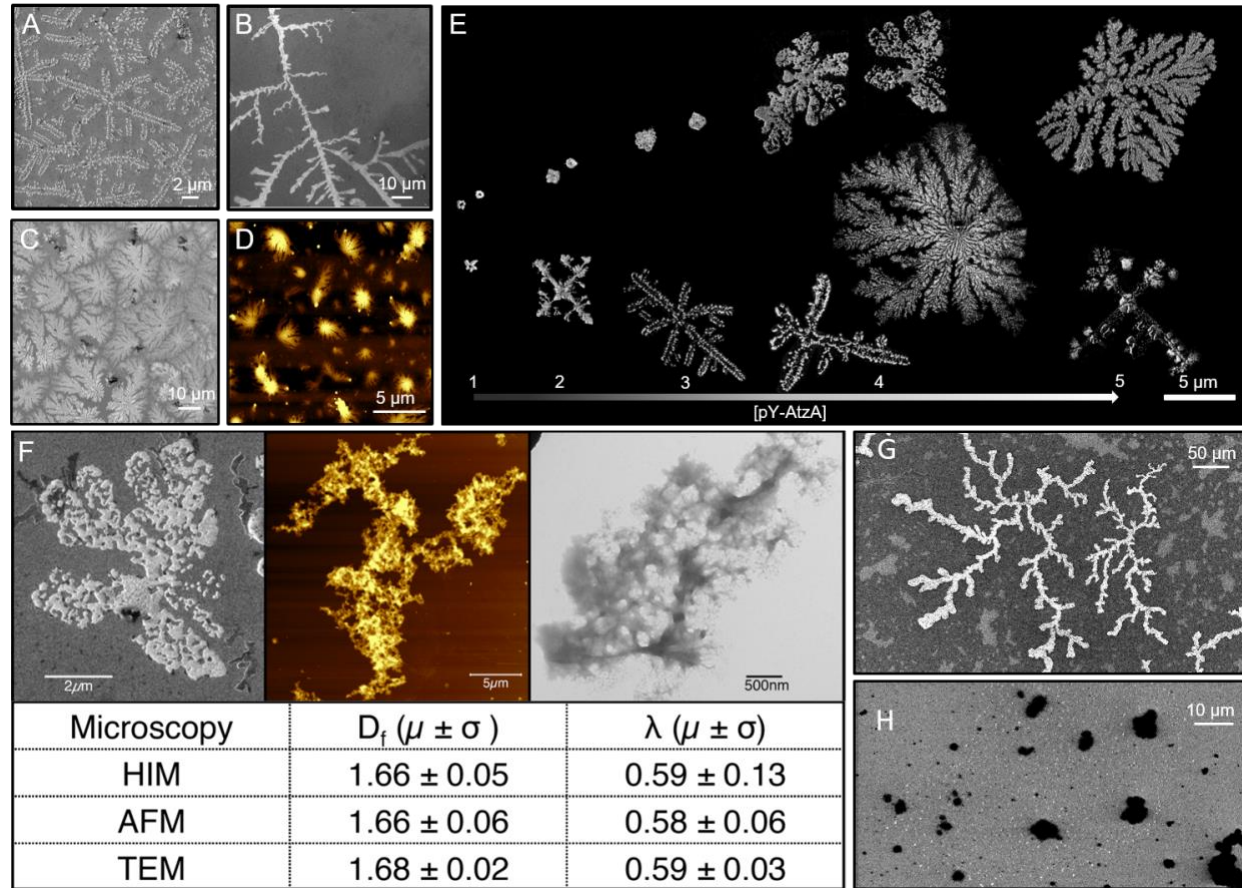

1  
2 Figure 3

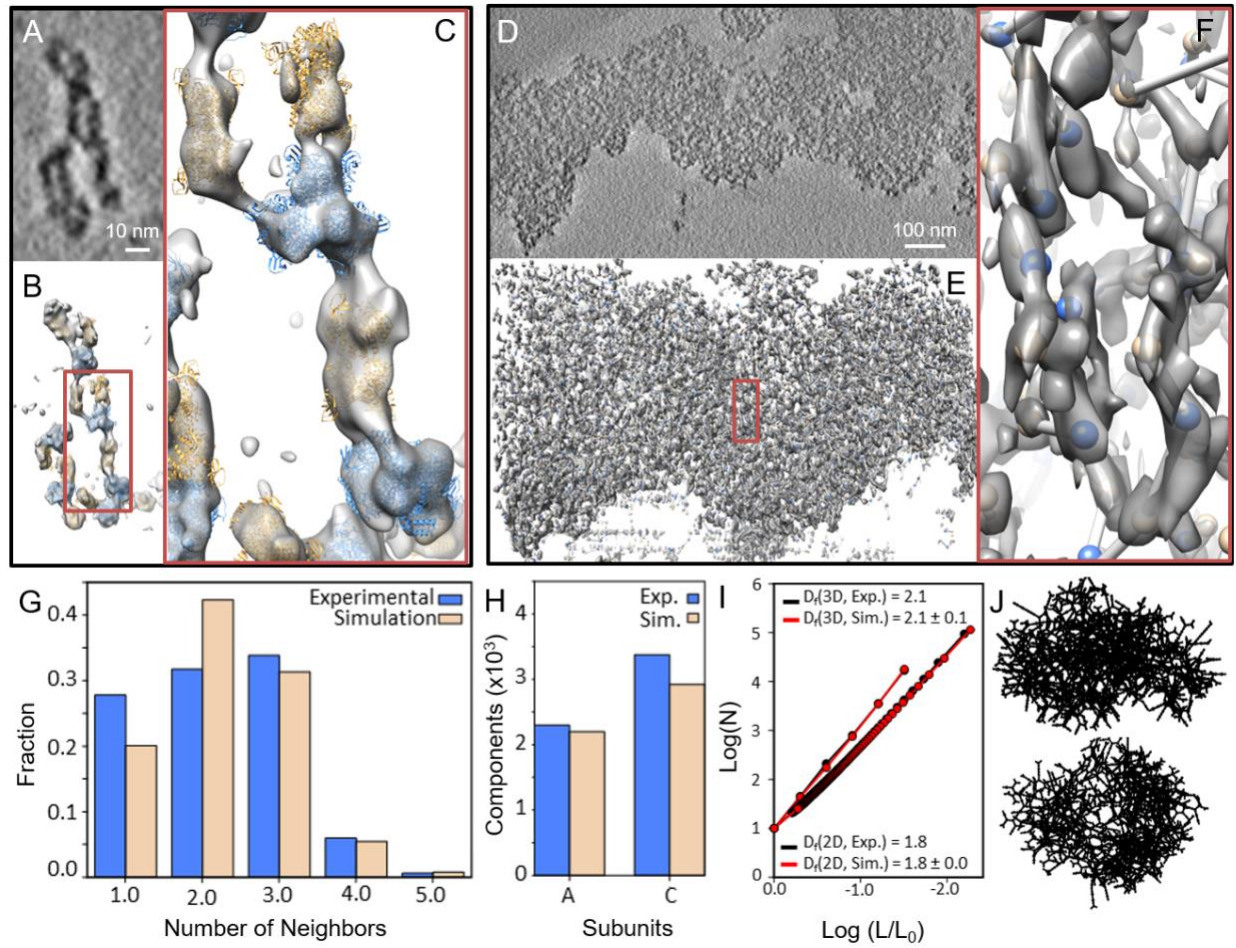

1  
2 Figure 4

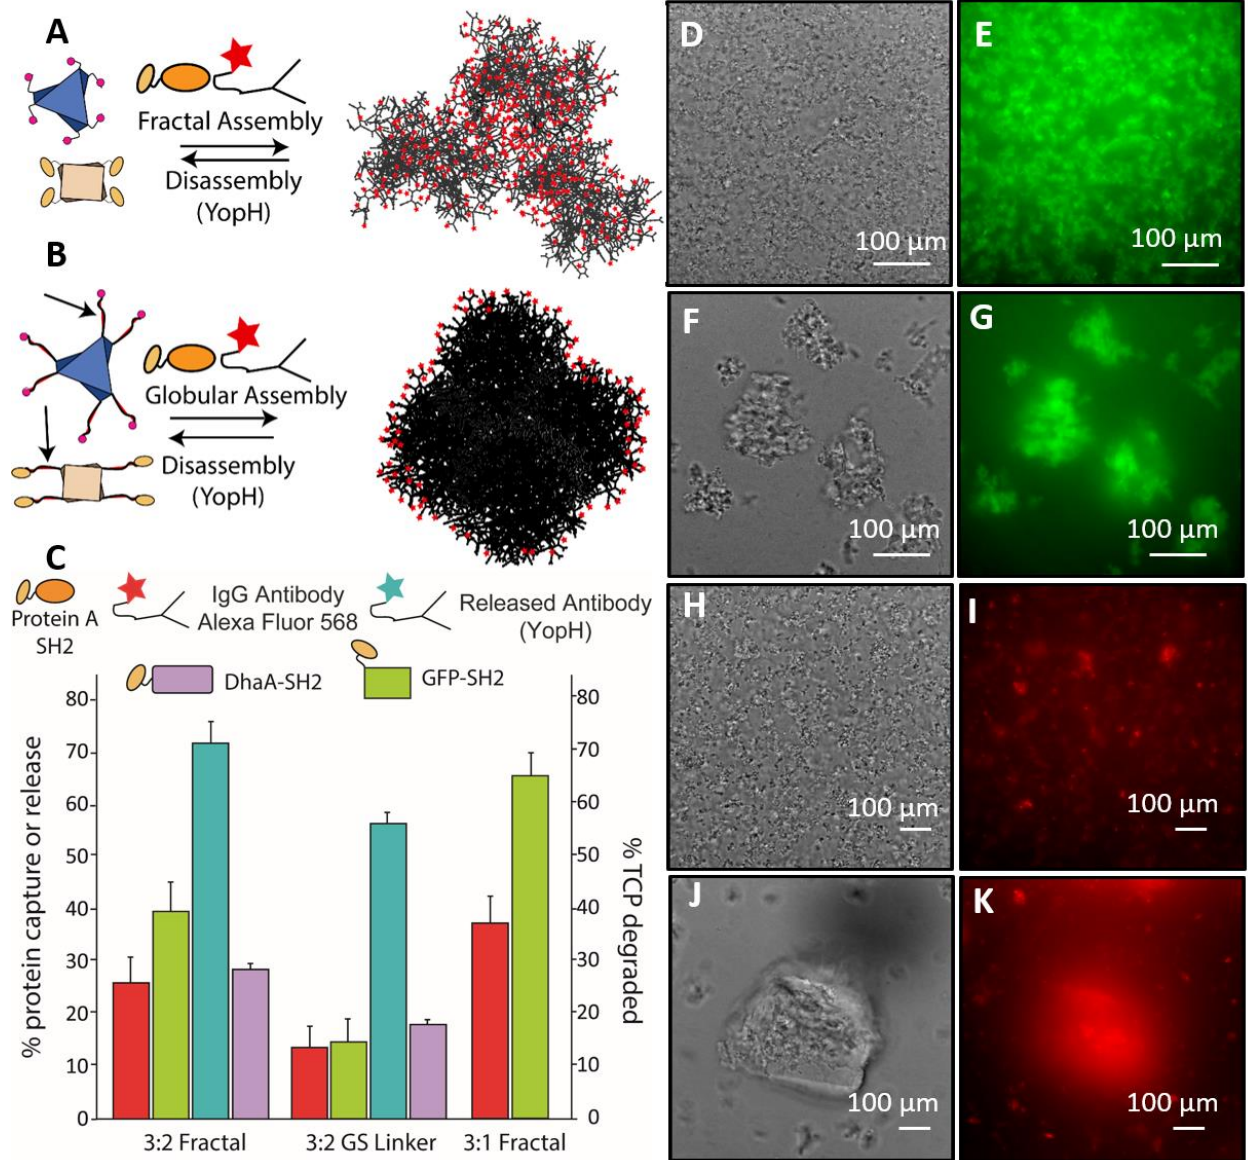

Figure 5

1  
2  
3  
4  
5  
6  
7  
8  
9  
10  
11  
12  
13  
14

1 **References:**

- 2
- 3 1 Mandelbrot, B. B. *The Fractal Geometry of Nature*. (W. H. Freeman & Company, 1982).
- 4 2 Stanley, H. E. & Meakin, P. Multifractal Phenomena in Physics and Chemistry. *Nature* **335**, 405-
- 5 409, doi:DOI 10.1038/335405a0 (1988).
- 6 3 Losa, G. A. *Fractals in biology and medicine. Volume IV*. (Birkhäuser, 2005).
- 7 4 Fairbanks, M. S., McCarthy, D. N., Scott, S. A., Brown, S. A. & Taylor, R. P. Fractal electronic
- 8 devices: simulation and implementation. *Nanotechnology* **22**, doi:Artn 365304
- 9 10.1088/0957-4484/22/36/365304 (2011).
- 10 5 Soleymani, L., Fang, Z. C., Sargent, E. H. & Kelley, S. O. Programming the detection limits of
- 11 biosensors through controlled nanostructuring. *Nat Nanotechnol* **4**, 844-848,
- 12 doi:10.1038/Nnano.2009.276 (2009).
- 13 6 Ge, J., Lei, J. D. & Zare, R. N. Protein-inorganic hybrid nanoflowers. *Nat Nanotechnol* **7**, 428-
- 14 432, doi:10.1038/Nnano.2012.80 (2012).
- 15 7 Zhang, P. C. & Wang, S. T. Designing Fractal Nanostructured Bionterfaces for Biomedical
- 16 Applications. *Chemphyschem* **15**, 1550-1561, doi:10.1002/cphc.201301230 (2014).
- 17 8 Lim, B. *et al.* Pd-Pt Bimetallic Nanodendrites with High Activity for Oxygen Reduction. *Science*
- 18 **324**, 1302-1305, doi:10.1126/science.1170377 (2009).
- 19 9 Cerofolini, G. F., Narducci, D., Amato, P. & Romano, E. Fractal nanotechnology. *Nanoscale Res*
- 20 *Lett* **3**, 381-385, doi:10.1007/s11671-008-9170-0 (2008).
- 21 10 Newkome, G. R. *et al.* Nanoassembly of a fractal polymer: A molecular "Sierpinski hexagonal
- 22 gasket". *Science* **312**, 1782-1785, doi:10.1126/science.1125894 (2006).

- 1 11 Shang, J. *et al.* Assembling molecular Sierpinski triangle fractals. *Nat Chem* **7**, 389-393,  
2 doi:10.1038/Nchem.2211 (2015).
- 3 12 Newkome, G. R. & Moorefield, C. N. From 1 -> 3 dendritic designs to fractal  
4 supramacromolecular constructs: understanding the pathway to the Sierpinski gasket. *Chem Soc*  
5 *Rev* **44**, 3954-3967, doi:10.1039/c4cs00234b (2015).
- 6 13 Shin, S. *et al.* Polymer Self-Assembly into Unique Fractal Nanostructures in Solution by a One-  
7 Shot Synthetic Procedure. *J Am Chem Soc* **140**, 475-482, doi:10.1021/jacs.7b11630 (2018).
- 8 14 Tikhomirov, G., Petersen, P. & Qian, L. Fractal assembly of micrometre-scale DNA origami  
9 arrays with arbitrary patterns. *Nature* **552**, 67-71, doi:10.1038/nature24655 (2017).
- 10 15 Zhang, F., Nangreave, J., Liu, Y. & Yan, H. Reconfigurable DNA origami to generate  
11 quasifractal patterns. *Nano Lett* **12**, 3290-3295, doi:10.1021/nl301399z (2012).
- 12 16 Rothmund, P. W., Papadakis, N. & Winfree, E. Algorithmic self-assembly of DNA Sierpinski  
13 triangles. *PLoS Biol* **2**, e424, doi:10.1371/journal.pbio.0020424 (2004).
- 14 17 Astier, Y., Bayley, H. & Howorka, S. Protein components for nanodevices. *Curr Opin Chem Biol*  
15 **9**, 576-584, doi:10.1016/j.cbpa.2005.10.012 (2005).
- 16 18 Murr, M. M. & Morse, D. E. Fractal intermediates in the self-assembly of silicatein filaments. *P*  
17 *Natl Acad Sci USA* **102**, 11657-11662, doi:10.1073/pnas.0503968102 (2005).
- 18 19 Khire, T. S., Kundu, J., Kundu, S. C. & Yadavalli, V. K. The fractal self-assembly of the silk  
19 protein sericin. *Soft Matter* **6**, 2066-2071, doi:10.1039/b924530h (2010).
- 20 20 Lomander, A., Hwang, W. M. & Zhang, S. G. Hierarchical self-assembly of a coiled-coil peptide  
21 into fractal structure. *Nano Lett* **5**, 1255-1260, doi:10.1021/nl050203r (2005).

- 1 21 Shen, W., Lammertink, R. G. H., Sakata, J. K., Kornfield, J. A. & Tirrell, D. A. Assembly of an  
2 artificial protein hydrogel through leucine zipper aggregation and disulfide bond formation.  
3 *Macromolecules* **38**, 3909-3916, doi:10.1021/ma048348s (2005).
- 4 22 Li, B. *et al.* Nonequilibrium Self-Assembly of pi-Conjugated Oligopeptides in Solution. *ACS*  
5 *Appl Mater Interfaces* **9**, 3977-3984, doi:10.1021/acsami.6b15068 (2017).
- 6 23 McManus, J. J., Charbonneau, P., Zaccarelli, E. & Asherie, N. The physics of protein self-  
7 assembly. *Curr Opin Colloid In* **22**, 73-79, doi:10.1016/j.cocis.2016.02.011 (2016).
- 8 24 King, N. P. *et al.* Computational design of self-assembling protein nanomaterials with atomic  
9 level accuracy. *Science* **336**, 1171-1174, doi:10.1126/science.1219364 (2012).
- 10 25 Hsia, Y. *et al.* Design of a hyperstable 60-subunit protein dodecahedron. [corrected]. *Nature* **535**,  
11 136-139, doi:10.1038/nature18010 (2016).
- 12 26 Suzuki, Y. *et al.* Self-assembly of coherently dynamic, auxetic, two-dimensional protein crystals.  
13 *Nature* **533**, 369-373, doi:10.1038/nature17633 (2016).
- 14 27 Sinclair, J. C., Davies, K. M., Venien-Bryan, C. & Noble, M. E. Generation of protein lattices by  
15 fusing proteins with matching rotational symmetry. *Nat Nanotechnol* **6**, 558-562,  
16 doi:10.1038/nnano.2011.122 (2011).
- 17 28 Padilla, J. E., Colovos, C. & Yeates, T. O. Nanohedra: using symmetry to design self assembling  
18 protein cages, layers, crystals, and filaments. *Proc Natl Acad Sci U S A* **98**, 2217-2221,  
19 doi:10.1073/pnas.041614998 (2001).
- 20 29 Zhang, J., Zheng, F. & Grigoryan, G. Design and designability of protein-based assemblies. *Curr*  
21 *Opin Struc Biol* **27**, 79-86, doi:10.1016/j.sbi.2014.05.009 (2014).

- 1 30 Subramanian, R. H. *et al.* Self-Assembly of a Designed Nucleoprotein Architecture through  
2 Multimodal Interactions. *ACS Cent Sci* **4**, 1578-1586, doi:10.1021/acscentsci.8b00745 (2018).
- 3 31 Churchfield, L. A. & Tezcan, F. A. Design and Construction of Functional Supramolecular  
4 Metalloprotein Assemblies. *Acc Chem Res*, doi:10.1021/acs.accounts.8b00617 (2019).
- 5 32 Sontz, P. A., Song, W. J. & Tezcan, F. A. Interfacial metal coordination in engineered protein and  
6 peptide assemblies. *Curr Opin Chem Biol* **19**, 42-49, doi:10.1016/j.cbpa.2013.12.013 (2014).
- 7 33 Brodin, J. D. *et al.* Metal-directed, chemically tunable assembly of one-, two- and three-  
8 dimensional crystalline protein arrays. *Nat Chem* **4**, 375-382, doi:10.1038/nchem.1290 (2012).
- 9 34 Ringler, P. & Schulz, G. E. Self-assembly of proteins into designed networks. *Science* **302**, 106-  
10 109, doi:10.1126/science.1088074 (2003).
- 11 35 Lindenmayer, A. Mathematical Models for Cellular Interactions in Development .2. Simple and  
12 Branching Filaments with 2-Sided Inputs. *J Theor Biol* **18**, 300-+, doi:Doi 10.1016/0022-  
13 5193(68)90080-5 (1968).
- 14 36 Lindenmayer, A. Mathematical Models for Cellular Interactions in Development .I. Filaments  
15 with 1-Sided Inputs. *J Theor Biol* **18**, 280-+, doi:Doi 10.1016/0022-5193(68)90079-9 (1968).
- 16 37 Glotzer, S. C. & Solomon, M. J. Anisotropy of building blocks and their assembly into complex  
17 structures. *Nat Mater* **6**, 557-562, doi:10.1038/nmat1949 (2007).
- 18 38 Zhang, Z. & Glotzer, S. C. Self-Assembly of Patchy Particles. *Nano Lett* **4**, 1407-1413,  
19 doi:10.1021/nl0493500 (2004).
- 20 39 Kartha, M. J. & Sayeed, A. Phase transition in diffusion limited aggregation with patchy particles  
21 in two dimensions. *Phys Lett A* **380**, 2791-2795, doi:10.1016/j.physleta.2016.06.036 (2016).

- 1 40 Nicolas-Carlock, J. R., Carrillo-Estrada, J. L. & Dossetti, V. Fractality a la carte: a general  
2 particle aggregation model. *Sci Rep-Uk* **6**, doi:ARTN 19505  
3 10.1038/srep19505 (2016).
- 4 41 Guesnet, E., Dendievel, R., Jauffres, D., Martin, C. L. & Yrieix, B. A growth model for the  
5 generation of particle aggregates with tunable fractal dimension. *Physica A* **513**, 63-73,  
6 doi:10.1016/j.physa.2018.07.061 (2019).
- 7 42 Mansbach, R. A. & Ferguson, A. L. Patchy Particle Model of the Hierarchical Self-Assembly of  
8 pi-Conjugated Optoelectronic Peptides. *J Phys Chem B* **122**, 10219-10236,  
9 doi:10.1021/acs.jpcc.8b05781 (2018).
- 10 43 Bianchi, E., Tartaglia, P., Zaccarelli, E. & Sciortino, F. Theoretical and numerical study of the  
11 phase diagram of patchy colloids: ordered and disordered patch arrangements. *J Chem Phys* **128**,  
12 144504, doi:10.1063/1.2888997 (2008).
- 13 44 Lomakin, A., Asherie, N. & Benedek, G. B. Aeolotopic interactions of globular proteins. *Proc*  
14 *Natl Acad Sci U S A* **96**, 9465-9468 (1999).
- 15 45 Vacha, R. & Frenkel, D. Relation between molecular shape and the morphology of self-  
16 assembling aggregates: a simulation study. *Biophys J* **101**, 1432-1439,  
17 doi:10.1016/j.bpj.2011.07.046 (2011).
- 18 46 Bianchi, E., Tartaglia, P., La Nave, E. & Sciortino, F. Fully solvable equilibrium self-assembly  
19 process: fine-tuning the clusters size and the connectivity in patchy particle systems. *J Phys Chem*  
20 *B* **111**, 11765-11769, doi:10.1021/jp074281+ (2007).



- 1 47 Yan, Y., Huang, J. & Tang, B. Z. Kinetic trapping - a strategy for directing the self-assembly of  
2 unique functional nanostructures. *Chem Commun (Camb)* **52**, 11870-11884,  
3 doi:10.1039/c6cc03620a (2016).
- 4 48 Wackett, L. P., Sadowsky, M. J., Martinez, B. & Shapir, N. Biodegradation of atrazine and  
5 related s-triazine compounds: from enzymes to field studies. *Appl Microbiol Biotechnol* **58**, 39-45  
6 (2002).
- 7 49 Kaneko, T. *et al.* Superbinder SH2 domains act as antagonists of cell signaling. *Sci Signal* **5**, ra68,  
8 doi:10.1126/scisignal.2003021 (2012).
- 9 50 Yang, L. *et al.* Computation-Guided Design of a Stimulus-Responsive Multienzyme  
10 Supramolecular Assembly. *Chembiochem* **18**, 2000-2006, doi:10.1002/cbic.201700425 (2017).
- 11 51 Das, R. & Baker, D. Macromolecular modeling with rosetta. *Annu Rev Biochem* **77**, 363-382,  
12 doi:10.1146/annurev.biochem.77.062906.171838 (2008).
- 13 52 Pellegrini, M., Wukovitz, S. W. & Yeates, T. O. Simulation of protein crystal nucleation.  
14 *Proteins* **28**, 515-521 (1997).
- 15 53 Masters, B. R. Fractal analysis of the vascular tree in the human retina. *Annu Rev Biomed Eng* **6**,  
16 427-452, doi:10.1146/annurev.bioeng.6.040803.140100 (2004).
- 17 54 Witten, T. A. & Sander, L. M. Diffusion-Limited Aggregation, a Kinetic Critical Phenomenon.  
18 *Phys Rev Lett* **47**, 1400-1403, doi:DOI 10.1103/PhysRevLett.47.1400 (1981).
- 19 55 Swartz, A. R. & Chen, W. SpyTag/SpyCatcher Functionalization of E2 Nanocages with Stimuli-  
20 Responsive Z-ELP Affinity Domains for Tunable Monoclonal Antibody Binding and

1           Precipitation Properties. *Bioconjug Chem* **29**, 3113-3120, doi:10.1021/acs.bioconjchem.8b00458  
2           (2018).

3   56       Bilgicer, B. *et al.* A non-chromatographic method for the purification of a bivalently active  
4           monoclonal IgG antibody from biological fluids. *J Am Chem Soc* **131**, 9361-9367,  
5           doi:10.1021/ja9023836 (2009).

6   57       Handlogten, M. W., Stefanick, J. F., Deak, P. E. & Bilgicer, B. Affinity-based precipitation via a  
7           bivalent peptidic hapten for the purification of monoclonal antibodies. *Analyst* **139**, 4247-4255,  
8           doi:10.1039/c4an00780h (2014).

9   58       Brangwynne, C. P., Tompa, P. & Pappu, R. V. Polymer physics of intracellular phase transitions.  
10          *Nat Phys* **11**, 899-904, doi:10.1038/Nphys3532 (2015).

11
