# Supplementary material for: Stimulus-responsive Self-Assembly of Protein-Based Fractals by Computational Design
Source: bioRxiv or medRxiv preprint supplement (doi:10.1101/274183), 2019-03-19
Supplement: Supplementary file [file 274183-1.pdf]

1  
2  
3  
4  
5  
6  
7  
8  
  
9  
10  
11  
12  
13  
14  
15  
16  
17  
18  
19  
20  
21  
22  
23  
24  
25  
26  
27

## Supplementary Information

**Title: Stimulus-responsive Self-Assembly of Enzymatic Fractals by Computational Design**

**Authors:**

**Nancy E. Hernández<sup>1,2\*</sup>, William A. Hansen<sup>2\*</sup>, Denzel Zhu<sup>3</sup>, Maria E. Shea<sup>4</sup>, Marium Khalid<sup>5</sup>, Viacheslav Manichev<sup>1,6</sup>, Matthew Putnins<sup>2,5</sup>, Muyuan Chen<sup>7</sup>, Anthony G. Dodge<sup>8</sup>, Lu Yang<sup>1</sup>, Melissa Banal<sup>9</sup>, Torgny Gustafsson<sup>6,10</sup>, Leonard C. Feldman<sup>6,10</sup>, Sang-Hyuk Lee<sup>10</sup>, Lawrence P. Wackett<sup>8,11</sup>, Wei Dai<sup>2,9</sup> and Sagar D. Khare<sup>1,2</sup>.**

nancy.hernandez@rutgers.edu, wah49@scarletmail.rutgers.edu, denzel.zhu@rutgers.edu, mes373@scarletmail.rutgers.edu, mariumkhalid105@gmail.com, v.manichev@rutgers.edu, mputnins@gmail.com, muyuan.chen@bcm.edu, dodg0001@umn.edu, ly118@scarletmail.rutgers.edu, mmb298@scarletmail.rutgers.edu, gustaf@physics.rutgers.edu, l.c.feldman@rutgers.edu, shlee@physics.rutgers.edu, wacke003@umn.edu, wdai@proteomics.rutgers.edu, sagar.khare@rutgers.edu

This PDF file includes:

Supplementary Methods

Supplementary Discussion

Supplementary References

Figs. S1 to S31

Tables S1

Movies S1-S3

1 **Supplementary Methods**

2 **INDEX**

3 **SI 1.X Computational Design**

4 **SI 1.1** Preparation of a two-component scaffold library

5 **SI 1.2** RosettaMatch: simultaneous fusion domain and peptide pair stitching

6 **SI 1.3** Rosetta Design: novel interface design

7 **SI 1.4** Stochastic fractal assembly simulation summary

8 **SI 1.5** Coarse-graining AtzA-C oligomers for stochastic fractal growth simulations

9 **SI 1.6** Stochastic fractal assembly simulation

10 **SI 1.7** Temperature, fraction, and null parameter sweep

11 **SI 1.8** Preparing fractal models for image analysis

12 **SI 1.9** Determining fractal lacunarity and 2-D fractal dimension with ImageJ

13 **SI 1.10** Computational comparison of simulation and tomography fractals from Cryo-EM

14 **SI 2.X Experimental Characterization**

15 **SI 2.1** Creation of the designed AtzA, AtzB, and AtzC fusion constructs

16 **SI 2.2** AtzA and AtzC expression and purification

17 **SI 2.3** AtzB expression and purification

18 **SI 2.4** Src human kinase, super binder SH2 domain, SH2-DhaA expression and  
19 purification

20 **SI 2.5** YopH phosphatase construct, expression, and purification

21 **SI 2.6** Biuret hydrolase and cyanuric acid hydrolase expression and purification

22 **SI 2.7** Enzyme-linked immunosorbent assay (ELISA)

23 **SI 2.8** Bio-layer interferometry (BLI)

24 **SI 2.9** Phosphorylation, assembly formation, and disassembly

25 **SI 2.10** Dynamic light scattering (DLS)

26 **SI 2.11** DLS Inhibition Experiment

27 **SI 2.12** DLS Titration Experiment

28 **SI 2.13** DLS Kinetics (varying ATP) Experiment

1 **SI 3.X Microscopy Experiments**

2 **SI 3.1** Transmission electron microscope (TEM)

3 **SI 3.2** Atomic force microscopy (AFM)

4 **SI 3.3** Helium ion microscopy (HIM)

5 **SI 3.4** High-resolution fluorescence microscopy

6 **SI 3.5** Cryo-EM Tomographic tilt series acquisition and reconstruction

7 **SI 3.6** Cryo-EM AtzAM1 and AtzCM1 model fitting and statistical analysis

8 **SI 4.X Enzymatic Assays**

9 **SI 4.1** Enzymatic activity was measured using the Berthelot assay

10 **SI 4.2** Temperature stress activity assays

11 **SI 4.3** Shaking stress activity assay

12 **SI 4.4** Construction and assay of Basotect® polymer foam with trapped assemblies and  
13 free enzymes

14

15

16

17

18

19

20

21

22

23

24

25

26

27

28

1 **(SI 1.1) Preparation of a two-component scaffold library** – Crystal structure files for AtzA  
2 (PDB:4V1X) and AtzC (PDB:2QT3) were subject to several preparatory scripts to clean,  
3 symmetrize, and process the files for Rosetta Design<sup>1-3</sup>. The processed crystal structure files were  
4 then subject to a Rosetta Fast Relax<sup>4</sup> protocol to obtain starting structures of sufficiently low  
5 Rosetta Energy to serve as starting structures and ideal wild-type models. We created a two-  
6 component (AtzA:monomer and AtzC:monomer) scaffold library where the rigid-body position  
7 of AtzC:tetramer altered with respect to AtzA:hexamer along aligned C<sub>2</sub> symmetry axes via  
8 rotation and translation. To prepare the scaffold library we first aligned the proteins along paired  
9 C<sub>2</sub> symmetry axes (A+B chains for both AtzA and AtzC). We then translated AtzC along the  
10 aligned C<sub>2</sub> symmetry axis until the backbone atoms of each structure were at least 3Å apart to  
11 find the minimum starting distance (125Å). From the minimum starting distance we translated  
12 AtzC(monomer) in intervals of 1Å to a maximum distance of 145Å. To complete the two  
13 component scaffold library, for each translated AtzC(monomer) position we rotated the  
14 AtzC(monomer) about the C<sub>2</sub> symmetry axis by 360° in intervals of 5° for a total of 1440 library  
15 members.

16  
17 **(SI 1.2) RosettaMatch: simultaneous fusion domain and peptide pair stitching** – After visual  
18 inspection of the two-component scaffold library, we noted the accessibility of the AtzA N-  
19 terminus and the AtzC C-terminus along the C<sub>2</sub> symmetry axis (chains A+B). Therefore, we  
20 decided to fuse the N-terminus of an fyn-SH2 super-binder (PDB:1A0T) to the C-terminus of  
21 AtzC and the C-terminus of the fyn-SH2 peptide binding partner to the N-terminus of AtzA. To  
22 achieve the simultaneous fusion, we converted the SH2-peptide crystal structure into an all-C $\alpha$   
23 ‘ligand’ file and used RosettaMatch<sup>5</sup> with geometric constraints to sample all sterically feasible  
24 rigid body placements of the SH2-peptide between each AtzA-AtzC pair in the two-component  
25 scaffold library. The geometric constraints used to coordinate the SH2 domain for simultaneous  
26 fusion were derived from a non-redundant protein library generated by the RCSB-PDB<sup>6</sup>. From N  
27 to C terminus, regardless of secondary structure we collected distances and angles between  
28 backbone atoms (C $\alpha$ , nitrogen, and carboxyl carbon) up to and including 7 residues downstream  
29 (sequence-space) of each residue along the primary structure. The averages and standard  
30 deviations of these distributions were used to place matching constrains between residues of the  
31 AtzA-AtzC termini and the all-C $\alpha$  SH2-peptide ligand. The full-atom SH2-peptide crystal  
32 structure was re-threaded back onto each of the matched SH2-peptide ligands creating 7,005  
33 models with paired termini in proximally close and geometrically favorable positions. Rosetta  
34 GeneralizedKIC (kinematic loop closure)<sup>7</sup> was used to covalently link the paired termini and  
35 generate 3 potential linker-models for each matched SH2-peptide model, creating a library of  
36 21,015 fused and bound AtzA-AtzC pairs.

37  
38 **(SI 1.3) Rosetta Design: novel interface design** – A Rosetta FastRelax protocol was used to  
39 design novel interfaces generated in the previous steps. For each round of the FastRelax protocol  
40 we allowed all residues to sample every rotameric degree of freedom. In addition to rotameric

1 sampling, novel interface residues with a maximum C $\alpha$ -C $\alpha$  interface distance of 6Å and linker  
2 residues were allowed to change residue identity before energy minimization. All but linker  
3 backbone atoms were constrained with atom-coordinate constraints to favor the SH2-peptide  
4 placements determined in the RosettaMatch step. A final visual inspection was made to confirm  
5 the validity of each mutation made during this protocol. Mutations alleviating steric clashes were  
6 widely accepted; spurious mutations with little benefit were reverted to native residue identities  
7 before a subsequent round of repack and energy minimization<sup>8</sup>.

8  
9 **(SI 1.4) Stochastic fractal assembly simulation summary** – In order to better predict the  
10 supramolecular structure and topology we created a stochastic fractal assembly simulation that  
11 utilizes Boltzmann weighted probability distributions for an ensemble of predicted low-energy  
12 binding modes along the C<sub>2</sub>-symmetry axes of the AtzA-AtzC pairs. The algorithm operates by  
13 starting with one oligomer (AtzA for this study) and attaches each complementary oligomer in  
14 layers. The Boltzmann probability distribution was used to decide how the oligomers in each  
15 layer were placed. A few key assumptions were made during the simulations that were based on  
16 chemical intuition. We assumed: 1) The symmetric divalent connection along a C<sub>2</sub>-symmetry  
17 axis (two chains of pY-AtzA bound two chains of AtzC-SH2) would be energetically more likely  
18 than the monovalent connection formed between just one chain from each oligomer—reducing  
19 the probability of monovalent connection to an insignificant value. 2) Flexibility in the linker  
20 region would only lead to variations along the C<sub>2</sub>-symmetry axis via the translation and rotation  
21 parameters used to create the two-component library—maintaining the inherent symmetry found  
22 in either oligomer. 3) Symmetry could but is not required to extend to 3 or 4 component  
23 substructures. Mixed vertex-centered and edge-centered species could occur around a single  
24 AtzA. This would lead to a substructure where two AtzC oligomers have a 180° bound-angle  
25 about AtzA, different from the more symmetric 120° bound-angles. 4) Changes in size and  
26 topology would arise from concentration changes of the enzyme and would need to be  
27 represented in the algorithm. 5) During fractal growth it is possible (and likely) that oligomers in  
28 one layer could come within 125Å (minimum connected distance) of other oligomers within  
29 another layer even if they are not connected. The details of this algorithm are described below.

30  
31 **(SI 1.5) Coarse-graining AtzA-C oligomers for stochastic fractal growth simulations** – We  
32 predicted that fractal growth could continue indefinitely in all directions. To reduce the  
33 computational load and file size of particle models exceeding 100s or even 1000s of oligomers,  
34 we thought to coarse-grain our symmetric oligomers by reducing each chain to just 10  
35 representative points in space (60 and 40 for whole hexamer and tetramer respectively). To  
36 coarse-grain we used a K-means-style clustering algorithm to place the 10 points at locations  
37 with the highest concentration of C $\alpha$  atoms in each monomer (chain A). We then calculated and  
38 applied the symmetric transform to the 10 representative points to obtain a coarse-grained  
39 representation of each oligomer (hexamer and tetramer). When each point is converted into a  
40 sphere with a 12Å radius, the coarse-grained model shows agreement with the overall shape and  
41 size of the full-atom model.

1 **(SI 1.6) Stochastic fractal assembly simulation** – After experimental analysis revealed the best  
2 pY-AtzA and AtzC-SH2 variants we repeated the above Rosetta FastRelax protocol on all  
3 21,015 fused AtzA-AtzC pairs while forcing the sequence identity of the best pY-AtzA and  
4 AtzC-SH2 pair. We generated an energy profile (Figure 1E-F) for conformations whose  
5 evaluated energy scored better than the wild-type components (504 models). Each conformation  
6 was represented by three parameters, translation ( $d$ ), rotation ( $\theta$ ), and axis-binding preference  
7 (vertex or edge centered). The conformations were assigned Boltzmann weighted probabilities  
8 which were used to randomly propagate the coarse grained A-C components during simulation.  
9 We varied the  $kT$  term to obtain a total of 5 different Boltzmann weighted probability  
10 distributions ( $kT = 1, 3, 5, 7, \text{ and } 9$ ). Propagation was achieved by alternating layers of AtzA and  
11 AtzC components starting from an initial seed component (pY-AtzA in this study) which would  
12 continue until either placement of new components was determined either impossible or  
13 improbable or an external criterion was met (number of layers, size of particle, etc.). The  
14 propagation algorithm can be broken into 10 steps at any given layer:

15

16 1) Choose the number of components in the previous layer (or the seed component) based on a  
17 variable fraction with which new complementary oligomers would be placed.

18

19 2) Randomly select individuals from the chosen pool (1) to place new components.

20

21 3) Based on a random generated number from 0.0-1.0, select a matching  $d$ - $\theta$ -axis conformation  
22 via the probability of the conformation.

23

24 4) Randomly select available  $C_2$ -symmetry axes of the individual selected in (2) compatible with  
25 the conformation chosen in (3).

26

27 5) Choose whether or not to keep the selected  $C_2$ -symmetry axis (4) based on a variable null  
28 probability.

29

30 6a) If (5) passes the null, apply the rigid body transformation ( $d$  and  $\theta$ ) to the new member of the  
31 current layer.

32

33 6b) If (5) fails the null, mark the  $C_2$ -symmetry axis (4) of the individual selected in (2) as  
34 unviable and continue.

35

36 7) Repeat 3-6b until all  $C_2$ -symmetry axes of individual (2) are exhausted.

1  
2  
3  
4  
5  
6  
7  
8  
9  
10  
11  
12  
13  
14  
15  
16  
17  
18  
19  
20  
21  
22  
23  
24  
25  
26  
27  
28  
29  
30  
31  
32  
33  
34  
35  
36  
37  
38  
39  
40

8) Perform a coarse grid-based clash check to ensure new layer members are sterically feasible.

9) Repeat 2-8 until all of the individuals chosen in (1) are exhausted.

10) Move to the next layer.

**(SI 1.7) Temperature, fraction, and null parameter sweep** – Varying the fraction (1) and null (5-6b) parameters gave rise to changes in topology and structure. We created 100 fractal models for each combination of fraction (range: 0.1-1.0, interval: 0.1) and null (range: 0.0-0.9, interval: 0.1) using the 5 different Boltzmann weighted probability distributions (with varying temperature)—creating 50,000 total fractal assemblies. An external criterion (15 layer limit) was set during the simulation stage to reduce the computational load of the simulation program as well as on the downstream data processing software. We analyzed each particle's individual size, number of layers, AtzA branch ratio (number of AtzC units bound to a unit of AtzA), lacunarity, and dimensionality (Df) from a 2D image. For every combination of temperature, fraction, and null we averaged the data across the 100 fractal assemblies. The results can be found in Figure S1 and S2.

**(SI 1.8) Preparing fractal models for image analysis** – Each fractal assembly was passed through a deterministic PyMOL script that would color the assembly black, convert the background white, show as spheres of scale 12Å, orient the image such that the longest diameters are in the X-Y plane, remove the glossy lighting and shine from the sphere models, and finally ray-trace render the image.

**(SI 1.9) Determining fractal lacunarity and 2-D fractal dimension with ImageJ** - The FracLac package<sup>o</sup> designed for ImageJ<sup>o</sup> was used to determine both the 2D lacunarity and fractal dimension (Df). With FracLac mode on, outside of the standard parameters, we checked the 'alternate random generator' box and allowed the minimum pixel size to be 1, and the color code was turned off. We then ran in batch-mode to process all of the fractal images. ImageJ outputs four files: summary, box count per grid, scan types, and batch data. Lacunarity and dimension were taken from the summary file for the parameter sweep while the 2D log vs log plot values were taken from the box counting grid file ( $\epsilon$  and  $F$ ).

**(SI 1.10) Computational comparison of simulation and tomography fractals from Cryo-EM** – Fitting of the experimentally computed protein density (Cryo-EM tomography) resulted in Cartesian coordinates representing the center of mass of the oligomeric components. To compare the experimental results to simulation we ran the simulation until at least a total of 5000 components were present in the model and calculated the geometric centers for all oligomeric components in the coarse-grained assembly to create new center-of-mass models. Using the

1 experimentally derived Cartesian coordinates and the center-of-mass models we performed a  
2 computational analysis (see Cryo-EM fitting and statistical analysis below) to evaluate the fractal  
3 size, nearest component neighbor distances, and relative AtzA-AtzC ratio (Fig. 3H,I). We  
4 analyzed the 3D fractal dimension (Fig. 3J) with a 3D box counting program that counts the  
5 number of geometric centers within a scaling (doubling) box size. The 2D fractal dimension (Fig.  
6 3J) was calculated in the same way as previously mentioned. We found highest agreement of  
7 simulations with  $kT = 9$ ,  $P_{\text{null}} = 0.1$ , and  $C_{\text{frac}} = 1.0$ . An array of fractal images that represent the  
8 average fractal for each value of  $P_{\text{null}}$  and  $C_{\text{frac}}$  at  $kT = 9$  can be found in Figure S2.

9  
10 **(SI 2.1) Creation of the designed AtzA, AtzB, and AtzC fusion constructs** – The DNA  
11 sequence of the full-length *atzA* was amplified from the *pMD4::atzA*; *atzB* amplified from  
12 *pAAJLS3::atzB*; and *atzC* was amplified from *pKK223-3::atzC*.<sup>11-14</sup> The Src kinase activator  
13 phosphopeptide sequence, EPQYEEIPIYL, was created by ordering two complementary primers  
14 that formed a linear fragment encoding the peptide sequence, used with the amplified *atzA* gene  
15 and inserted into the linearized *pET15b+* vector through Gibson Assembly.<sup>15</sup> The Fyn SH2  
16 superbinder gene was ordered as a gBlock fragment<sup>15,16</sup> and inserted into *pET29b+* (linearized with  
17 *NdeI* and *XhoI*) using Gibson Assembly. The Fyn SH2 amplified gene was designed to be placed  
18 on the C-terminal side of the *pET15b+::atzB* and *pET29b+::atzC* with a flexible GSS linker  
19 between the proteins. The Fyn SH2 superbinder amplified gene *SH2* and the *atzC* amplified gene  
20 were both inserted into the *pET29b+* linear vector using Gibson Assembly. The *atzB**SH2* fusion  
21 gene was ordered as a Gibson fragment<sup>15</sup> and inserted into the *pET15b+* linear vector using  
22 Gibson Assembly. Point mutations were introduced using the QuickChange Site-Directed  
23 Directed Mutagenesis Kit (Agilent Technologies) to create the final designs for AtzA and AtzC  
24 models. DNA sequencing was used to confirm proper insertion and mutations (Genscript).

25  
26 **(SI 2.2) AtzA and AtzC expression and purification** – The *pET15b+::atzA* and  
27 *pET29b+::atzC* plasmids were co-transformed into *Escherichia coli* BL21 (DE3) with *pAG*  
28 plasmid containing genes for the chaperone proteins, *groEL* and *groES*.<sup>17</sup> For expression of the  
29 AtzA models a 10 mL LB culture with 30  $\mu\text{g}/\text{mL}$  of chloramphenicol and 100  $\mu\text{g}/\text{mL}$  of  
30 ampicillin was inoculated with a single colony and incubated overnight at 37°C and 250 rpm.  
31 For the expression of the AtzC models a 10 mL LB culture with 30  $\mu\text{g}/\text{mL}$  of chloramphenicol  
32 and 50  $\mu\text{g}/\text{mL}$  of kanamycin was inoculated. After growing overnight, the 10 mL cultures of the  
33 AtzA and AtzC models were used to inoculate 500 mL of LB media, which was grown at 37°C  
34 to an  $\text{OD}_{600}$  of 0.5-0.6, at which point the expression of chaperones was induced with the addition  
35 of 1% (wt/vol) L-arabinose and grown for an additional 1-2 hours at 16°C. Expression of the  
36 AtzA and AtzC models was then induced with 0.1 mM IPTG (isopropyl- $\beta$ -D-thiogalacto-  
37 pyranoside) and grown overnight at 16°C. All subsequent steps were performed at 4°C. Cells  
38 were centrifuged at 6,000 x g for 30 min. Cell pellets were re-suspended in 30 mL of 25 mM  
39 HEPES, 200 mM NaCl, 5% glycerol, 40 mM imidazole, pH 7.5, and lysed by sonication. Cell  
40 extracts were obtained by centrifugation at 50,000 x g for 30 min at 4°C. Protein purification was  
41 performed using 5 mL Ni-NTA agarose resin (Qiagen) equilibrated with 10 mL of 25 mM  
42 HEPES, 200 mM NaCl, 5% glycerol, 40 mM imidazole, pH 7.5. The lysate was applied to the



1 resin, the resin was washed with 45 mL of the same buffer, and the protein eluted with 20 mL of  
2 25 mM HEPES, 200 mM NaCl, 5% glycerol, 400 mM imidazole, pH 7.5. The purified protein  
3 was buffer exchanged (PD10-desalting column, GE Healthcare #17085101) into 50 mM HEPES,  
4 100 mM NaCl, 5% glycerol, pH 7.4 (HNG). AtzA was expressed in high yields and precipitated  
5 if the buffer was not exchanged quickly. Proteins were frozen using liquid nitrogen and stored at  
6 -80°C. All proteins precipitated if dialyzed in HNG for 2 hours.

7  
8 **(SI 2.3) AtzB expression and purification** – The *pET15b+::atzB<sub>SH2</sub>* plasmid was transformed  
9 into *E.coli* BL21 (DE3) cells. For expression of AtzB, a 10 mL LB culture with 100 µg/mL of  
10 ampicillin was inoculated overnight at 37°C and 250 rpm. The 10 mL overnight culture was used  
11 to inoculate 500 mL of LB media which was grown to an OD<sub>600</sub> of 0.5-0.7 and induced with 1  
12 mM IPTG and grown overnight at 16°C. The same purification protocol for the AtzA and AtzC  
13 models was used for AtzB. AtzB<sub>SH2</sub> did not express if grown with zinc sulfate, as had been  
14 done customarily in previous literature.<sup>13</sup>

15  
16 **(SI 2.4) Src human kinase, super binder SH2 domain, SH2-DhaA expression and**  
17 **purification** – The expression plasmid for Src human kinase<sup>8</sup> (gift from John Chodera, Nicholas  
18 Levinson, and Markus Seeliger. Addgene plasmid # 79700 was co-transformed with the  
19 expression plasmid for *Yersinia* YopH protein tyrosine phosphatase (PTPase)<sup>8</sup> (gift from John  
20 Chodera, Nicholas Levinson, and Markus Seeliger, Addgene plasmid # 79749) into *E. coli*  
21 Rosetta2 (DE3) (Novagen). For Src kinase expression a 10 mL LB culture with 50 µg/mL  
22 spectinomycin and 100 µg/mL of ampicillin was inoculated with a single colony and incubated  
23 overnight at 37°C, 250 rpm. The overnight culture was used to inoculate 500 mL of LB media  
24 which was grown to an OD<sub>600</sub> of 0.5-0.7 and induced with 1mM IPTG and grown overnight at  
25 18°C. The super binder SH2 domain and SH2-DhaA were transformed into *E. coli* BL21 (DE3)  
26 and expressed in the same way as the Src kinase above. Purification for the Src kinase was  
27 performed similarly and with the same buffers as AtzAM1, AtzB<sub>SH2</sub>, and AtzCM1. While, the  
28 super binder SH2 domain and SH2-DhaA were purified with the same purification protocol but  
29 with the following buffers: a wash buffer containing 137 mM NaCl, 2.7 mM KCl, 10 mM  
30 Na<sub>2</sub>HPO<sub>4</sub>, 2 mM KH<sub>2</sub>PO<sub>4</sub>, pH 7.4, 20 mM imidazole and an elution buffer containing 137 mM  
31 NaCl, 2.7 mM KCl, 10 mM Na<sub>2</sub>HPO<sub>4</sub>, 2 mM KH<sub>2</sub>PO<sub>4</sub>, pH 7.4, 200 mM imidazole. All proteins  
32 were buffer exchanged into HNG, frozen in liquid nitrogen and stored at -80°C.

33  
34 **(SI 2.5) YopH phosphatase construct, expression, and purification** – The linear catalytic  
35 domain *YopH* gene (residues 164-468) was amplified from *pET13S-A::YopH*<sup>8</sup> and inserted with  
36 Gibson Assembly into a linearized pET15b+ vector. A 10 mL LB culture with 100 µg/mL of  
37 ampicillin was inoculated with a single colony and incubated overnight at 37°C. The expression  
38 and purification protocol is the same as the protocol used for the Src kinase.

1 **(SI 2.6) Biuret hydrolase and cyanuric acid hydrolase expression and purification** – Biuret  
2 hydrolase (BH)<sup>9</sup> expression strain (*E. coli* DH5 $\alpha$ ) and the *Moorella* Cyanuric acid hydrolase  
3 (CAH)<sup>20</sup> strain (*E. coli* BL21 (DE3)) were provided by Dr. Larry Wackett. A 10 mL culture with  
4 50  $\mu$ g/mL of kanamycin was inoculated for both BH and CAH and incubated at 37°C until OD<sub>600</sub>  
5 of 0.5-0.7 and induced with 1 mM IPTG for 4 hours at 37°C, 250 rpm. The expression and  
6 purification protocol is the same as the protocol used for the Src kinase.

7

8 **(SI 2.7) Enzyme-linked immunosorbent assay (ELISA)** – Phosphorylated AtzAM1 (pY-  
9 AtzAM1) was loaded onto clear flat-bottom immuno 96-well plates (Thermo Scientific item #  
10 442404) at 20 $\mu$ g/mL and 1.25 $\mu$ g/mL in 50 $\mu$ L 1X PBS (Gibco pH 7.4, #10010023) overnight at  
11 4°C. Plates were rinsed twice in 200 $\mu$ L 1X TBS (Biorad #1706435). 1% BSA in TBS 0.05%  
12 Tween 20 was used to block wells at 200 $\mu$ L block solution for 1.5hr at 25°C under gentle  
13 agitation. Anti-phosphotyrosine 4G10 Platinum HRP conjugate (EMD #16-316) was diluted  
14 1:5000 in 1% BSA TBS 0.05% Tween 20 and loaded onto the well at 25°C for 1.5hr under  
15 gentle agitation. Excess anti-phosphotyrosine was washed off with 200 $\mu$ L of TBS 0.05% Tween  
16 20 in triplicate. To detect bound antibody, 100 $\mu$ L of TMB substrate reagent (Biolegend  
17 #421101) was added to each well and incubated for 5 minutes at 25°C. 100 $\mu$ L of TMB stop  
18 solution (Biolegend #423001) was added to the wells. Absorbance was read at 450nm using the  
19 Tecan Infinite M200 Pro plate reader.

20

21 **(SI 2.8) Bio-layer interferometry (BLI)** – AtzAM1 was phosphorylated using the conditions  
22 described below. pY-AtzAM1 was then biotinylated at 10mM Sulfo-NHS-Biotin (APEX<sup>BIO</sup>) for  
23 30min at 25°C. Excess biotin was buffer exchanged with a PD-10 desalting column (GE  
24 Healthcare) equilibrated with HNG. Biotinylated pY-AtzAM1 was loaded onto streptavidin (SA)  
25 coated biosensors (ForteBio) and used for BLI. AtzCM1 was flowed in from 4nM to 4 $\mu$ M. BLI  
26 experiments were performed using the BLItz System (ForteBio).

27

28 **(SI 2.9) Phosphorylation, assembly formation, and disassembly** – The phosphorylation  
29 protocol was based upon Src kinase activity assay by Sigma (Catalog # S1076). In a final  
30 reaction volume of 150 $\mu$ L, 3 $\mu$ M AtzAM1 was mixed into 1X Kinase Activity Buffer (4mM  
31 MgCl<sub>2</sub>, 2.5mM MnCl<sub>2</sub>, 0.25mM DTT, 5mM MOPS, 2.5mM glycerol-2-phosphate, 1mM EGTA,  
32 400nM EDTA, pH 7.6), 2.5 mM MnCl<sub>2</sub>, HNG, 2 mM ATP, 800ng Src kinase, and incubated for 7  
33 – 16 hr at 25°C for phosphorylation to occur. After phosphorylating, AtzCM1 was added to a  
34 final 2 $\mu$ M concentration. Assembly was allowed to form at 2hr 25°C. Disassembly was  
35 performed by adding 4.8 $\mu$ g of YopH phosphatase into the 150 $\mu$ L reaction mixture after assembly  
36 formation occurred. Size measurements using DLS were performed to determine assembly  
37 formation/disassembly.

38

1 **(SI 2.10) Dynamic light scattering (DLS)** – 50  $\mu\text{L}$  of an assembly sample was used for size  
2 determination using a Malvern Zetasizer and a quartz cuvette (ZEN2112, Malvern). Ten spectra  
3 measures were recorded for eleven replicates at 25 °C. The standard operating procedure  
4 accounted for 5% glycerol in solution.

5  
6 **(SI 2.11) DLS Inhibition Experiment** - 6  $\mu\text{M}$  pY-AtzAM1 was phosphorylated (1X KAB, 2  
7 mM ATP, 1 mM DTT, HNG, 1  $\mu\text{g}$  Src kinase) in a reaction volume of 75  $\mu\text{L}$ . Incubation time  
8 was overnight at 25°C. SH2 or SH2-DhaA was added to each sample at 0  $\mu\text{M}$ , 3  $\mu\text{M}$ , 6  $\mu\text{M}$ , 9  
9  $\mu\text{M}$ , 12  $\mu\text{M}$ , 15  $\mu\text{M}$ , 18  $\mu\text{M}$  final concentration and allowed to “block” binding sites on the pY-  
10 AtzAM1 for 1 hr at 25°C. AtzCM1 was added to each sample at 2  $\mu\text{M}$  final concentration.  
11 Therefore, the final concentrations of all components was 3  $\mu\text{M}$  pyAtzA, 1  $\mu\text{M}$  AtzCM1, 0  $\mu\text{M}$  -  
12 18  $\mu\text{M}$  SH2 or SH2-DhaA. The sample was incubated for 2 hr at 25°C. DLS was performed to  
13 analyze assembly sizes. DLS was performed at 25°C, 50  $\mu\text{L}$ /sample volume, in a low-volume  
14 quartz sizing cuvette (Malvern; ZEN2112) using a Zetasizer Nano ZS (Malvern). Measurements  
15 were performed in triplicates while each sample was read and averaged 15 times. This protocol  
16 was repeated at a final concentration of 1  $\mu\text{M}$  pyAtzA, 0.66  $\mu\text{M}$  AtzCM1, 0  $\mu\text{M}$  -6  $\mu\text{M}$  SH2-  
17 DhaA. Curve fitting was performed in MATLAB (R2016b; Mathworks) using the general  
18 model:

$$f(x) = \frac{A}{1 + e^{-k*(x-x_0)}} + B$$

19  
20 where  $A$ ,  $B$ ,  $k$ ,  $x_0$  are constants. Adjusted  $R^2$  was used to determine model validity. Inhibition  
21 concentration 50 (IC50) was determined based upon concentration of inhibitor that resulted in  
22 assembly size of 100nm measured.

23  
24 **(SI 2.12) DLS Titration Experiment** – 6  $\mu\text{M}$ , 3  $\mu\text{M}$ , 1.5  $\mu\text{M}$ , 0.5  $\mu\text{M}$ , 0.1  $\mu\text{M}$  pyAtzA was  
25 phosphorylated (as described previously) with an incubation time of overnight at 25°C. Either  
26 AtzCM1 wildtype (WT) or AtzCM1 superbinder (SB) was added to each sample at 2  $\mu\text{M}$ , 1  $\mu\text{M}$ ,  
27 0.5  $\mu\text{M}$ , 0.25  $\mu\text{M}$ , 0.50  $\mu\text{M}$  final concentration. The sample was allowed to incubate for 2 hr at  
28 25°C. Therefore, the final concentrations of all components was from 3  $\mu\text{M}$  – 0.05  $\mu\text{M}$  pyAtzA,  
29 2  $\mu\text{M}$  – 0.05  $\mu\text{M}$  AtzCM1-WT or AtzCM1-SB. DLS was performed at 25°C, 50  $\mu\text{L}$ /sample  
30 volume, in a low-volume quartz sizing cuvette (Malvern; ZEN2112) using a Zetasizer Nano ZS  
31 (Malvern). Measurements were performed in duplicate with each sample read and averaged 15  
32 times.

33  
34 **(SI 2.13) DLS Kinetics (varying ATP) Experiment** – An assembly mixture of 3  $\mu\text{M}$  non-  
35 pyAtzA and 2  $\mu\text{M}$  AtzCM1 was prepared (as described previously) and syringe-filtered at 0.22  
36  $\mu\text{m}$ . To each 50  $\mu\text{L}$  reaction volume, 1.2  $\mu\text{g}$  of src kinase was added. Size was monitored  
37 continuously for 30 min at 25°C in a low-volume quartz sizing cuvette (Malvern; ZEN2112)  
38 using a Zetasizer Nano ZS (Malvern) at 50  $\mu\text{L}$ /sample. Measurements were performed in  
39 triplicates. Each sample was read and averaged five times over the course of 25 seconds for a

1 single time point. Curve fitting was performed in MATLAB (R2016b; Mathworks) using sloping  
2 spline function, with varying smoothing parameters. Adjusted  $R^2$  was used to determine model  
3 validity.

4

5 **(SI 3.1) Transmission electron microscope (TEM)** – Assembly ( $3 \mu\text{M}$  pY-AtzAM1 and  $2 \mu\text{M}$   
6 AtzCM1) and non-assembly ( $3 \mu\text{M}$  non-pyAtzA and  $2 \mu\text{M}$  AtzCM1) samples were mixed, and  
7 diluted ten-fold in deionized water. The diluted samples were applied to the carbon-coated  
8 FCF400-Cu grids (Electron Microscopy Sciences, Hatfield, PA) which were glow-discharged for  
9 two hours under UV light to render the grids hydrophilic and adsorptive. A drop of sample  
10 ( $\sim 5 \mu\text{L}$ ) was added on a piece of wax film and the grid was placed onto the sample droplet for  
11 absorption for two minutes. Excess sample solution was removed with a filter paper. A drop  
12 ( $\sim 5 \mu\text{L}$ ) of 1% uranyl acetate was dropped on the wax paper and the grid was placed onto the  
13 staining solution droplet for two minutes to stain. Excess staining solution was removed by  
14 blotting with a filter paper, the grids were allowed to air dry for two minutes. Images were  
15 collected on JEOL 1200EX electron microscope with AMT-XR41 digital camera.

16

17 **(SI 3.2) Atomic force microscopy (AFM)** – The assemblies were directly visualized by non-  
18 contact mode atomic force microscopy (AFM) Parks Systems. Samples were prepared by  
19 depositing  $20 \mu\text{L}$  of sample on silicon wafer and incubated for 5 minutes. After incubation, the  
20 silicon was washed with deionized water to remove salt and air dried overnight at  $25^\circ\text{C}$ .  
21 Assemblies were visualized by an AFM (Parks System). The AFM was used in non-contact mode  
22 ( $330 \text{ kHz}$  resonant frequency and  $42 \text{ N/m}$  spring constant, PPP-NCHR Park Systems, #610-  
23 1051). Images were taken with  $2048 \times 2048$  pixels with scan rates of  $2 \mu\text{m/s}$  to  $30 \mu\text{m/s}$ . The  
24 AFM images analysis was performed using Gwyddion software<sup>21</sup>.

25

26 **(SI 3.3) Helium ion microscopy (HIM)** – The AFM sample preparation on a silicon wafer was  
27 used for HIM. Imaging was done on the Carl Zeiss Orion Plus Helium Ion Microscope (Carl  
28 Zeiss Microscopy, Peabody, MA) operating at  $30 \text{ KeV}$  acceleration voltage with a beam currents  
29 of about  $1 \text{ pA}$ . Most samples did not exhibit significant charging therefore electron flood gun  
30 was not used for charge neutralization. The vacuum reading in the analysis chamber during  
31 imaging was  $2 \times 10^{-7}$  torr.

32

33 **(SI 3.4) High-resolution fluorescence microscopy** – For the growth video,  $20 \mu\text{L}$  of  $3 \mu\text{M}$   
34 AtzAM1 and  $2 \mu\text{M}$  AtzCM1 sample (with all the required buffers as described previously) was  
35 deposited on a glass cover and  $0.2 \mu\text{m}$  of Src kinase was added to the sample to allow for  
36 assembly formation to occur. The sample was monitored for an hour. For the 3-component  
37 assembly image ( $3 \mu\text{M}$  pY-AtzAM1,  $1 \mu\text{M}$  AtzBSH2,  $2 \mu\text{M}$  AtzCM1) the AtzBSH2 protein was  
38 dye labeled with the Alexa Fluor™ 647 NHS Ester (Succinimidyl Ester, ThermoFisher Scientific

1 #A2006) and buffer exchanged into HNG with a PD10-desalting column. Fluorescent images  
2 along with bright-field images were collected. Images were captured using a Nikon Ti-E inverted  
3 microscope. A Coherent Genesis laser at 567 and Coherent Obis Laser at 647 were used for  
4 fluorescent imaging, using 1mW power.

5

6 **(SI 3.5) Cryo-EM Tomographic tilt series acquisition and reconstruction** – For cryo-electron  
7 tomography, an AtzAM1 and AtzCM1 assembly sample was mixed with 10 nm gold fiducial  
8 markers to facilitate alignment in data processing. An aliquot of 3.5ml sample was applied to  
9 2.0/1.0mm Quantifoil holey grids (Quantifoil, Germany) and plunge frozen using a Leica EM GP  
10 plunger (Leica). Tomographic tilt series acquisition was performed on a Talos Arctica  
11 microscope (Thermal Fisher) operated at an acceleration voltage of 200kV. This microscope was  
12 equipped with a field-emission gun, Volta phase plates, Gatan postcolumn energy filter and a K2  
13 summit direct electron detector. Tilt series were collected at 39,000x microscope magnification  
14 with  $-0.5 \mu\text{m}$  defocus using FEI Tomography software. The sampling of the data was calibrated  
15 to be  $3.49 \text{ \AA}/\text{pixel}$ . Typically, a tilt series ranged from  $-60^\circ$  to  $60^\circ$  at  $3^\circ$  step increment. The  
16 accumulated dose for each tilt series was  $60 \text{ electrons}/\text{\AA}^2$ . Tilt series were aligned based on  
17 fiducial gold markers using the IMOD package<sup>22</sup>. 3D tomograms were obtained by weighted  
18 backprojection of aligned tilt series. Visualization and annotation of the 3D volumes were done  
19 in Chimera<sup>23</sup>.

20

21 **(SI 3.6) Cryo-EM AtzAM1 and AtzCM1 model fitting and statistical analysis** – AtzAM1 and  
22 AtzCM1 complex subtomograms were extracted from 3D tomograms and bandpass filtered to  
23 reduce high frequency noises and low frequency gradient from ice thickness variation. Centers of  
24 AtzAM1 and AtzCM1 densities were identified as peaks within solid voxel clusters that were  
25 approximately sizes of an AtzAM1 hexamer, or an AtzCM1 tetramer. Potential free AtzAM1 or  
26 AtzCM1 complexes that were too close to a neighboring voxel peak ( $<120\text{\AA}$ ) were removed.  
27 Assignment of AtzAM1 or AtzCM1 to an identified voxel cluster was done by applying the  
28 condition that AtzAM1 and AtzCM1 alternate in a chain. Densities that had three or more linkers  
29 to neighbors were assigned to be AtzAM1. Linear, unbranched assemblies were assigned by first  
30 determining identity of one end based on cross-correlation scores between the end peak densities  
31 and AtzAM1 or AtzCM1 models computed from their PDB structures. Assignment conflicts  
32 were resolved by pruning along the branches in the order of intensity values. The above protocol  
33 was first applied to a small assembly, and optimized and validated by human visual inspection  
34 before it was used on larger assemblies. Coordinates and connection information of each  
35 AtzAM1 or AtzCM1 complex in an assembly were extracted and used for statistical analysis and  
36 for comparison to simulation data. The volume of the assembly is defined by the volume of the  
37 convex hull that encloses all determined AtzAM1 or AtzCM1 molecule.

38

39 **(SI 4.1) Enzymatic activity was measured using the Berthelot assay** – Assembled enzyme  
40 samples ( $1.5 \mu\text{M}$  AtzAM1,  $0.5 \mu\text{M}$  AtzBSH2, and  $1 \mu\text{M}$  AtzCM1) were made by incubating the  
41 enzymes in 1X kinase activity buffer (with no DTT),  $2.5 \text{ mM}$   $\text{MnCl}_2$ , HNG,  $0.2 \mu\text{M}$  Src kinase,  
42 and  $2 \text{ mM}$  ATP in a total volume of  $500 \mu\text{l}$  at  $25^\circ\text{C}$  for four hours. The unassembled enzyme

1 samples were prepared using the same conditions, except no ATP was added to the sample. DLS  
2 was performed to verify assembly formation. 10  $\mu\text{L}$  of 20 mM Atrazine dissolved in methanol  
3 was added to each 500  $\mu\text{L}$  sample, for a final concentration of 400  $\mu\text{M}$  atrazine, and another  
4 sample with the same conditions had no substrate added in order to establish a baseline  
5 measurement. Each condition was done in triplicate. After the addition of substrate, the samples  
6 are shaken at 100 RPM for 1.5 hr at 25°C. 140  $\mu\text{L}$  of each sample is transferred to PCR tubes,  
7 then boiled at 99°C for 1.5 minutes, and then cooled at 4°C. The 140  $\mu\text{L}$  were transferred to 1.5  
8 mL microcentrifuge tubes and spun down at 20,000 rcf for 20 minutes to remove precipitated  
9 protein. 80  $\mu\text{L}$  of the supernatant was used for the following steps. 1  $\mu\text{g}$  per 20  $\mu\text{L}$  of sample of  
10 CAH and 1  $\mu\text{g}$  per 20  $\mu\text{L}$  of sample of BH was added to each sample. The samples were  
11 incubated at 25°C for 2 hours to allow for the complete conversion of the cyanuric acid to  
12 ammonia by CAH and BH. The Berthelot assay was performed in triplicate on the resulting  
13 samples to determine the production of ammonia. For every mole of cyanuric acid produced, one  
14 mole of ammonia was assumed to have been produced. 20  $\mu\text{L}$  of each sample was added to a  
15 96-well plate (Greiner half area clear #675101). 60  $\mu\text{L}$  of solution A (0.05 g/L sodium  
16 nitroprusside and 10g/L phenol) was added and mixed into every sample. Then 80  $\mu\text{L}$  of solution  
17 B (5 g/L NaOH and 8.4 mL/L bleach) was added and mixed into every sample. The samples  
18 were incubated for 30 minutes at 25°C for a blue color to develop. The absorbance at 630 nm  
19 was read using Tecan Infinite M200 Pro plate reader. The extinction coefficient was determined  
20 using standards of cyanuric acid at known concentrations in the enzyme activity buffer that had  
21 been reacted with the BH and CAH for 2 hours.

22  
23 **(SI 4.2) Temperature stress activity assays** – Assembled and unassembled enzyme samples  
24 were made as described above and incubated at 25°C for 4 hours to allow full assembly  
25 formation. The assemblies were then incubated at the following temperatures: 25°C, 40°C, 45°C,  
26 50°C, 55°C, and 60°C for fifteen minutes, and cooled back to 25°C before the addition of 400  
27  $\mu\text{M}$  atrazine. After atrazine was added, the enzyme activity assay was performed as described  
28 above.

29  
30 **(SI 4.3) Shaking stress activity assay** – Assembled and unassembled enzyme samples were  
31 made as described above and incubated at 25°C 4 hours. Both samples were shaken at 50, 100,  
32 150, 200, 225, and 250 RPM 25°C for 1 hour before any addition of atrazine. 400  $\mu\text{M}$  atrazine  
33 was added to the samples and shaking continued at their respective shaking speeds for 1.5 hour.  
34 The rest of the activity assay protocol was conducted the same as described above.

35  
36 **(SI 4.4) Construction and assay of Basotect® polymer foam with trapped assemblies and**  
37 **free enzymes** – Hydrolyzed TEOS was prepared by combining 7 ml TEOS (Aldrich #131903), 3  
38 ml water, and 0.04 ml 0.1N hydrochloric acid and stirring the solution for 2 h at room  
39 temperature<sup>†</sup>. Basotect® polymer foam (Procter and Gamble UPC# 0 37000 43515 0) was cut  
40 into 2.0 x 2.0 x 0.3 cm squares with a razor and 0.250 ml of assemblies or free enzyme solution  
41 was spotted onto each 2 x 2 cm face of the foam squares. Aliquots (1.0 or 0.5 ml) of hydrolyzed  
42 TEOS were diluted with HNG buffer to a final volume of 10 ml (10% or 5% TEOS). A single

1 application of 5% or 10% hydrolyzed TEOS solutions was done with a small paint brush  
2 (Richeson 95822). The TEOS was allowed to set for 2 h, and then liquid was squeezed out of  
3 each foam square and total protein concentration in the liquid was measured with the Bradford  
4 assay (BioRad #500-0006). To assay activity in the embedded foam, 1 ml of 150  $\mu$ M atrazine in  
5 1X phosphate buffered saline (pH 7.4) was soaked into the foam squares and incubated for 1.5  
6 hour at 25°C. Liquid was squeezed out after incubation and boiled as above to inactivate eluted  
7 enzymes. Cyanuric acid produced during the incubation was assayed as described except that the  
8 Berthelot reactions were conducted in 10 x 4 x 45 mm cuvettes (Sarstedt #67-742) and read  
9 using a Beckman DU 640 spectrophotometer.

10

## 11 **Supplementary Discussion**

### 12 **Fractal dimension from image analysis**

13 The fractal (Hausdorff-Besicovitch) dimension<sup>25</sup>, a concept introduced in 1918 to measure the  
14 dimensions and local size of a shape, has been used to characterize simulated fractal patterns<sup>26,27</sup> as  
15 well as peptide-based fractals obtained on a surface and imaged with AFM<sup>28</sup>. The Hausdorff-  
16 Besicovitch dimension equation, defined by the divider formula

17

$$35 \quad D_f = \lim_{r \rightarrow 0} \left( \frac{\log N(r)}{\log(r)} \right)$$

36

18 simply compares the length of a uniform line segment ( $r$ ), used to outline an image, to the size  
19 of the shape created by the line segments,  $N(r)$  across scaled values of  $r$ . With the development  
20 of imaging technology, image analysis tools have been implemented to determine the fractal  
21 dimension with greater accuracy<sup>29-33</sup> as well as measure the lacunarity<sup>29</sup> — a measure of the  
22 ‘openness’ a particular shape has. In place of line segments, image analysis tools (e.g., ImageJ)  
23 place uniform boxes on the image and compare the number of boxes total,  $\log(N)$ , to boxes that  
24 contain pixels,  $\log(L/L_0)$ , across scaled box size values, where  $L$  is the size of the box at each  
25 iteration and  $L_0$  is the size of the largest box size in the image. The slope of this relationship gives  
26 an accurate measure of the dimensionality of the imaged object,  $D_f$ .

27

28 For comparing HIM (main text Figure 3) or TEM (Fig. S22) images to our simulated fractal  
29 assemblies, we derived the fractal dimension (slope) and scalability (linear range) from 2D  
30 image analysis using ImageJ. When comparing the Cryo-ET data to the computational  
31 simulation results, projections were made to be analyzed with the same 2D image analysis.  
32 Additionally, 3D-fractal dimension analysis was performed with an in-house 3D box-counting  
33 algorithm that works in the same way that 2D image analysis does except the two-dimensional  
34 boxes are replaced with three-dimensional cubes (voxels) during the scaling analysis.

### 37 **Comparison of control (GS-rich-linker containing) and designed assembly topologies**

38 Although we could differentiate the density of the fractal assemblies at all scales from  $\mu$ m to nm

1 scale (Fig. S22A and Fig. S22C, respectively), the globular (GS-rich-linker containing)  
2 assemblies varied too greatly in structure topology across samples for meaningful analysis—the  
3 majority of these images were dominated by dark shadowy particles too dense to obtain  
4 meaningful assignments of density to individual protein components (Fig. S22B). However, a  
5 few images (<10%) from the GS-linker rich set had small resolvable nm-scale regions where  
6 density could be interpreted and assigned to individual protein components (Fig. S22D). For  
7 these images, we compared the average monomer-monomer distance across 5 control (GS-rich)  
8 and 5 fractal-shaped assemblies (Fig. S31) on the nm-scale. In the fractal-shaped assemblies the  
9 inter-monomer distance is tightly clustered ( $134 \pm 2 \text{ \AA}$ ) among images of large (>25 nm size)  
10 assemblies (~40% of the set), suggesting uniformity of inter-component connections in  
11 agreement with the design conception. In contrast, in the resolvable parts of the control assembly  
12 tomograms (<10% of the entire imaged sample), we see three different types of structures:  
13 dispersed assembly (inter-monomer distance  $\sim 157 \text{ \AA}$ ), fractal-similar assemblies ( $\sim 134 \text{ \AA}$ ), and  
14 densely packed globular ball-like structures ( $\sim 125 \text{ \AA}$ ). The robust catalytic activity of the control  
15 assembly (Fig. S30) demonstrates that the observed topologies in the control tomograms are not  
16 the result of protein unfolding but are in fact, mediated by the engineered SH2 domain-pY  
17 peptide interactions.

18  
19 We note that in our analyses, our fractals formed by the same components can vary in shape and  
20 dimension from island to island on surfaces as well as in solution. However, despite inter-island  
21 variations, every island or fractal in solution is self-similar (with the same fractal dimension)  
22 from a few protein connections to micron-sized particle scales. Similar topological diversity was  
23 also found in studies of silk protein sericin<sup>33</sup>, where variation in fractal dimension of observed  
24 protein islands was detected depending on the surface conditions but each island was self-  
25 similar.

26

## 27 **Supplementary Information References**

- 28 1. Dantas, G., Kuhlman, B., Callender, D., Wong, M. & Baker, D. A large scale test of  
29 computational protein design: Folding and stability of nine completely redesigned  
30 globular proteins. *J. Mol. Biol.* 332, 449–460 (2003).
- 31 2. Tinberg, C. E. et al. Computational design of ligand-binding proteins with high affinity  
32 and selectivity. *Nature* 501, 212–6 (2013).
- 33 3. Meiler, J. & Baker, D. ROSETTALIGAND: Protein-small molecule docking with full  
34 side-chain flexibility. *Proteins Struct. Funct. Genet.* 65, 538–548 (2006).
- 35 4. Tyka, M. D. et al. Alternate states of proteins revealed by detailed energy landscape  
36 mapping. *J. Mol. Biol.* 405, 607–618 (2011).
- 37 5. Zanghellini, A. et al. New algorithms and an in silico benchmark for computational  
38 enzyme design. *Protein Sci.* 15, 2785–2794 (2006).



- 1 6. Berman, H. M. et al. The protein data bank. *Nucleic Acids Res.* 28, 235–242 (2000).
- 2 7. Mandell, D. J. & Kortemme, T. Backbone flexibility in computational protein design.  
3 *Current Opinion in Biotechnology* 20, 420–428 (2009).
- 4 8. Fleishman, S. J. et al. Rosettascripts: A scripting language interface to the Rosetta  
5 *Macromolecular modeling suite*. *PLoS One* 6, (2011).
- 6 9. Karperien, A. *FracLac for ImageJ. User's Guide for FracLac, V. 2.5* (2013).  
7 doi:10.13140/2.1.4775.8402
- 8 10. Abràmoff, M. D., Magalhães, P. J. & Ram, S. J. Image processing with imageJ.  
9 *Biophotonics International* 11, 36–41 (2004).
- 10 11. Mandelbaum, R. T., Allan, D. I. & Wackett, L. P. Isolation and Characterization of a  
11 *Pseudomonas* sp. That Mineralizes the s-Triazine Herbicide Atrazine. *Appl. Environ.*  
12 *Microbiol.* 61, 1451–1457 (1995).
- 13 12. Seffernick, J. L., Johnson, G., Sadowsky, M. J. & Wackett, L. P. Substrate specificity of  
14 atrazine chlorohydrolase and atrazine-catabolizing bacteria. *Appl. Environ. Microbiol.* 66,  
15 4247–4252 (2000).
- 16 13. Seffernick, J. L. et al. Hydroxyatrazine N-ethylaminohydrolase (AtzB): An  
17 amidohydrolase superfamily enzyme catalyzing deamination and dechlorination. *J.*  
18 *Bacteriol.* 189, 6989–6997 (2007).
- 19 14. Shapir, N., Osborne, J. P., Johnson, G., Sadowsky, M. J. & Wackett, L. P. Purification,  
20 substrate range, and metal center of AtzC: The N-isopropylammelide aminohydrolase  
21 involved in bacterial atrazine metabolism. *J. Bacteriol.* 184, 5376–5384 (2002).
- 22 15. Gibson, D. G. et al. Enzymatic assembly of DNA molecules up to several hundred  
23 kilobases. *Nat. Methods* 6, 343–5 (2009).
- 24 16. Kaneko, T. et al. Superbinder SH2 Domains Act as Antagonists of Cell Signaling. *Sci.*  
25 *Signal.* 5, ra68-ra68 (2012).
- 26 17. Shapir, N. et al. TrzN from *Arthrobacter aurescens* TC1 is a zinc amidohydrolase. *J.*  
27 *Bacteriol.* 188, 5859–5864 (2006).
- 28 18. Parton, D. L. et al. An open library of human kinase domain constructs for automated  
29 bacterial expression. *bioRxiv* (2016).
- 30 19. Cameron, S. M., Durchschein, K., Richman, J. E., Sadowsky, M. J. & Wackett, L. P. New  
31 family of biuret hydrolases involved in s-triazine ring metabolism. *ACS Catal.* 1, 1075–  
32 1082 (2011).
- 33 20. Li, Q., Seffernick, J. L., Sadowsky, M. J. & Wackett, L. P. Thermostable cyanuric acid  
34 hydrolase from *Moorella thermoacetica* ATCC 39073. *Appl. Environ. Microbiol.* 75,  
35 6986–6991 (2009).
- 36 21. Nečas, D. & Klapetek, P. Gwyddion: an open-source software for SPM data analysis.  
37 *Open Phys.* 10, 181–188 (2012).

- 1 22. Kremer, J. R., Mastrorarde, D. N. & McIntosh, J. R. Computer visualization of three-  
2 dimensional image data using IMOD. *J. Struct. Biol.* 116, 71–6 (1996).
- 3 23. Pettersen, E. F. et al. UCSF Chimera - A visualization system for exploratory research and  
4 analysis. *J. Comput. Chem.* 25, 1605–1612 (2004).
- 5 24. Mutlu, B. R., Yeom, S., Wackett, L. P. & Aksan, A. Modelling and optimization of a  
6 bioremediation system utilizing silica gel encapsulated whole-cell biocatalyst. *Chem. Eng.*  
7 *J.* 259, 574–580 (2015).
- 8 25. Hausdorff, F. Dimension und äußeres Maß. *Math. Ann.* 79, 157–179 (1919).
- 9 26. Meakin, P. Formation of fractal clusters and networks by irreversible diffusion-limited  
10 aggregation. *Phys. Rev. Lett.* 51, 1119–1122 (1983).
- 11 27. Meakin, P. Diffusion-controlled cluster formation in 2-6 dimensional space. *Phys. Rev. A*  
12 27, 1495–1507 (1983).
- 13 28. Lomander, A., Hwang, W. & Zhang, S. Hierarchical self-assembly of a coiled-coil peptide  
14 into fractal structure. *Nano Lett.* 5, 1255–1260 (2005).
- 15 29. Kirkby, M. J. *The fractal geometry of nature*. Benoit B. Mandelbrot. W. H. Freeman and  
16 co., San Francisco, 1982. No. of pages: 460. Price: £22.75 (hardback). *Earth Surf. Process.*  
17 *Landforms* 8, 406–406 (1983).
- 18 30. Smith, T. G., Lange, G. D. & Marks, W. B. Fractal methods and results in cellular  
19 morphology - Dimensions, lacunarity and multifractals. *Journal of Neuroscience Methods*  
20 69, 123–136 (1996).
- 21 31. Fairbanks, M. S., McCarthy, D. N., Scott, S. A., Brown, S. A. & Taylor, R. P. Fractal  
22 electronic devices: Simulation and implementation. *Nanotechnology* 22, (2011).
- 23 32. Murr, M. M. & Morse, D. E. Fractal intermediates in the self-assembly of silicatein  
24 filaments. *Proc. Natl. Acad. Sci.* 102, 11657–11662 (2005).
- 25 33. Khire, T. S., Kundu, J., Kundu, S. C. & Yadavalli, V. K. The fractal self-assembly of the  
26 silk protein sericin. *Soft Matter* 6, 2066 (2010).

27

28

29

30

31

32

33

34

- 1
- 2
- 3
- 4
- 5
- 6
- 7
- 8
- 9
- 10
- 11
- 12
- 13

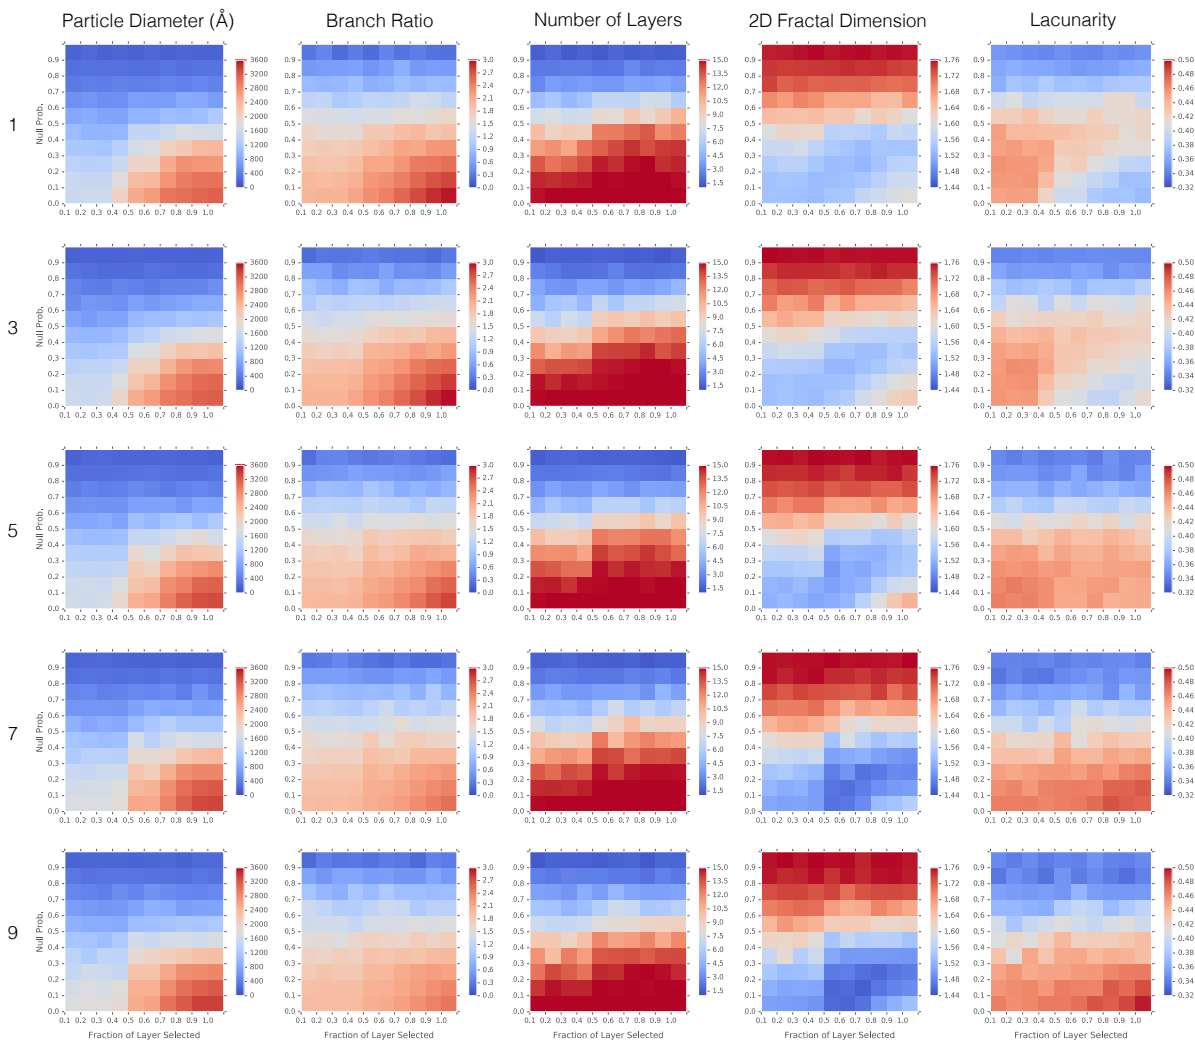

1  
2 **Fig. S1.** Computational parameter sweep of  $kT$  (major y-axis),  $P_{\text{null}}$  (minor y-axis), and  $C_{\text{fin}}$  (minor x-axis). The various fractal  
3 topologies (limited to 15 layers) were evaluated by their particle diameter, branch ratio, layer count, 2D fractal dimension ( $D_i$ ),  
4 and Lacunarity. We observe size, shape, and composition trends with varying  $P_{\text{null}}$  and  $C_{\text{fin}}$ . Less obvious trends in topology via  
5 lacunarity and  $D_i$  are also observed with changing  $kT$ .  $P_{\text{null}}$  values above 0.4 (0.5-0.9) and  $C_{\text{fin}}$  values below 0.5 (0.0-0.4) show a  
6 steep decline in particle size and number of total layers on average—terminating growth during simulation (unlike experimental  
7 data). For non-terminating values of  $P_{\text{null}}$  (0.0-0.4) and  $C_{\text{fin}}$  (0.5-1.0),  $D_i$  is high ( $\sim 1.7$ ) when the connection probability is high—  
8 more isotropic fractal—and low ( $\sim 1.6$ ) when the connection probability is low—more anisotropic fractal shapes. When the  $kT$   
9 increases we notice that the relative difference between high and low connection probability is maintained, however, the overall  
10  $D_i$  decreases ( $\sim 1.6$  and  $\sim 1.5$ ) respectively. This can be attributed to the flatter probability landscape allowing for more  $180^\circ$   
11 bound-angle (mixed vertex and edge centered connections around AtzA)—linearizing the branch connections on average and  
12 subsequently decreasing the fractal dimension.

13

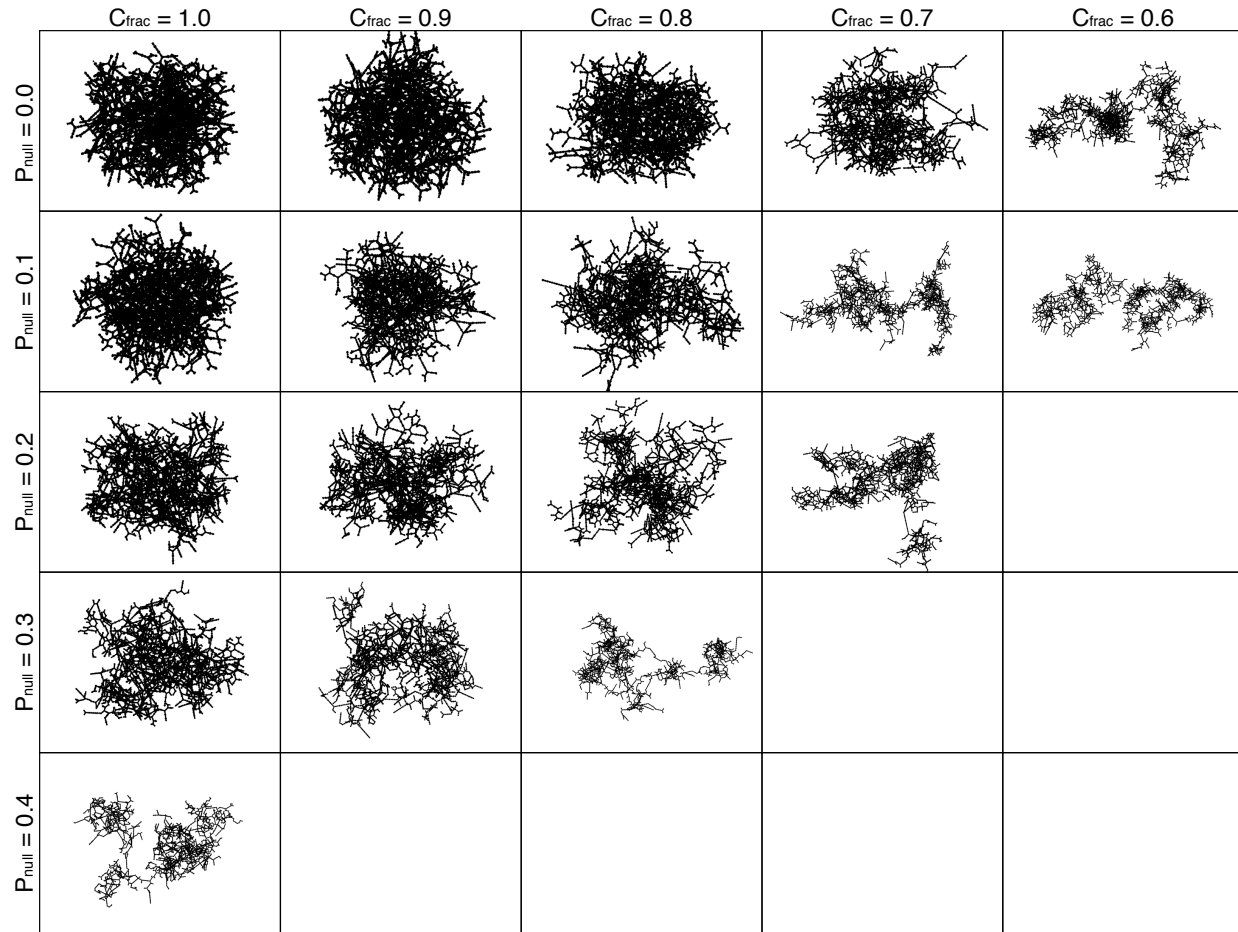

1

2 **Fig. S2.** Representative simulated fractal images (approx. 5000 components each and  $kT = 9$ ) that possess the average layer count  
3 and branch ratio for varying values of  $P_{\text{null}}$  (y-axis) and  $C_{\text{frac}}$  (x-axis) of 100 models. We observe qualitatively, the number of  
4 layers and branch ratio decreases on average as the connection probability decreases. These results are qualitatively similar to  
5 varying concentrations of [pY-AtzA] in Figure 3E.

6

7

8

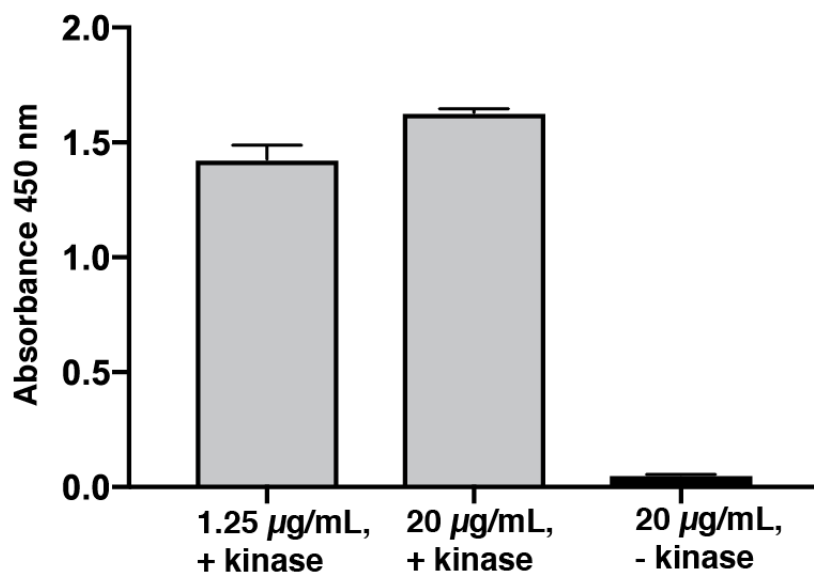

1

2 **Fig. S3. Phosphorylation of SH2 peptide AtzA fusion (pY-AtzA) by Src kinase.**

3 In order to verify phosphorylation of AtzA by Src kinase into phosphorylated SH2 peptide AtzA fusion (pY-AtzA), ELISA with  
4 (1:4000 dilution) antiphosphotyrosine-horseradish peroxidase conjugate was performed on pY-AtzA samples either with Src  
5 kinase (+) or without Src kinase (-), in phosphorylation reaction buffer at 1.25 µg/mL pY-AtzA or 20 µg/mL pY-AtzA. Data is  
6 presented as mean ± 1 standard deviation.

7

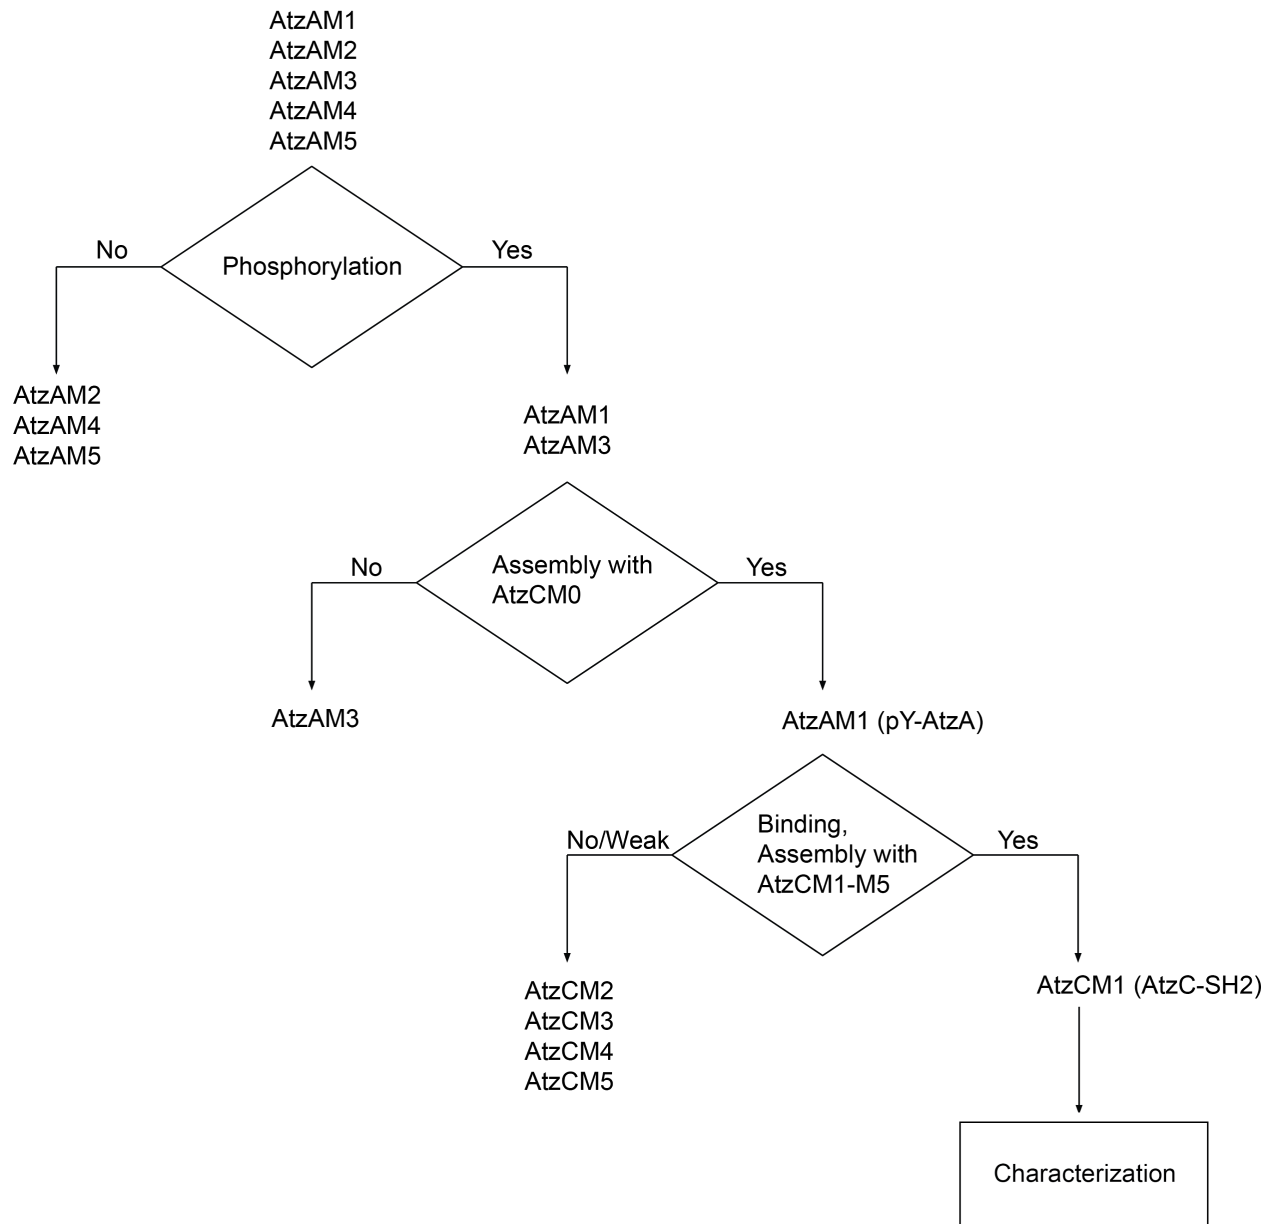

1  
2  
3  
4  
5  
6  
7  
8  
9  
10  
11

**Fig. S4. Experimental selection process for pY-AtzA and AtzC-SH2.** Five N-terminal SH2 binding peptide AtzA fusions (AtzAM1-AtzAM5) and five C-terminal SH2 binding domain AtzC fusions (AtzCM1-AtzCM5) were selected, cloned, expressed, and purified. AtzAM1-M5 were screened for having the ability to be phosphorylated via ELISA with anti-phosphotyrosine. Only two AtzA designs, AtzAM1 and AtzAM3, showed strong phosphorylation. The ability for assembly formation to occur with a direct C-terminal SH2 binding domain AtzC fusion (no mutations; AtzCM0) was used to select the best AtzA design. AtzAM1 was chosen for superior assembly formation ability, becoming pY-AtzA. The five AtzC designs AtzCM1-AtzCM5 were screened for the ability to effectively bind and assemble with pY-AtzA. The combination of pY-AtzA and AtzCM1 (which we call AtzC-SH2) showed the strongest binding and the most robust assembly formation. This pair was then chosen for further characterization.

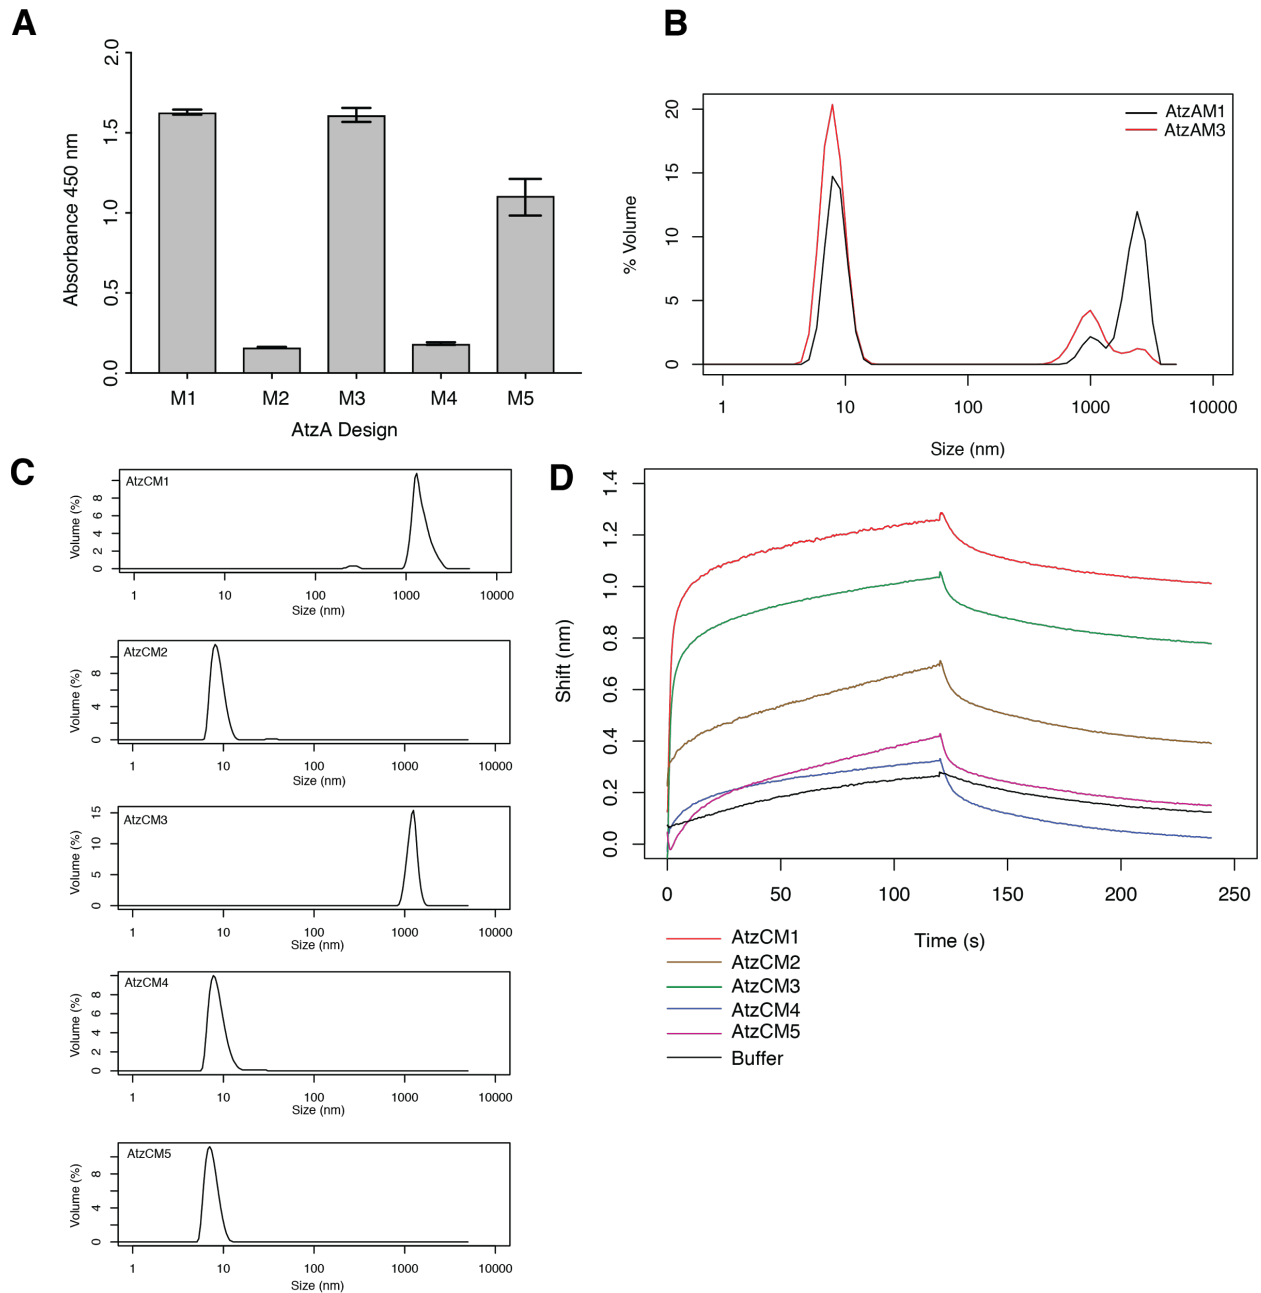

1  
2  
3  
4  
5  
6  
7  
8

**Fig. S5. Experimental selection of AtzA, AtzC subunits for characterization.** (A) ELISA screening of AtzA designs. (B) DLS size distribution of AtzA designs with AtzCM0. (C) DLS size distribution of AtzC-SH2 designs with pY-AtzA. Samples prepared at 3  $\mu$ M pY-AtzA, 2  $\mu$ M AtzC-SH2 design. Only AtzCM1 and AtzCM3 showed assembly formation with pY-AtzA. Volume distribution reported. (D) BLI binding traces of AtzC-SH2 designs with pY-AtzA. AtzC-SH2 designs were screened for binding with BLI, using pY-AtzA as the load. Out of all AtzC-SH2 designs prepared, AtzCM1 had the highest binding affinity to pY-AtzA. Based on the assembly formation and binding data, AtzCM1 was chosen for further investigation.



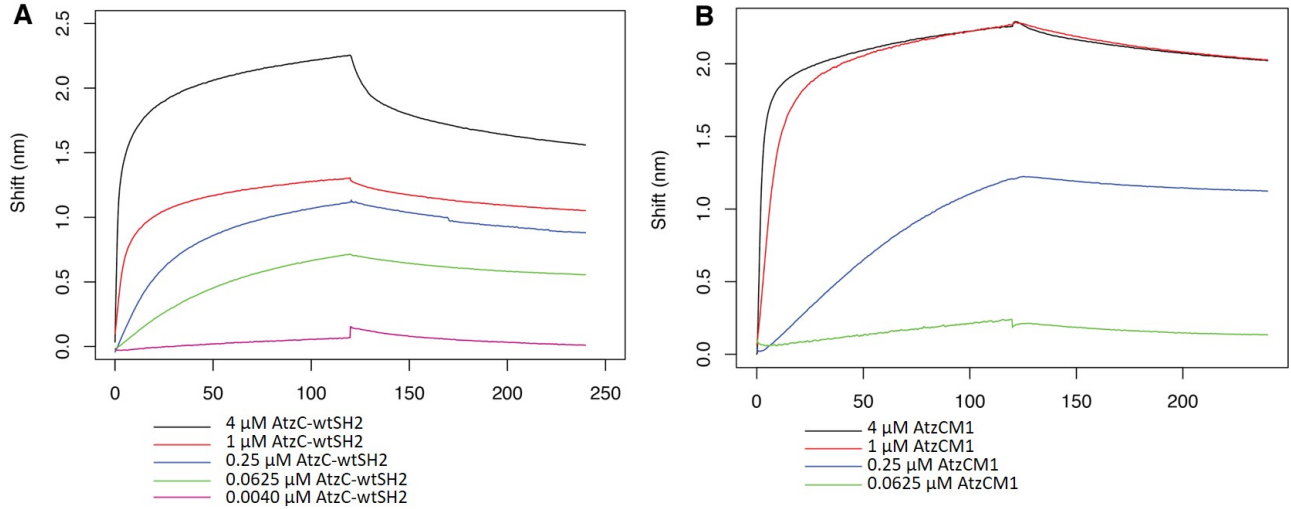

1

2 **Fig. S6. Biolayer interferometry (BLI) binding profiles of AtzC wildtype SH2 fusion (AtzC-wtSH2) and AtzC superbinder**  
 3 **SH2 fusion (AtzC-SH2) to phosphorylated SH2 binding peptide AtzA fusion (pY-AtzA).** (A) Binding profile of AtzC-wtSH2  
 4 to pY-AtzA. PY-AtzA was loaded onto the biosensor via a streptavidin-biotin interaction. AtzC-wtSH2 was flowed into the  
 5 sample.  $K_D = 41.79 \pm 0.32$  nM. (B) Binding profile of AtzCM1 (superbinder) to pY-AtzA. PY-AtzA was loaded onto the  
 6 biosensor via a streptavidin-biotin interaction. AtzC-SH2 was flowed into the sample.  $K_D = 7.67 \pm 0.52$  nM.

7

8

9

10

11

12

13

14

15

16

17

18

19

20

21

22

```

AtzCM0 MSKDFDLIIRNAYLSEKDSVYDIGIVGDRIIKIEAKIEGTVKDEIDAKGNLVSPGFVDAH 60
AtzCM1 MSKDFDLIIRNAYLSEKDSVYDIGIVGDRIIKIEAKIEGTVKDEIDAKGNLVSPGFVDAH 60
AtzCM2 MSKDFDLIIRNAYLSEKDSVYDIGIVGDRIIKIEAKIEGTVKDEIDAKGNLVSPGFVDAH 60
AtzCM3 MSKDFDLIIRNAYLSEKDSVYDIGIVGDRIIKIEAKIEGTVGDEIDAKGNLVSPGFVDAH 60
AtzCM4 MSKDFDLIIRNAYLSEKDSVYDIGIVGDRIIKIEAKIEGTVKDEIDAKGNLVSPGFVDAH 60
AtzCM5 MSKDFDLIIRNAYLSEKDSVYDIGIVGDRIIKIEAKIEGTVKDEIDAKGNLVSPGFVDAH 60

AtzCM0 THMDKSFTSTGERLPKFWSRPYTRDAAIEDGLKYYKNATHEEIKRHVIEHAHMQVLHGTL 120
AtzCM1 THMDKSFTSTGERLPKFWSRPYTRDAAIEDGLKYYKNATHEEIKRHVIEHAHMQVLHGTL 120
AtzCM2 THMDKSFTSTGERLPKFWSRPYTRDAAIEDGLKYYKNATHEEIKRHVIEHAHMQVLHGTL 120
AtzCM3 THMDKSFTSTGERLPKFWSRPYTRDAAIEDGLKYYKNATHEEIKRHVIEHAHMQVLHGTL 120
AtzCM4 THMDKSFTSTGERLPKFWSRPYTRDAAIEDGLKYYKNATHEEIKRHVIEHAHMQVLHGTL 120
AtzCM5 THMDKSFTSTGERLPKFWSRPYTRDAAIEDGLKYYKNATHEEIKRHVIEHAHMQVLHGTL 120

AtzCM0 YTRTHVDVDSVAKTKAVEAVLEAKEELKDLIDIQVVAFAQSGFFVDLESESLIRKSLDMG 180
AtzCM1 YTRTHVDVDSVAKTKAVEAVLEAKEELKDLIDIQVVAFAQSGFFVDLESESLIRKSLDMG 180
AtzCM2 YTRTHVDVDSVAKTKAVEAVLEAKEELKDLIDIQVVAFAQSGFFVDLESESLIRKSLDMG 180
AtzCM3 YTRTHVDVDSVAKTKAVEAVLEAKEELKDSIDIQVVAFAQSGFFVDLESESLIRKSLDMG 180
AtzCM4 YTRTHVDVDSVAKTKAVEAVLEAKEELKDLIDIQVVAFAQSGFFVDLESESLIRKSLDMG 180
AtzCM5 YTRTHVDVDSVAKTKAVEAVLEAKEELKDLIDIQVVAFAQSGFFVDLESESLIRKSLDMG 180

AtzCM0 CDLVGGVDPATRENNVEGSLDLCFKLAKEYDVIDIDYHIHDIGTVGVYSINRLAQTIENTG 240
AtzCM1 CDLVGGVDPATRENNVEGSLDLCFKLAKEYDVIDIDYHIHDIGTVGVYSINRLAQTIENTG 240
AtzCM2 CDLVGGVDPATRENNVEGSLDLCFKLAKEYDVIDIDYHIHDIGTVGVYSINRLAQTIENTG 240
AtzCM3 CDLVGGVDPATRENNVEGSLDLCFKLAKEYDVIDIDYHIHDIGTVGVYSINRLAQTIENTG 240
AtzCM4 CDLVGGVDPATRENNVEGSLDLCFKLAKEYDVIDIDYHIHDIGTVGVYSINRLAQTIENTG 240
AtzCM5 CDLVGGVDPATRENNVEGSLDLCFKLAKEYDVIDIDYHIHDIGTVGVYSINRLAQTIENTG 240

AtzCM0 YKGRVTTSHAWCFADAPSEWLDEAIPLYKDSGMKFVTCFSSTPPTMPVIKLEAGINLGC 300
AtzCM1 YKGRVTTSHAWCFADAPSEWLDEAIPLYKDSGMKFVTCFSSTPPTMPVIKLEAGINLGC 300
AtzCM2 YKGRVTTSHAWCFADAPSEWLDEAIPLYKDSGMKFVTCFSSTPPTMPVIKLEAGINLGC 300
AtzCM3 YKGRVTTSHAWCFADAPSEWLDEAIPLYKDSGMKFVTCFSSTPPTMPVIKLEAGINLGC 300
AtzCM4 YKGRVTTSHAWCFADAPSEWLDEAIPLYKDSGMKFVTCFSSTPPTMPVIKLEAGINLGC 300
AtzCM5 YKGRVTTSHAWCFADAPSEWLDEAIPLYKDSGMKFVTCFSSTPPTMPVIKLEAGINLGC 300

AtzCM0 ASDNIRDFWVPPFGNGDMVQGALIIETQRLELKTNRDLGLIWKMITSEGARVLGIEKNYGIE 360
AtzCM1 ASDNIRDFWVPPFGNGDMVQGALIIETQRLELKTNRDLGLIWKMITSEGARVLGIEKNYGIE 360
AtzCM2 ASDNIRDFWVPPFGNGDMVQGALIIETQRLELKTNRDLGLIWKMITSEGARVLGIEKNYGIE 360
AtzCM3 ASDNIRDFWVPPFGNGDMVQGALIIETQRLELKTNRDLGLIWKMITSEGARVLGIEKNYGIE 360
AtzCM4 ASDNIRDFWVPPFGNGDMVQGALIIETQRLELKTNRDLGLIWKMITSEGARVLGIEKNYGIE 360
AtzCM5 ASDNIRDFWVPPFGNGDMVQGALIIETQRLELKTNRDLGLIWKMITSEGARVLGIEKNYGIE 360

AtzCM0 VGKKADLVVLNSLS PQWAIIDQAKRLCVIKNGRIIVKDEVIVASIQAE EWYFGKLGRKDA 420
AtzCM1 VGKKADLVVLNSLS PQWAIIDQAKRLCVIKNGRIIVKDEVIVAGGS AE EWYFGKLGRKDA 420
AtzCM2 VGKKADLVVLNSLS PQWAIIDQAKRLCVIKNGRIIVKDEVIVAGVA AE EWYFGKLGRKDA 420
AtzCM3 VGKKADLVVLNSLS PQWAIIDQAKRLCVIKNGRIIVKDEVIIASG AE EWYFGKLGRKDA 420
AtzCM4 VGKKADLVVLNSLS PQWAIIDQAKRLCVIKNGAIIVKDEVIIAGGS AE EWYFGKLGRKDA 420
AtzCM5 VGKKADLVVLNSLS PQWAIIDQAKRLCVIKNGSICVKDEAIIASGS AE EWYFGKLGRKDA 420

```

1  
2  
3

Fig. S7a. Sequence alignment of AtzC-SH2 designs AtzCM0-AtzCM1.

|        |                                                               |     |
|--------|---------------------------------------------------------------|-----|
| AtzCM0 | ERQLLSFGNPRGTFLIRESETVKGAYALSIRDWDDMKGDHVKHYLIRKLDNGGGYYITTRA | 480 |
| AtzCM1 | ERQLLSFGNPRGTFLIRESETVKGAYALSIRDWDDMKGDHVKHYLIRKLDNGGGYYITTRA | 480 |
| AtzCM2 | ERQLLSFGNPRGTFLIRESETVKGAYALSIRDWDDMKGDHVKHYLIRKLDNGGGYYITTRA | 480 |
| AtzCM3 | ERQLLSFGNPRGTFLIRESETVKGAYALSIRDWDDMKGDHVKHYLIRKLDNGGGYYITTRA | 480 |
| AtzCM4 | ERQLLSFGNPRGTFLIRESETVKGAYALSIRDWDDMKGDHVKHYLIRKLDNGGGYYITTRA | 480 |
| AtzCM5 | ERQLLSFGNPRGTFLIRESETVKGAYALSIRDWDDMKGDHVKHYLIRKLDNGGGYYITTRA | 480 |
|        |                                                               |     |
| AtzCM0 | QFETLQQLVQHYSEARAAGLSSRLVVP SHKLEHHHHHH                       | 517 |
| AtzCM1 | QFETLQQLVQHYSEARAAGLSSRLVVP SHKLEHHHHHH                       | 517 |
| AtzCM2 | QFETLQQLVQHYSEARAAGLSSRLVVP SHKLEHHHHHH                       | 517 |
| AtzCM3 | QFETLQQLVQHYSEARAAGLSSRLVVP SHKLEHHHHHH                       | 517 |
| AtzCM4 | QFETLQQLVQHYSEARAAGLSSRLVVP SHKLEHHHHHH                       | 517 |
| AtzCM5 | QFETLQQLVQHYSEARAAGLSSRLVVP SHKLEHHHHHH                       | 517 |

**Fig. S7b. Sequence alignment of AtzC-SH2 designs AtzCM0-AtzCM1 (con't).**

Sequence alignment of AtzC-SH2 designs prepared. AtzCM0 is a direct fusion of AtzC and superbinder SH2 domain without mutations. Mutations made are highlighted in black or grey (similar residues). The red box highlights the region where the superbinder SH2 domain is located.

1  
2  
3  
4  
5  
6  
7  
8  
9  
10  
11  
12  
13  
14  
15  
16  
17  
18  
19  
20  
21  
22  
23  
24  
25

```

AtzAM3 MGSSHHHHHHSSGLVPRGSHMEPQYEEIPNYGGLSIQHGTLVTMDQYRRVLGDSWVHVQD 60
AtzAM4 MGSSHHHHHHSSGLVPRGSHMEPQYEEIPDYGGLSIQHGTLVTMDQYRRVLGDSWVHVQD 60
AtzAM2 MGSSHHHHHHSSGLVPRGSHMEPQYEEIPDYGTLSIQHGTLVTMDQYRRVLGDSWVHVQD 60
AtzAM5 MGSSHHHHHHSSGLVPRGSHMEPQYEEIPDYGTLSIQHGTLVTMDQYRRVLGDSWVHVQD 60
AtzAM1 MGSSHHHHHHSSGLVPRGSHMEPQYEEIPYQGTLSIQHGTLVTMDQYRRVLGDSWVHVQD 60

AtzAM3 GRIVALGVHAESVPPPADRVIDARGKVLPGFINAHTHVNQILLRGGPSHGRQFYDWLFN 120
AtzAM4 GRIVALGVHAESVPPPADRVIDARGKVLPGFINAHTHVNQILLRGGPSHGRQFYDWLFN 120
AtzAM2 GRIVALGVHAESVPPPADRVIDARGKVLPGFINAHTHVNQILLRGGPSHGRQFYDWLFN 120
AtzAM5 GRIVALGVHAESVPPPADRVIDARGKVLPGFINAHTHVNQILLRGGPSHGRQFYDWLFN 120
AtzAM1 GRIVALGVHASVPPPADRVIDARGKVLPGFINAHTHVNQILLRGGPSHGRQFYDWLFN 120

AtzAM3 VVYPGQKAMRPEDVAVAVRLYCAEAVRSGITTINENADSAIYPGNIEAAMAVYGEVGVRV 180
AtzAM4 VVYPGQKAMRPEDVAVAVRLYCAEAVRSGITTINENADSAIYPGNIEAAMAVYGEVGVRV 180
AtzAM2 VVYPGQKAMRPEDVAVAVRLYCAEAVRSGITTINENADSAIYPGNIEAAMAVYGEVGVRV 180
AtzAM5 VVYPGQKAMRPEDVAVAVRLYCAEAVRSGITTINENADSAIYPGNIEAAMAVYGEVGVRV 180
AtzAM1 VVYPGQKAMRPEDVAVAVRLYCAEAVRSGITTINENADSAIYPGNIEAAMAVYGEVGVRV 180

AtzAM3 VYARFFFDRMDGRIQGYVDALKARSPQVELCSIMEETAVAKDRITALSDQYHGTAGGRIS 240
AtzAM4 VYARFFFDRMDGRIQGYVDALKARSPQVELCSIMEETAVAKDRITALSDQYHGTAGGRIS 240
AtzAM2 VYARFFFDRMDGRIQGYVDALKARSPQVELCSIMEETAVAKDRITALSDQYHGTAGGRIS 240
AtzAM5 VYARFFFDRMDGRIQGYVDALKARSPQVELCSIMEETAVAKDRITALSDQYHGTAGGRIS 240
AtzAM1 VYARFFFDRMDGRIQGYVDALKARSPQVELCSIMEETAVAKDRITALSDQYHGTAGGRIS 240

AtzAM3 VWPAPATTTAVTVEGMRWAQAFARDRAVMWTLHMAESDHDERIHGMSPAEYMECYGLLDE 300
AtzAM4 VWPAPATTTAVTVEGMRWAQAFARDRAVMWTLHMAESDHDERIHGMSPAEYMECYGLLDE 300
AtzAM2 VWPAPATTTAVTVEGMRWAQAFARDRAVMWTLHMAESDHDERIHGMSPAEYMECYGLLDE 300
AtzAM5 VWPAPATTTAVTVEGMRWAQAFARDRAVMWTLHMAESDHDERIHGMSPAEYMECYGLLDE 300
AtzAM1 VWPAPATTTAVTVEGMRWAQAFARDRAVMWTLHMAESDHDERIHGMSPAEYMECYGLLDE 300

AtzAM3 RLQVAHCVFYFDRKDVRLLRHNVKVASQVVSNAYLGSVAPVPEMVERGMAVIGTDNGN 360
AtzAM4 RLQVAHCVFYFDRKDVRLLRHNVKVASQVVSNAYLGSVAPVPEMVERGMAVIGTDNGN 360
AtzAM2 RLQVAHCVFYFDRKDVRLLRHNVKVASQVVSNAYLGSVAPVPEMVERGMAVIGTDNGN 360
AtzAM5 RLQVAHCVFYFDRKDVRLLRHNVKVASQVVSNAYLGSVAPVPEMVERGMAVIGTDNGN 360
AtzAM1 RLQVAHCVFYFDRKDVRLLRHNVKVASQVVSNAYLGSVAPVPEMVERGMAVIGTDNGN 360

AtzAM3 SNDSVNMIGDMKFMAHIHRAVHRDADVLTPEKILEMATIDGARSLGMDHEIGSIETGKRA 420
AtzAM4 SNDSVNMIGDMKFMAHIHRAVHRDADVLTPEKILEMATIDGARSLGMDHEIGSIETGKRA 420
AtzAM2 SNDSVNMIGDMKFMAHIHRAVHRDADVLTPEKILEMATIDGARSLGMDHEIGSIETGKRA 420
AtzAM5 SNDSVNMIGDMKFMAHIHRAVHRDADVLTPEKILEMATIDGARSLGMDHEIGSIETGKRA 420
AtzAM1 SNDSVNMIGDMKFMAHIHRAVHRDADVLTPEKILEMATIDGARSLGMDHEIGSIETGKRA 420

AtzAM3 DLILLDLRHPQTTPHHHLAATIVFQAYGNEVDTVLIDGNVVMENRRLSFLPPERELAFLE 480
AtzAM4 DLILLDLRHPQTTPHHHLAATIVFQAYGNEVDTVLIDGNVVMENRRLSFLPPERELAFLE 480
AtzAM2 DLILLDLRHPQTTPHHHLAATIVFQAYGNEVDTVLIDGNVVMENRRLSFLPPERELAFLE 480
AtzAM5 DLILLDLRHPQTTPHHHLAATIVFQAYGNEVDTVLIDGNVVMENRRLSFLPPERELAFLE 480
AtzAM1 DLILLDLRHPQTTPHHHLAATIVFQAYGNEVDTVLIDGNVVMENRRLSFLPPERELAFLE 480

AtzAM3 EAQSRATAILQRANMVANPAWRSL 540
AtzAM4 EAQSRATAILQRANMVANPAWRSL 540
AtzAM2 EAQSRATAILQRANMVANPAWRSL 540
AtzAM5 EAQSRATAILQRANMVANPAWRSL 540
AtzAM1 EAQSRATAILQRANMVANPAWRSL 540

```

**Fig. S8. Sequence alignment of pY-AtzA designs.**

Sequence alignment of pY-AtzA designs prepared. AtzAM0 is a direct fusion of AtzA and SH2 binding peptide without mutations. Mutations made are shown in black.

1  
2  
3  
4  
5  
6  
7  
8

1

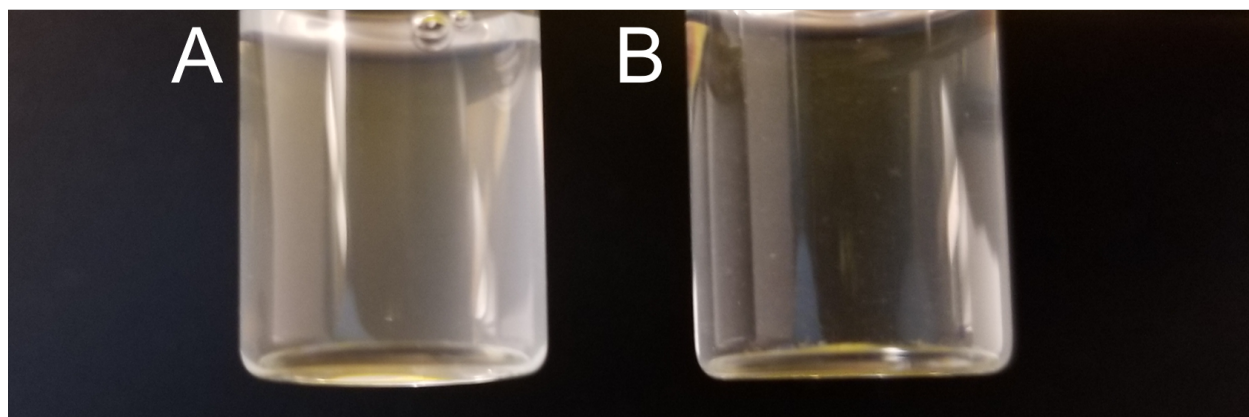

2

3 **Fig. S9.** (A) 3  $\mu$ M pY-AtzAM1 and 2  $\mu$ M AtzCM1, shows a turbid solution that represents the assembly formed. (B) 3  $\mu$ M non-  
4 pY-AtzAM1 and 2  $\mu$ M AtzCM1, shows a clear solution with no assembly formation.

5

6

7

8

9

10

11

12

13

14

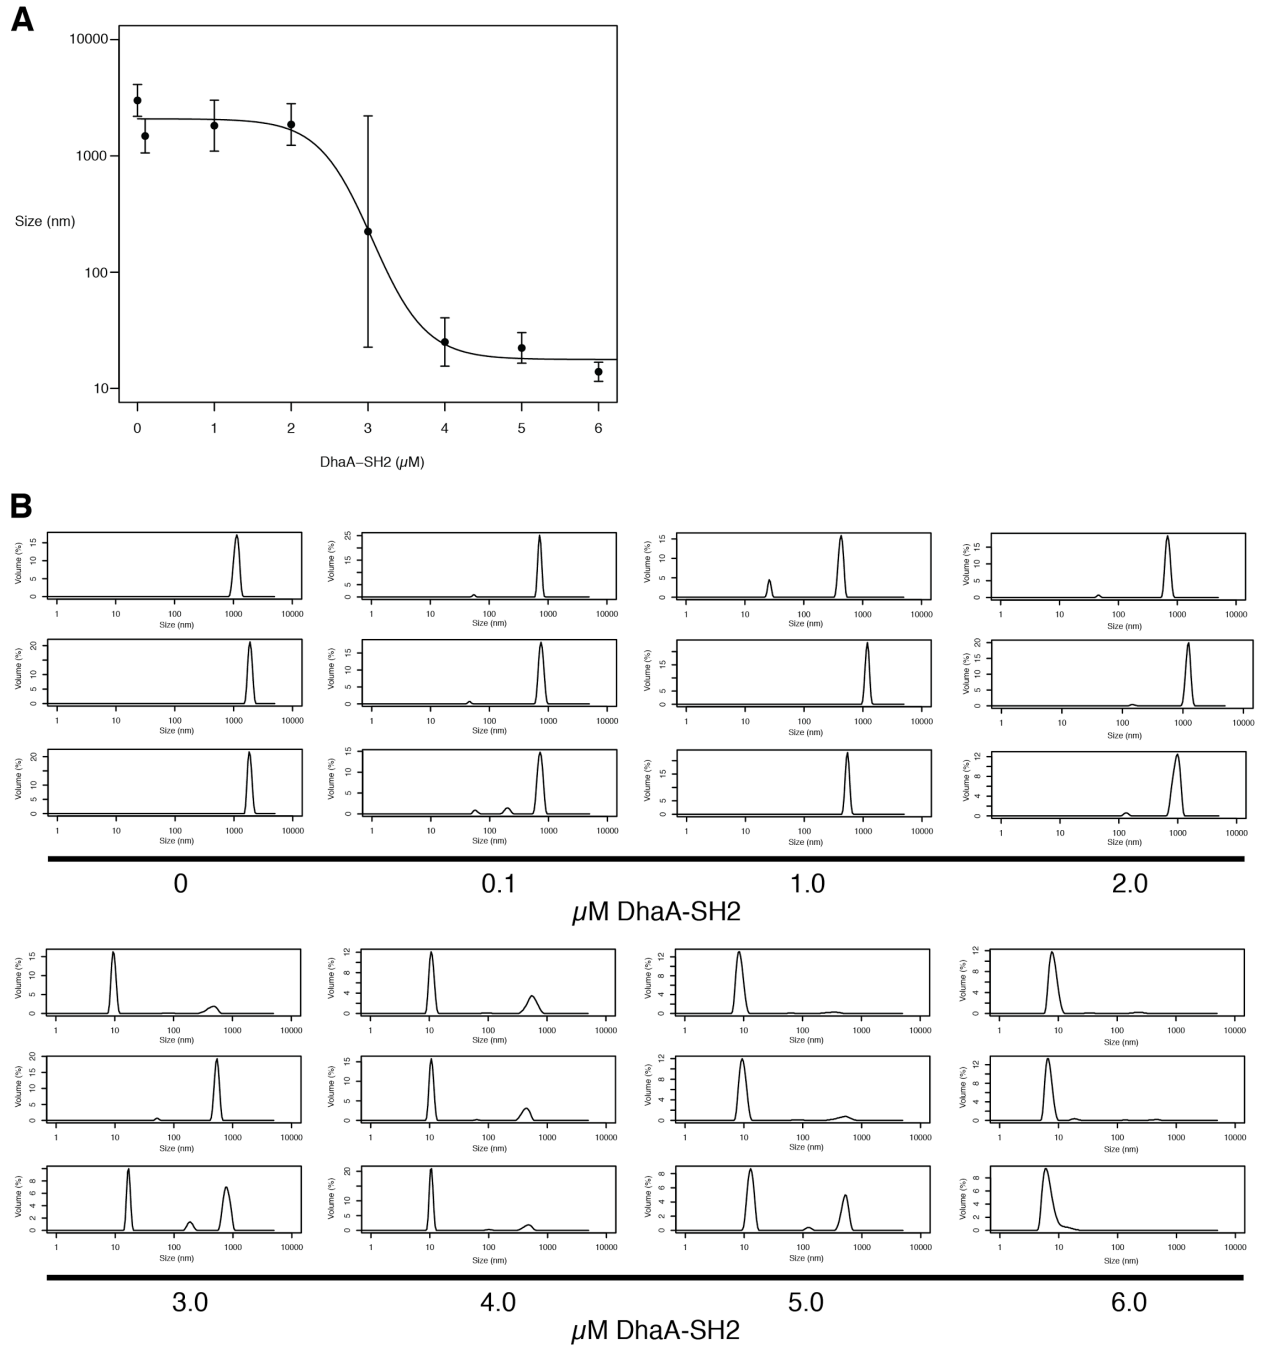

1  
2  
3  
4  
5  
6  
7  
8

**Fig. S10. Inhibition of assembly at 0.66  $\mu\text{M}$  AtzC-SH2, 1  $\mu\text{M}$  pY-AtzA, 0-6  $\mu\text{M}$  SH2-DhaA. (A) Inhibition graph of SH2-DhaA on 0.66  $\mu\text{M}$  AtzC-SH2, 1  $\mu\text{M}$  pY-AtzA assembly. Size recorded represents most predominant DLS sizing peak. Data are presented as mean  $\pm$  1 standard deviation. IC<sub>50</sub> = 3.05  $\mu\text{M}$ . Adjusted R<sup>2</sup> = 0.98. (B) DLS traces of assembly from 0 - 6  $\mu\text{M}$  SH2-DhaA. DLS traces are of triplicates.**







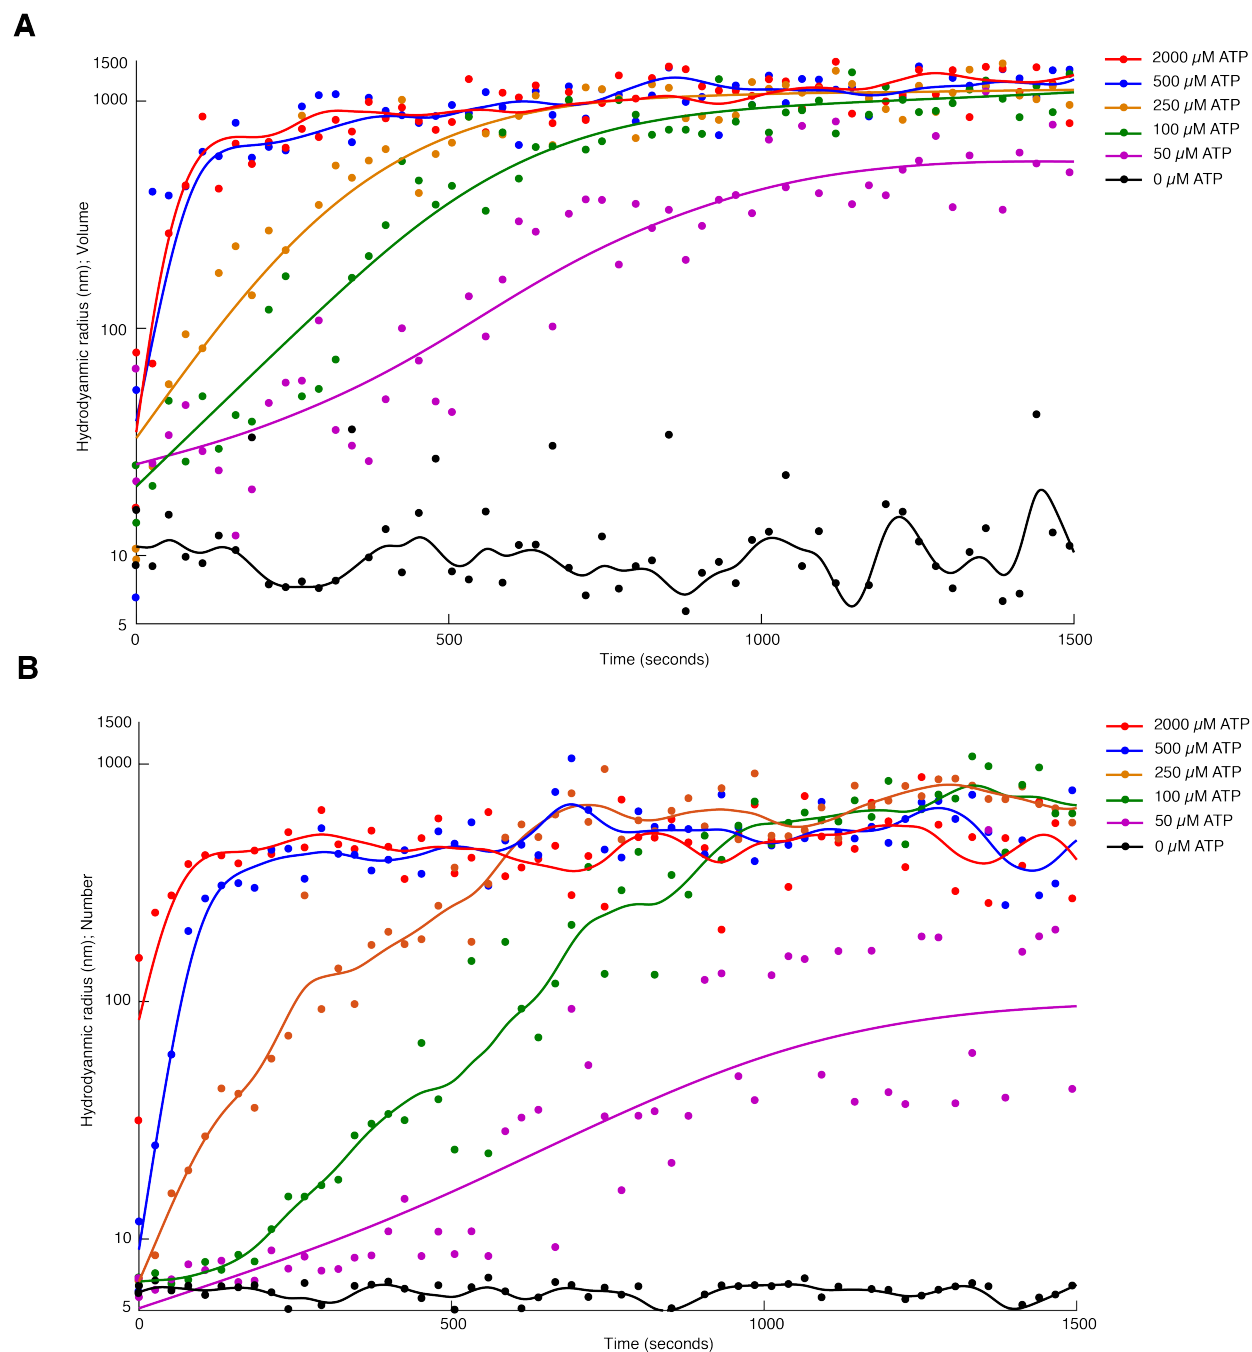

1  
2  
3  
4  
5  
6  
7  
8  
9

**Fig. S13. Rate of assembly formation is dependent on ATP concentration.** (A) Volume mean of sample from 0 – 1500 sec. Each point represents average of triplicates. (B) Number mean of sample from 0 – 1500 sec. Each point represents average of triplicates. Curve fitting performed using sloping spline with smoothness parameter (p) and adjusted  $R^2$  value given in table SX.

| Distribution | ATP $\mu$ M | Adjusted R-square | $p$         |
|--------------|-------------|-------------------|-------------|
| Vol          | 2000        | 0.7889            | 1.31E-05    |
| Vol          | 500         | 0.888             | 1.31E-05    |
| Vol          | 250         | 0.898             | 3.25E-08    |
| Vol          | 100         | 0.9374            | 3.25E-08    |
| Vol          | 50          | 0.867             | 3.25E-08    |
| Vol          | 0           | 0.2638            | 0.000182922 |
| Num          | 2000        | 0.5044            | 2.16E-05    |
| Num          | 500         | 0.9303            | 2.16E-05    |
| Num          | 250         | 0.9678            | 2.16E-05    |
| Num          | 100         | 0.9543            | 2.16E-05    |
| Num          | 50          | 0.7189            | 7.25E-09    |
| Num          | 0           | 0.3338            | 0.000110956 |

1

2

**Table S1. Curve fitting data for Figure S13.** Adjusted R and smoothing parameter ( $p$ ) value given for curve fitting done on assembly kinetics data.

3

4

5

6

7

8

9

10

11

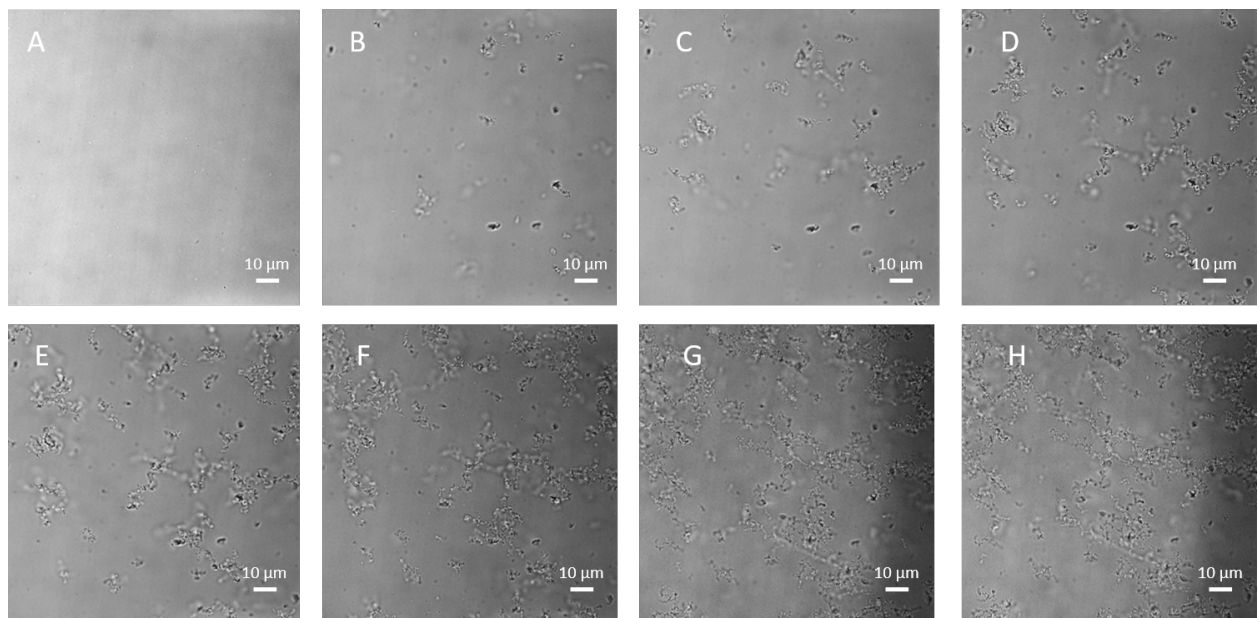

1  
2  
3  
4  
5  
6  
7  
8  
9  
10  
11  
12  
13  
14  
15  
16  
17  
18  
19  
20  
21  
22  
23  
24

**Fig. S14. Bright-field view of the assembly growing after the addition of Src kinase.** (A) 3 minutes after addition of Src kinase, no assemblies shown. (B) 14 minutes after addition of Src kinase, small assemblies shown. (C) 18 minutes after addition of Src kinase, small  $10\ \mu\text{m}$  assemblies start to grow (D) 24 minutes after the addition of Src kinase, growth continues. (E) 30 minutes after addition of Src kinase, over  $50\ \mu\text{m}$  size assemblies form. (F) 35 minutes after addition of Src kinase,  $100\ \mu\text{m}$  size assemblies appear. (G) 40 minutes after addition of Src kinase, assemblies continue to grow. (H) 50 minutes after addition of Src kinase, assemblies have fully matured into fractal-like structures.

1 **Movie S1**

2

3

4

5

6

7

8

9

10

11

12

13

14

15

16

17

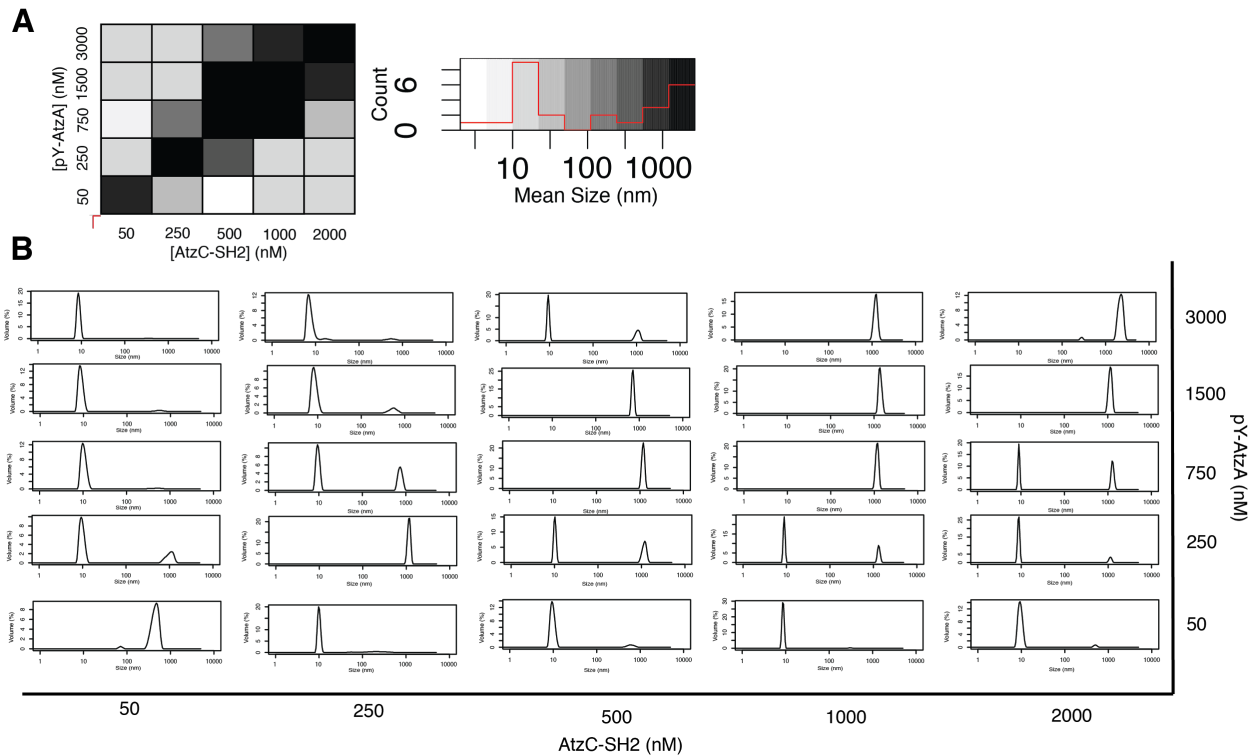

1  
2  
3  
4  
5  
6  
7  
8  
9  
10  
11  
12  
13  
14  
15  
16  
17  
18  
19  
20  
21  
22  
23

**Fig. S15. Average size of particle formed by pY-AtzA and wild type AtzC-SH2.** (A) Heat map showing volume-weighted mean size of particles found from 50-3000 nM pY-AtzA and 50-2000 nM AtzC-SH2. Value shown is average of two physical samples. Histogram illustrates distribution of sizes found on heatmap. (B) Volume distributions of heat map. Distributions shown are representative of other traces in the sample.

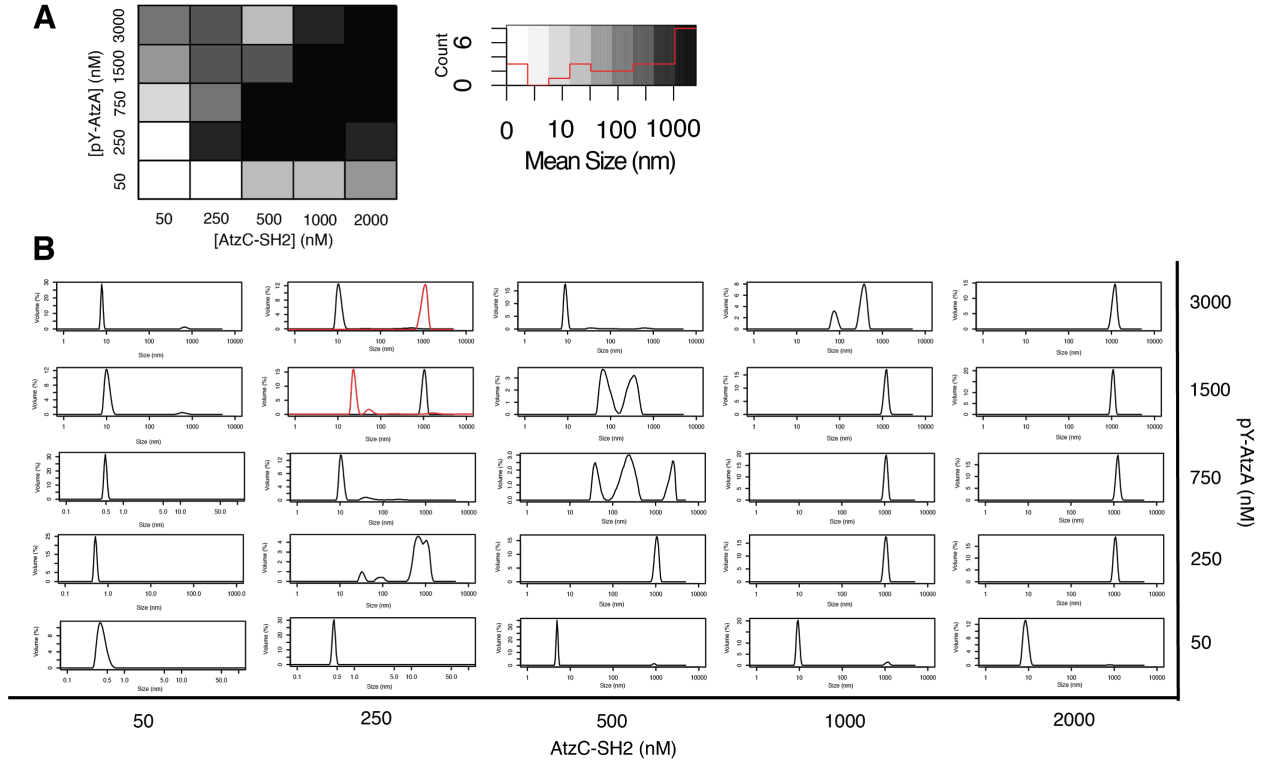

1  
2  
3  
4  
5  
6  
7  
8  
9  
10  
11  
12  
13  
14  
15  
16  
17

**Fig. S16. Average size of particle formed by pY-AtzA and super-binder AtzC-SH2.** (A) Heat map showing volume-weighted mean size of particles found from 50-3000 nM pY-AtzA and 50-2000 nM AtzC-SH2. Value shown is average of two physical samples. Histogram illustrates distribution of sizes found on heatmap. (B) Volume distributions of heat map. Distributions shown are representative of other traces in the sample.

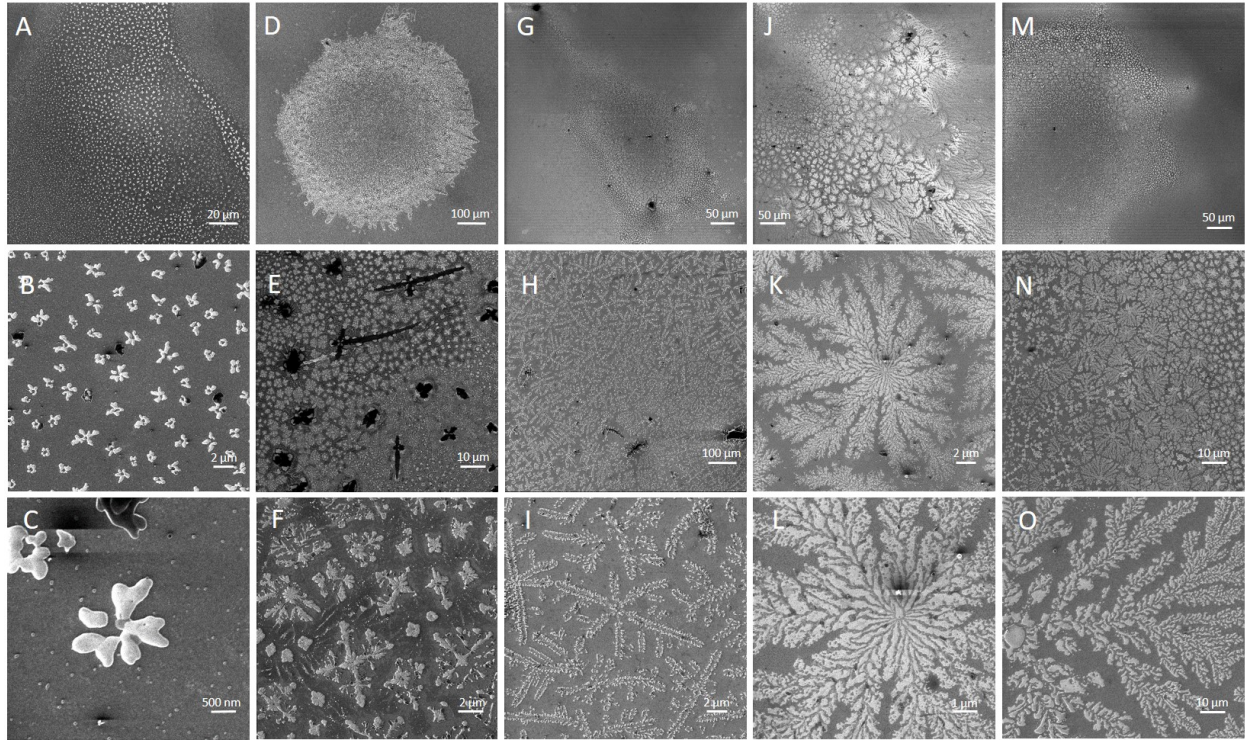

1  
2  
3  
4  
5  
6  
7  
8  
9  
10  
11  
12  
13  
14  
15  
16  
17  
18

**Fig. S17. Helium Ion Microscopy (HIM) depict fractal-like assembly with increasing AtzA concentrations. (A to C) 0.250  $\mu$ M AtzAM1 and 2  $\mu$ M AtzCM1. (D to F) 0.950  $\mu$ M AtzAM1 and 2  $\mu$ M AtzCM1 (G-I) 1.5  $\mu$ M AtzAM1 and 2  $\mu$ M AtzCM1. (J to L) 3  $\mu$ M AtzAM1 and 2  $\mu$ M AtzCM1. (M to O) 3  $\mu$ M AtzAM1 and 1  $\mu$ M AtzCM1.**

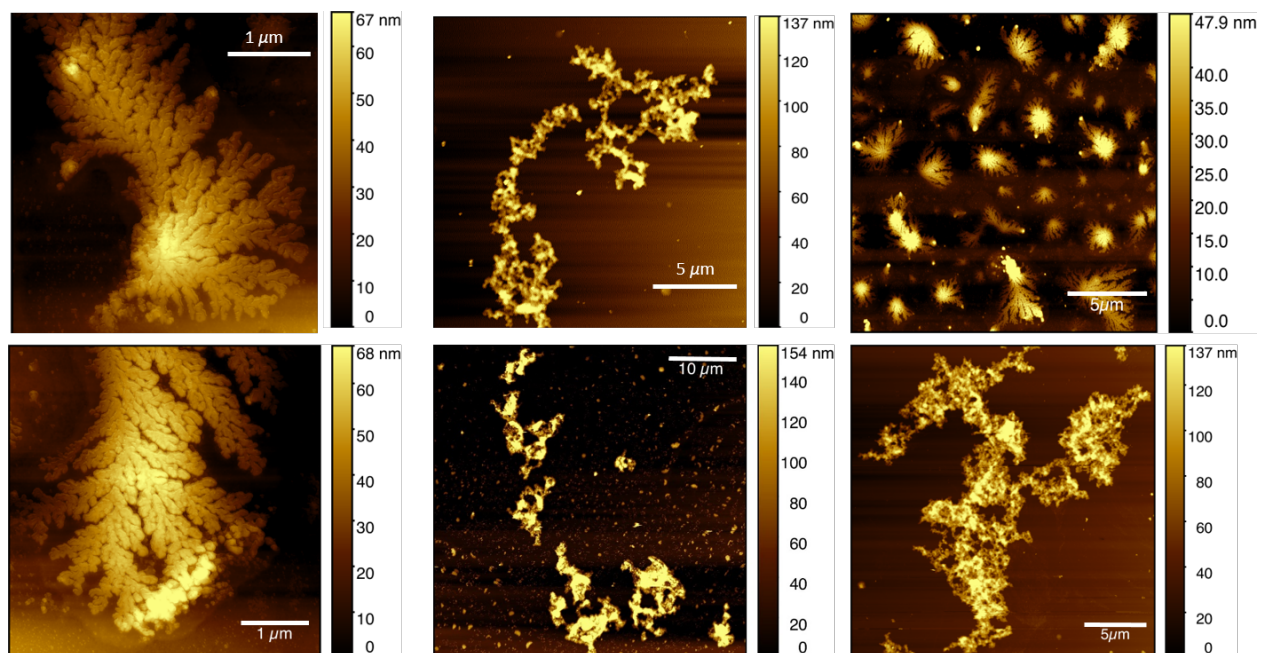

1  
2  
3  
4  
5  
6

**Fig. S18. Atomic Force Microscopy (AFM) images show fractal-like structures, fern-like, and petal-like structures, similar to HIM.**



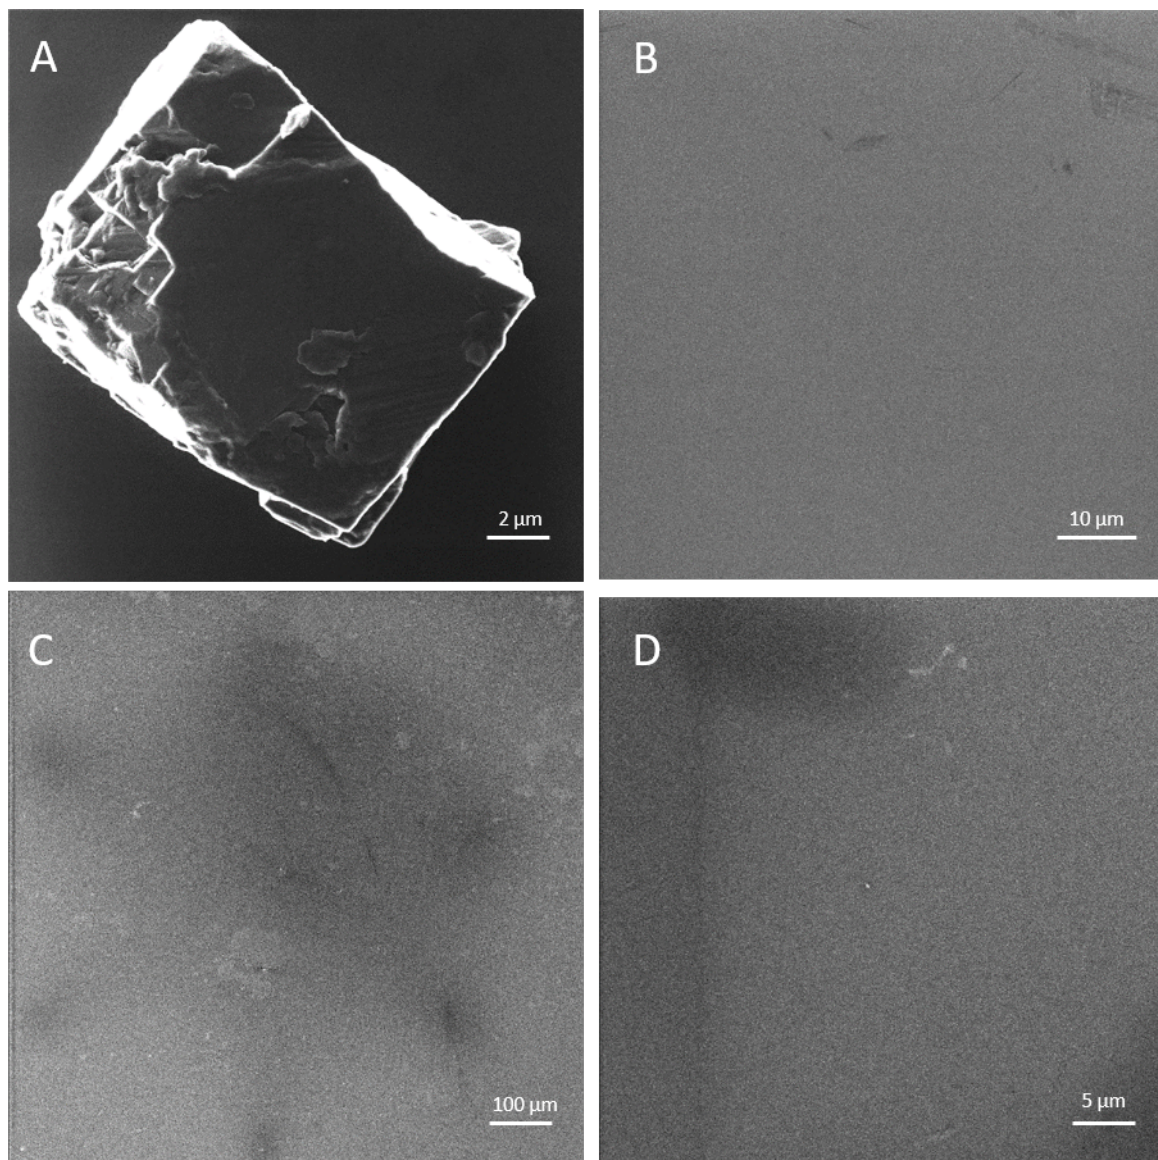

1  
2  
3  
4  
5  
6  
7  
8  
9  
10  
11  
12  
13

**Fig. S19. Helium Ion Microscopy (HIM) buffer and non-phosphorylated controls preclude salt precipitation.** In order to determine that our proteins were forming fractal-like patterns and it was not salt inducing the patterns, a buffer and non-phosphorylated proteins sample controls were used to preclude salt precipitation. (A) Usual HIM square salt crystals on a glass surface. (B) Deposited HNG buffer (50 mM Hepes, 100 mM NaCl, 5% glycerol, pH.7.4, buffer proteins are stored in) on silicon wafer shows no structures on the surface. (C) 3  $\mu$ M non-pY-AtzAM1 and 2  $\mu$ M AtzCM1 control shows no fractal-like structures. (D) 3  $\mu$ M non-pY-AtzAM1 and 1  $\mu$ M AtzCM1 show no fractal-like structures. All controls demonstrate that fractal structures are formed by phosphorylated protein components.

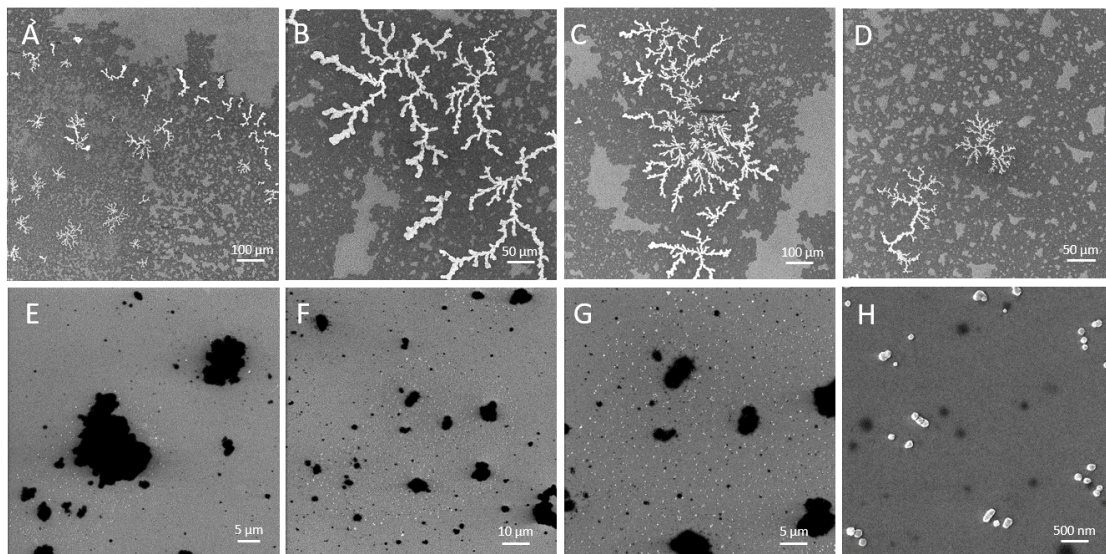

1

2 **Fig S20. Helium Ion Microscopy comparison of fractal assembly and globular assembly.** HIM Images depict fractal-like  
3 assembly with 3 uM AtzAM1 and 2 uM AtzCM1 final concentrations (A to D), while the 3 uM AtzAM1-ExtendedLinker and 2  
4 uM AtzCM1-ExtendedLinker final concentrations show both large and small globular shape proteins on the silicon surface (E to  
5 H).

6

7

8

9

10

11

12

13

14

15

16

17

18

19

20

21

1

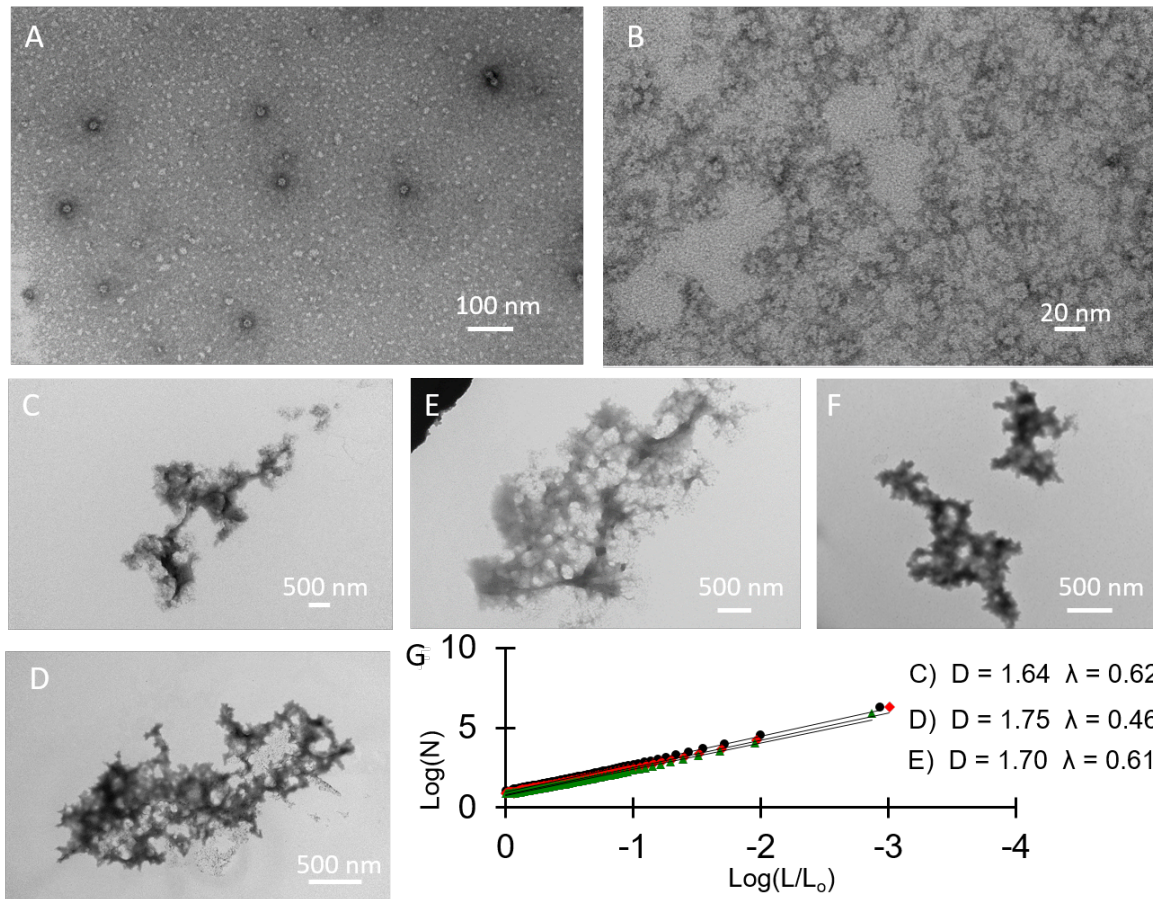

2

3 **Fig. S21. Transmission Electron Microscopy (TEM) depicts fractal-like assemblies in the phosphorylated samples while**  
 4 **the non-phosphorylated samples depict individual proteins. (A and B) ten-fold dilution of 3  $\mu$ M non-pY-AtzAM1 and 2  $\mu$ M**  
 5 **AtzCM1, which shows the individual proteins. (C to F) Various assembly images of the ten-fold dilution of 3  $\mu$ M pY-AtzAM1**  
 6 **and 2  $\mu$ M AtzCM1 sample which form the fractal-like assembly consistently. (G) Image analysis (2D) using box counting yields**  
 7 **the expected fractal dimension of  $\sim$ 1.7 for the C, D, and E, TEM images.**

8

9

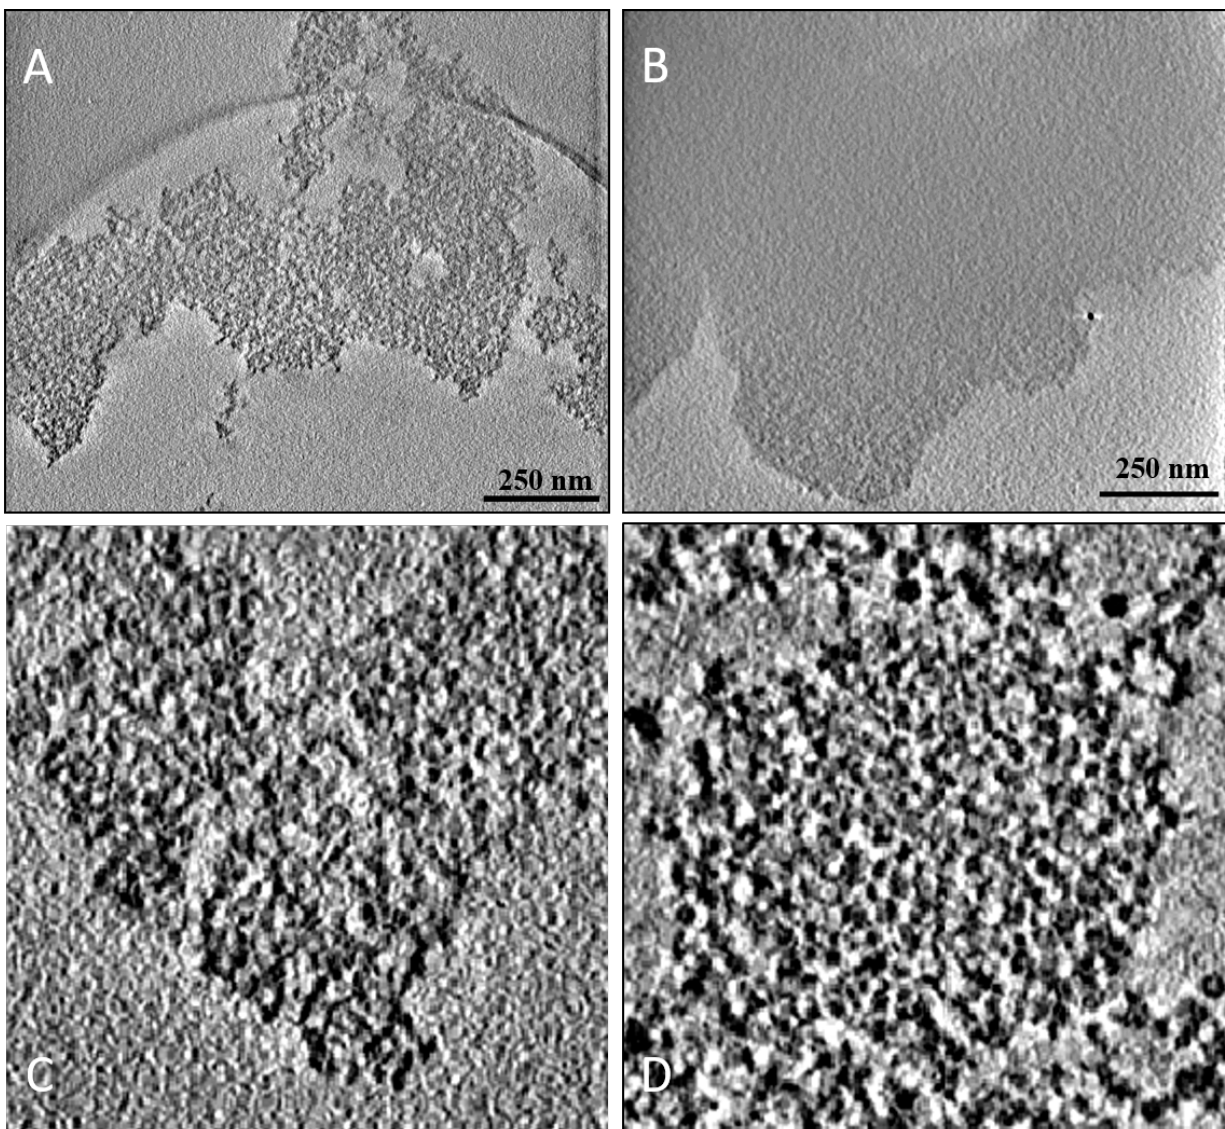

1  
2  
3  
4  
5  
6  
7  
8  
9  
10  
11  
12

**Fig S22. Comparison of the fractal assembly CryoEM tomograms and the extended linker globular assemblies.** CryoEM tomograms of the fractal-like assemblies (A) and the extended linker assemblies (B) show a difference in the overall topology of the two different assemblies. Zoomed in versions of the images show representatives of a fractal assembly (C) and of a very dense and globular structure (D).

- 1
- 2
- 3
- 4
- 5
- 6
- 7
- 8
- 9
- 10
- 11
- 12
- 13
- 14
- 15
- 16
- 17
- 18
- 19
- 20
- 21
- 22
- 23
- 24
- 25
- 26
- 27
- 28
- 29

**Movies S2,S3.** CryoET-derived structure videos.

1  
2  
3

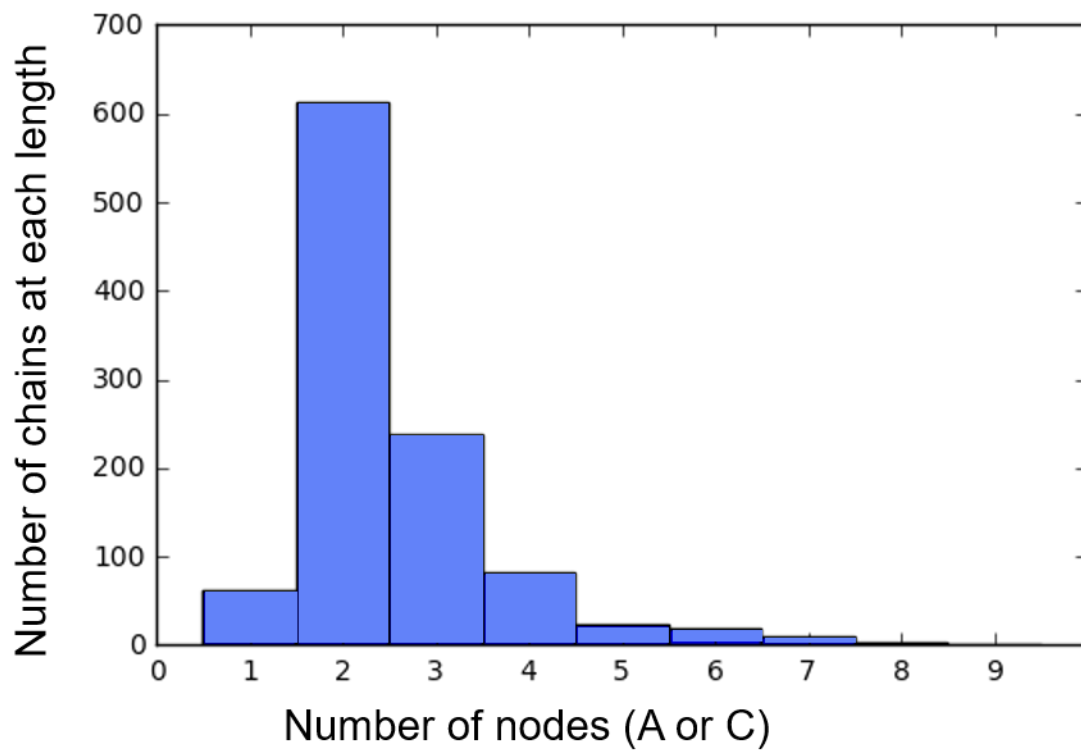

4  
5  
6  
7  
8  
9

**Fig S23.** Length distribution of short chains that are not included in the large assembly.

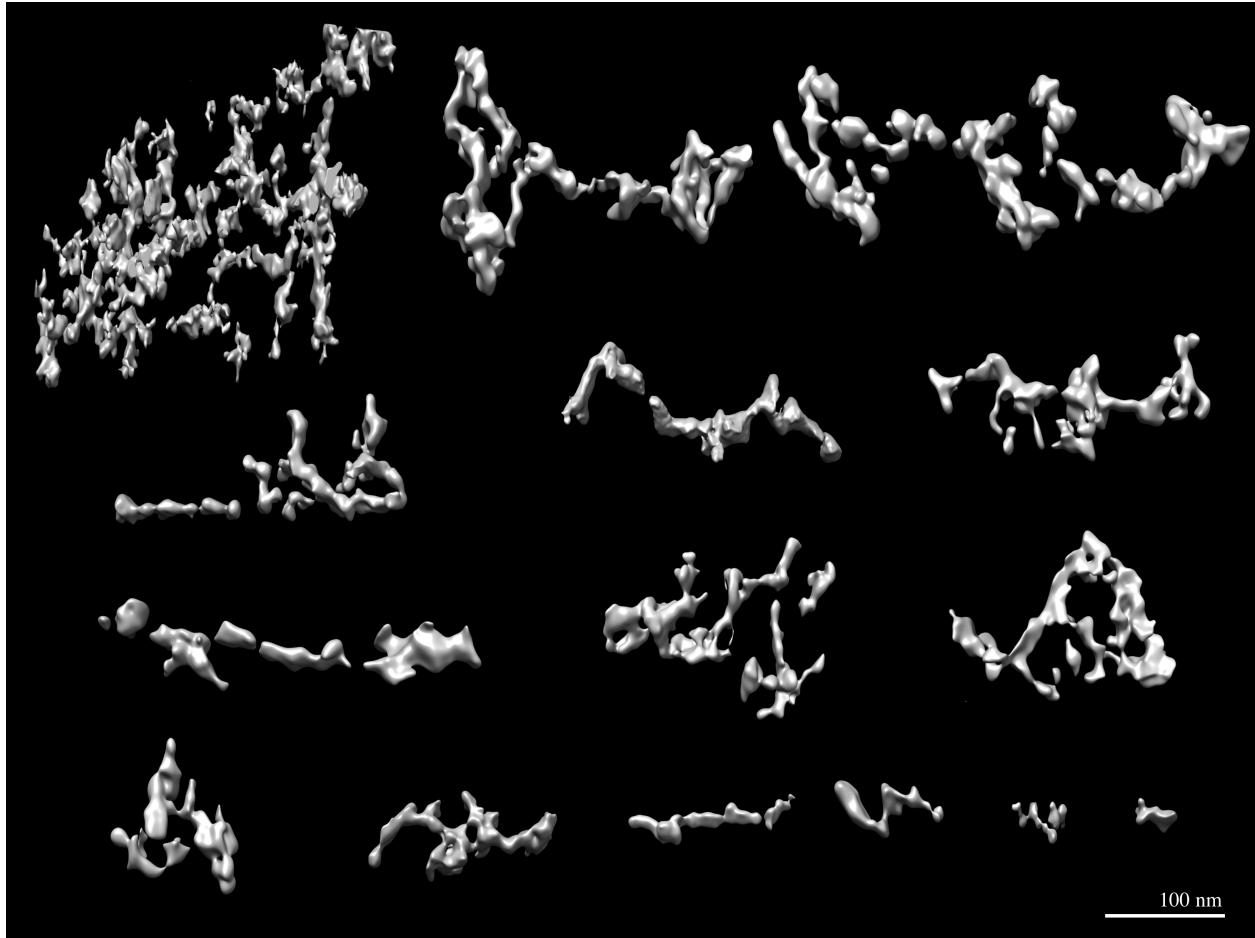

1

2 **Fig S24.** Isosurface views of the assembly tomograms, from large to small.

3

4

5

6

7

8

9

10

11

12

13

14

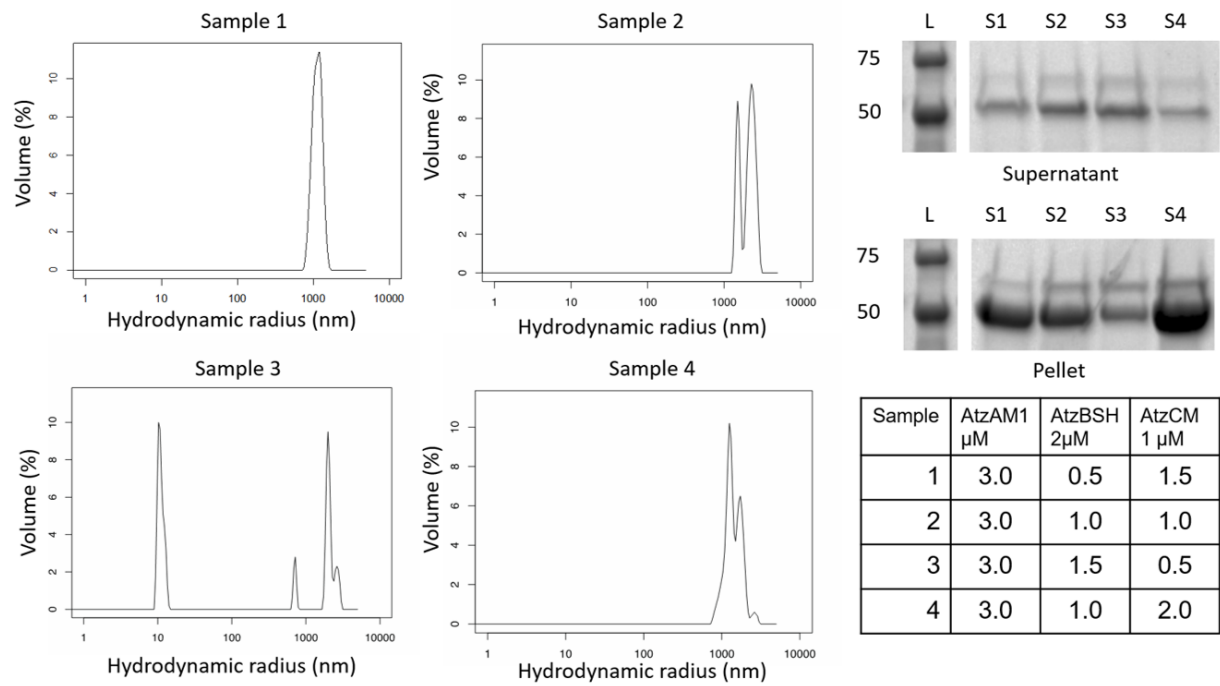

1

2

3 **Fig. S25. DLS and SDS PAGE confirm AtzBSH2 incorporation into the 3-component assembly.** AtzAM1, AtzBSH2, and  
 4 AtzCM1 were added and allowed to incubate at various concentrations, then analyzed with DLS which showed that the addition  
 5 of AtzBSH2 continues to have an assembly at  $\sim 1\mu\text{m}$ . The SDS Page gel samples were a pelleted sample of the three components  
 6 assembly and supernatant. If AtzBSH2 is incorporated into the assembly, there should not be any left in the supernatant. The  
 7 pellet shows that the expected MW weight of AtzBSH2  $\sim 69\text{kda}$  is seen in the pellet with increasing AtzBSH2 concentrations, this  
 indicates that the AtzBSH2 was incorporated into the assembly since it became insoluble and does not appear in the supernatant.

8

9

10



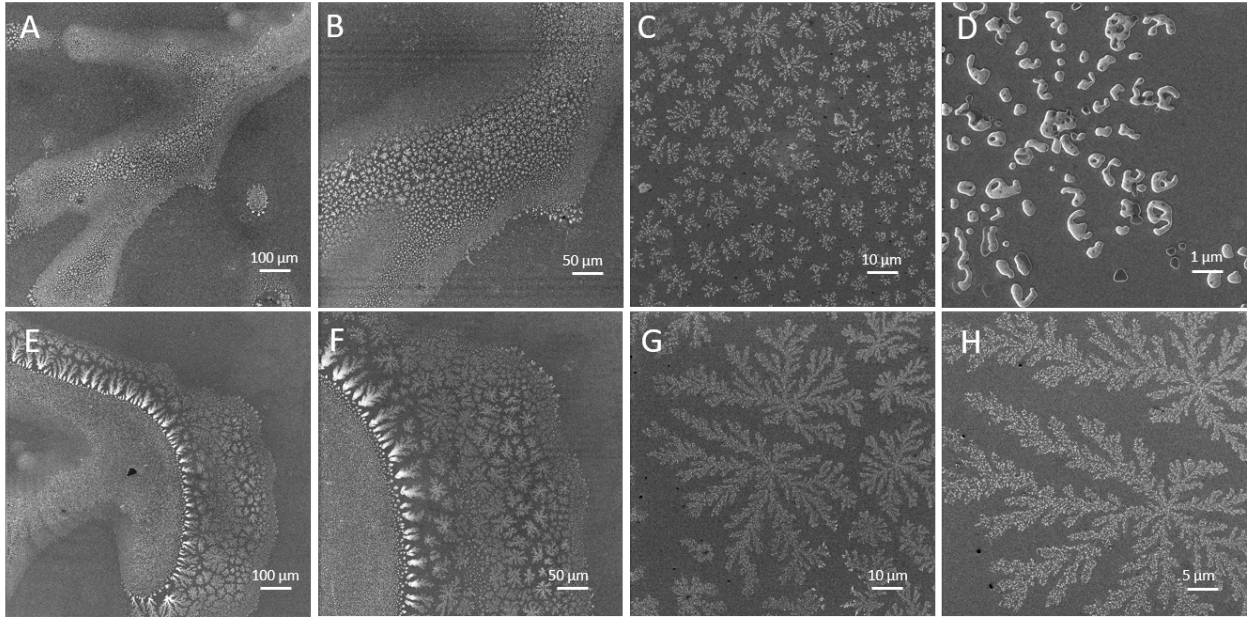

1  
2  
3  
4  
5  
6  
7  
8  
9  
10  
11  
12  
13  
14  
15  
16  
17  
18  
19

**Fig. S26. Helium Ion Microscopy (HIM) images depict fractal-like assembly with 3  $\mu$ M AtzAM1, 1  $\mu$ M AtzBSH2, 1  $\mu$ M AtzCM1 final protein concentrations. (A to D) Various views of the fractal-like 3-component assembly are shown.**

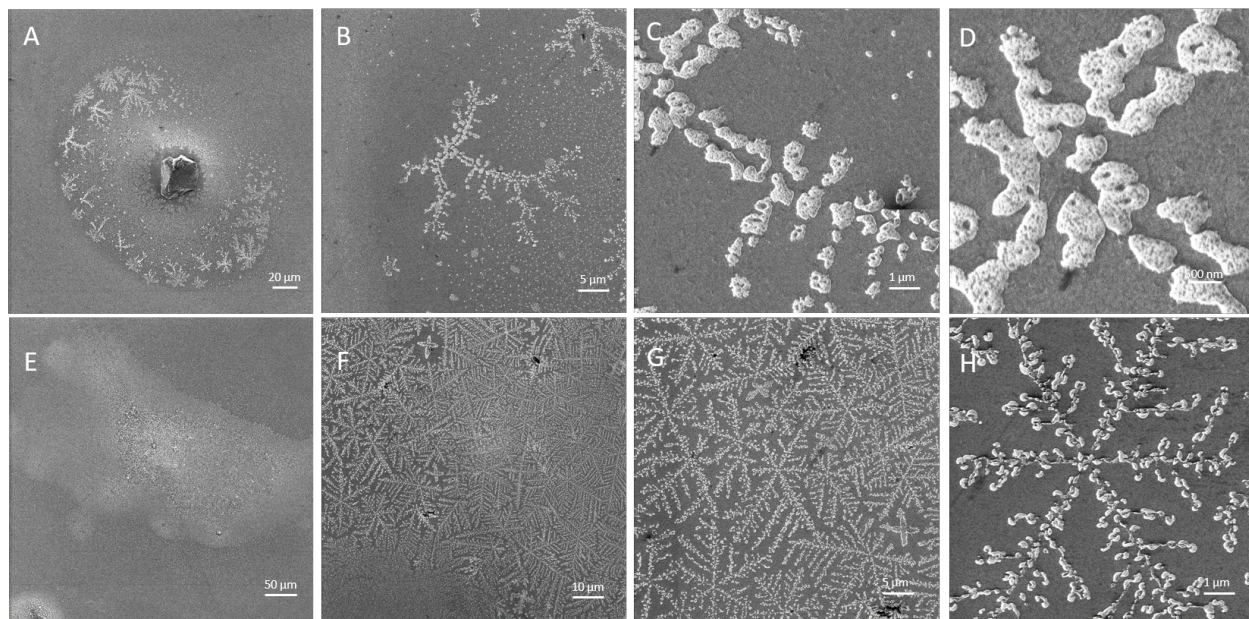

1  
2  
3  
4  
5  
6  
7  
8  
9  
10  
11  
12  
13  
14  
15  
16  
17  
18  
19

**Fig. S27. Helium Ion Microscopy (HIM) images depict fractal-like assembly with 3  $\mu\text{M}$  AtzAM1, 1  $\mu\text{M}$  AtzBSH2, 2  $\mu\text{M}$  AtzCM1 final concentrations. (A to H) Various views of the 3-component assembly with fractal-like structures are shown.**

1

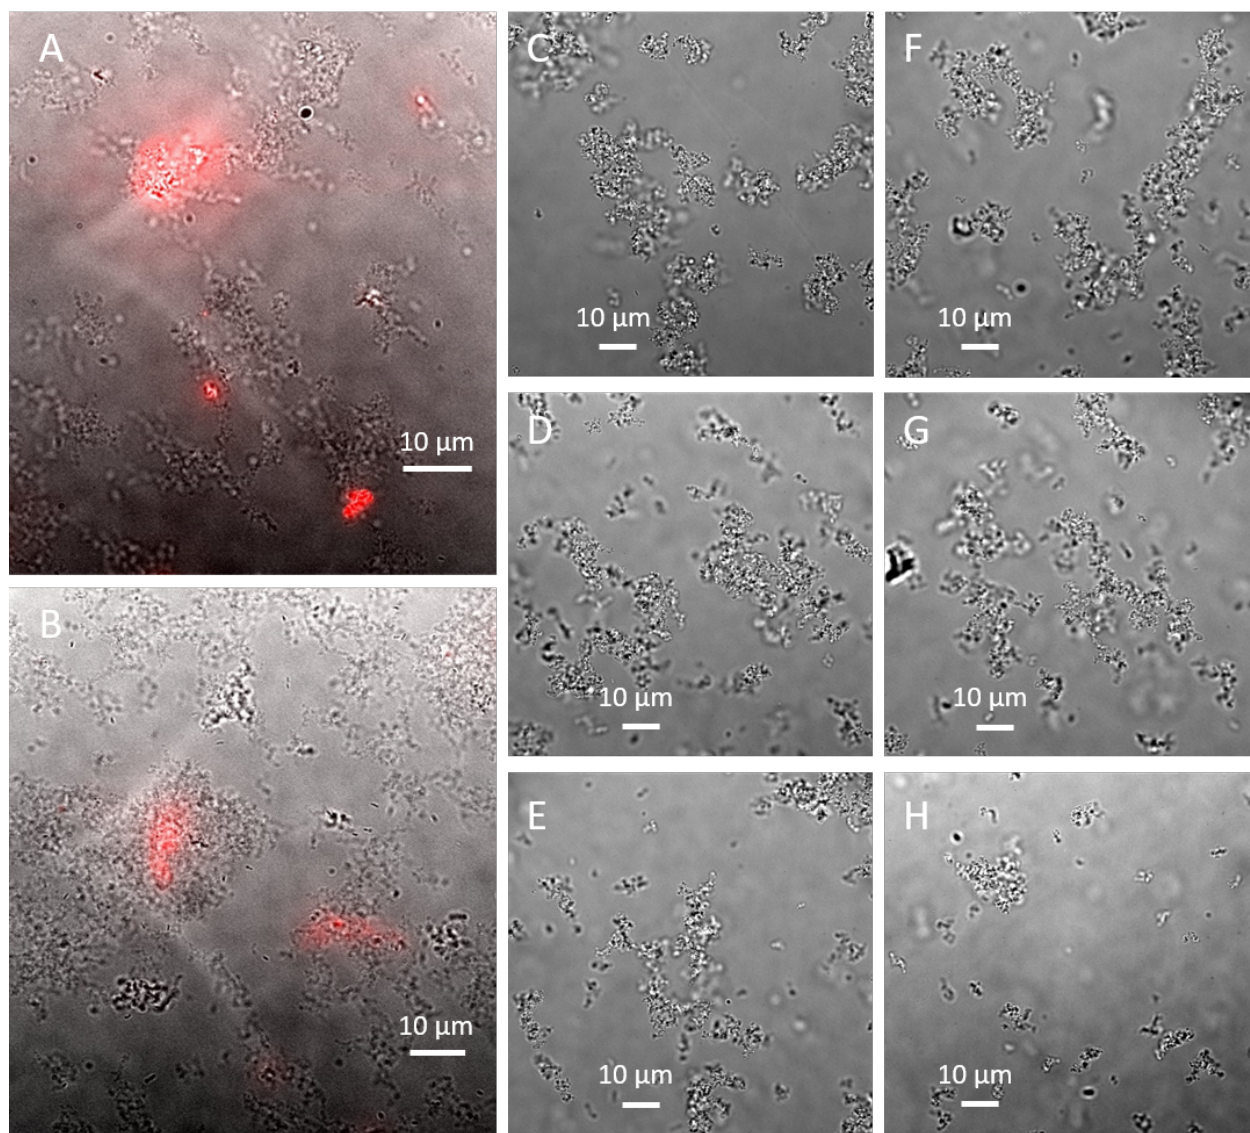

2

3

4

5

6

7

8

9

10

11

12

13

**Fig. S28. Fluorescence microscopy and bright-field images of the 3-component assembly confirm incorporation of AtzBSH2 into assembly while bright-field images confirm the fractal-like nature of the 2-component assembly. (A and B) 3 μM AtzAM1, 1 μM AtzBSH2 dye labeled with Alexa Fluor™ 647, 2 μM AtzCM1 image shows AtzBSH2 incorporation into 3-component assembly at various locations (C to H) 3 μM AtzAM1 and 2 μM AtzCM1 assembly images depict fractal-like assembly structure.**

1  
2  
3  
4

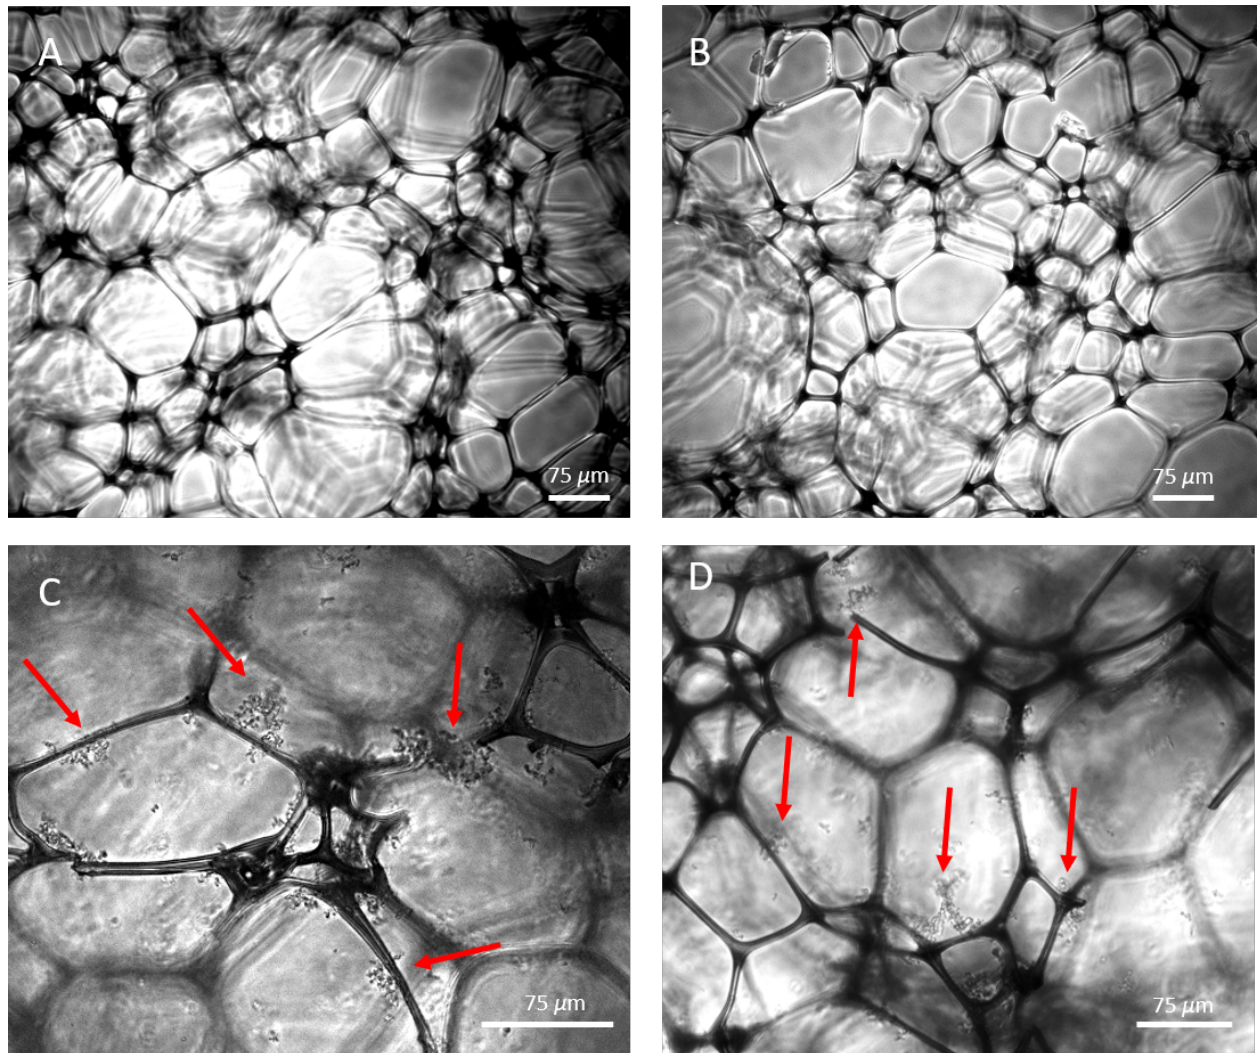

5  
6  
7  
8  
9  
10  
11  
12  
13  
14

**Fig. S29. Phase contrast micrographs of the Basotect® polymer foam with and without assemblies.** (A and B) The microporous polymer foam with no assemblies. (C and D) The assemblies have been immobilized into the polymer foam, red arrows depict locations with assemblies. Images were taken with a Leica DM4000 B LED microscope, 10X objective (100X total magnification).

1  
2

Reg-Assembly      ExtLinker-Assembly  
Reg-Unassembled      ExtLinker-Unassembled

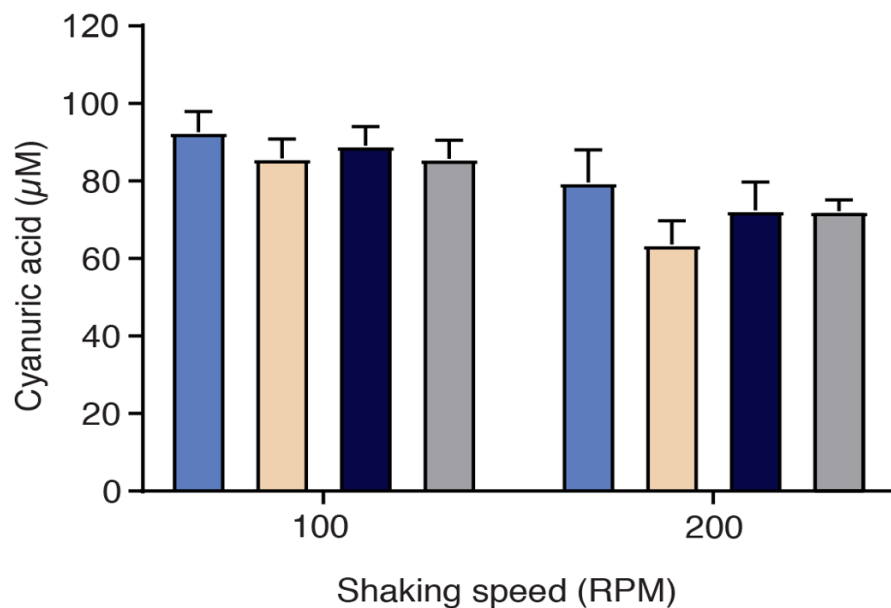

3  
4  
5  
6  
7  
8  
9  
10  
11  
12  
13  
14  
15  
16  
17  
18  
19  
20

**Fig. S30. The fractal-like assemblies (Reg-Assembly) and the extended linker globular assemblies (ExtLinker-Assembly) enzymatic conversion of atrazine to cyanuric acid demonstrates no enzymatic benefit of a globular assembly.** AtzB was incorporated into the two-component assembly as an SH2-domain fusion as previously described to create the three-component assembly for both the fractal and globular assemblies. The activity of the fractal-like assembly was higher than the extended linker assemblies under high shaking speeds of 200 rpm.

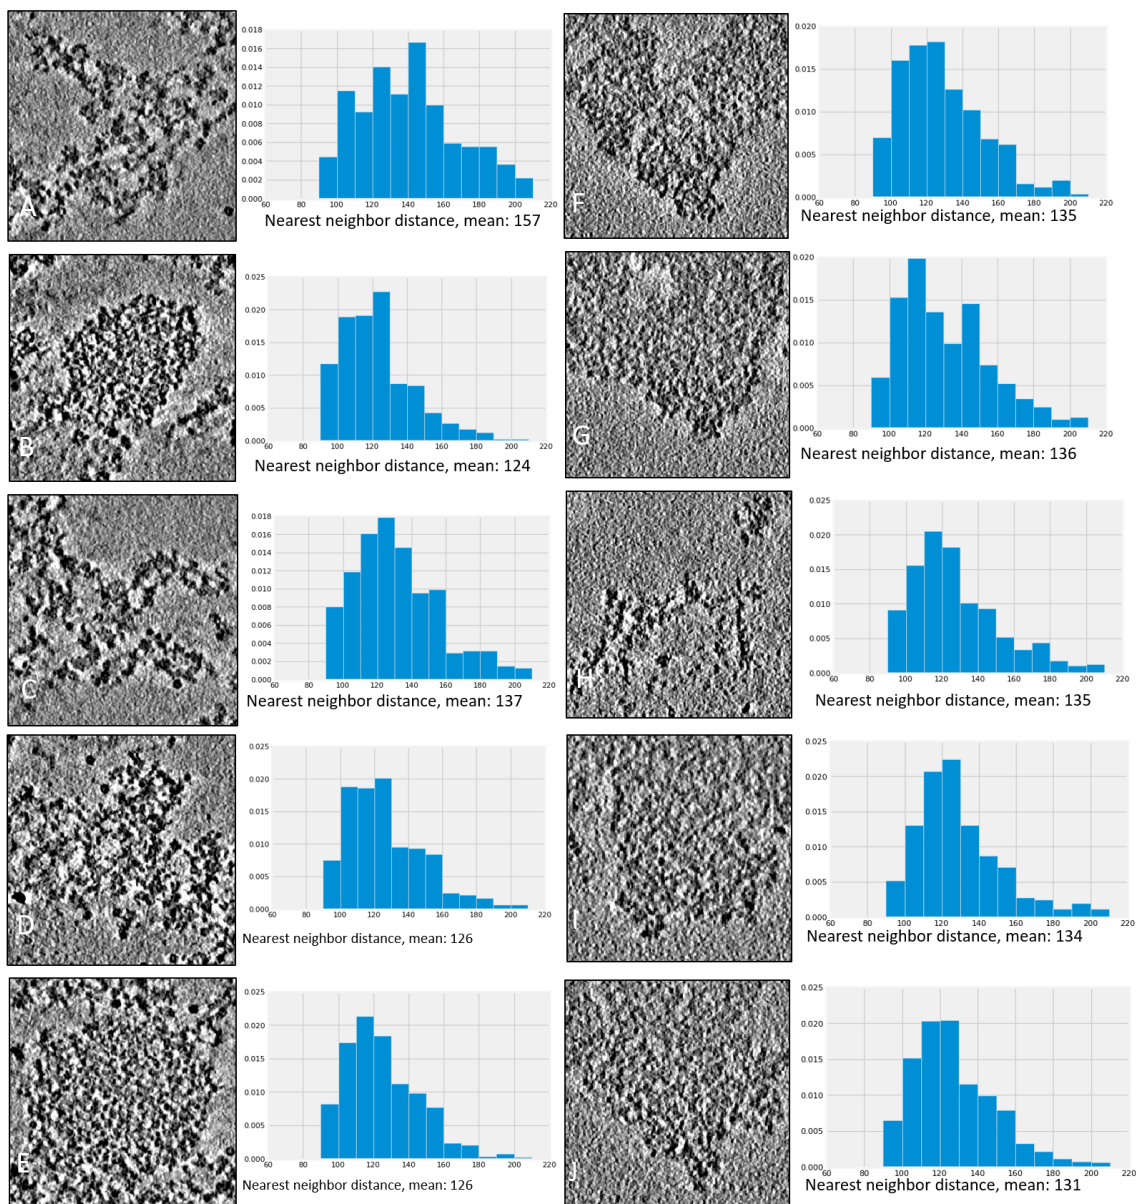

1

2 **Fig S31. Analysis of the fractal assembly CryoEM tomograms and the extended linker globular assemblies.** CryoEM  
 3 tomograms of the fractal-like assemblies (A-E) and the extended linker assemblies (F-J) next to the calculated nearest neighbor  
 4 distance and mean average distance are shown.

5

6
